# Supplementary material
Source: PubMed Central journal article supplement (PMC3157552)
Supplement: NIHMS306923-supplement-1.pdf [file NIHMS306923-supplement-1.pdf]

## SUPPLEMENTAL MATERIAL

### A genome-wide association study identifies *LIPA* as a susceptibility gene for coronary artery disease

Philipp S Wild\*<sup>1</sup>, Tanja Zeller\*<sup>1</sup>, Arne Schillert\*<sup>2</sup>, Silke Szymczak<sup>2</sup>, Christoph R Sinning<sup>1</sup>, Arne Deiseroth<sup>1</sup>, Renate B Schnabel<sup>1</sup>, Edith Lubos<sup>1</sup>, Till Keller<sup>1</sup>, Medea S Eleftheriadis<sup>1</sup>, Christoph Bickel<sup>3</sup>, Hans J Rupprecht<sup>1</sup>, Sandra Wilde<sup>1</sup>, Heidi Rossmann<sup>4</sup>, Patrick Diemert<sup>5</sup>, L Adrienne Cupples<sup>6</sup>, Claire Perret<sup>7</sup>, Jeanette Erdmann<sup>5</sup>, Klaus Stark<sup>8</sup>, Marcus E Kleber<sup>9</sup>, Stephen E Epstein<sup>10</sup>, Benjamin F Voight<sup>11</sup>, Kari Kuulasmaa<sup>12</sup>, Mingyao Li<sup>13</sup>, Arne S Schäfer<sup>14</sup>, Norman Klopp<sup>15</sup>, Peter S Braund<sup>16</sup>, Hendrik Sager<sup>5</sup>, Serkalem Demissie<sup>6</sup>, Carole Proust<sup>7</sup>, Inke R König<sup>2</sup>, Heinz-Erich Wichmann<sup>15</sup>, Wibke Reinhard<sup>8</sup>, Michael M Hoffmann<sup>17</sup>, Jarmo Virtamo<sup>12</sup>, Mary Susan Burnett<sup>10</sup>, David Siscovick<sup>18</sup>, Per Gunnar Wiklund<sup>19</sup>, Liming Qu<sup>13</sup>, Nour Eddine El Mokthari<sup>20</sup>, John R Thompson<sup>21</sup>, Annette Peters<sup>15</sup>, Albert V Smith<sup>22,23</sup>, Emmanuelle Yon<sup>7</sup>, Jens Baumert<sup>15</sup>, Christian Hengstenberg<sup>8</sup>, Winfried März<sup>24</sup>, Philippe Amouyel<sup>25</sup>, Joseph Devaney<sup>10</sup>, Stephen Schwartz<sup>18</sup>, Olli Saarela<sup>12</sup>, Nehal N Mehta<sup>26</sup>, Diana Rubin<sup>27</sup>, Kaisa Silander<sup>12</sup>, Alistair S Hall<sup>28</sup>, Jean Ferriers<sup>36</sup>, Tamara B Harris<sup>29</sup>, Olle Melander<sup>30</sup>, Frank Kee<sup>31</sup>, Hakon Hakonarson<sup>32</sup>, Jürgen Schrezenmeir<sup>33</sup>, Vilmondur Gudnason<sup>22,23</sup>, Roberto Elosua<sup>34</sup>, Dominique Arveiler<sup>35</sup>, Alun Evans<sup>31</sup>, Daniel J Rader<sup>37</sup>, Thomas Illig<sup>15</sup>, Stefan Schreiber<sup>14</sup>, Joshua C Bis<sup>38</sup>, David Altshuler<sup>39</sup>, Maryam Kavousi<sup>40,42</sup>, Jaqueline CM Witteman<sup>40,42</sup>, Andre G Uitterlinden<sup>40,41,42</sup>, Albert Hofman<sup>40,42</sup>, Aaron R Folsom<sup>43</sup>, Maja Barbalic<sup>44</sup>, Eric Boerwinkle<sup>44</sup>, Sekar Kathiresan<sup>45</sup>, Muredach P Reilly<sup>26</sup>, Christopher J O'Donnell<sup>6</sup>, Nilesh J Samani<sup>16</sup>, Heribert Schunkert<sup>5</sup>, Francois Cambien<sup>7</sup>, Karl J Lackner<sup>4</sup>, Laurence Tiret<sup>7</sup>, Veikko Salomaa<sup>12</sup>, Thomas Munzel\*<sup>1</sup>, Andreas Ziegler\*<sup>2</sup>, Stefan Blankenberg\*<sup>1</sup>

- 1: Department of Medicine II, University Medical Center Mainz, Langenbeckstraße 1, 55131 Mainz, Germany
- 2: Institute of Medical Biometry and Statistics, University Hospital Schleswig-Holstein, Campus Lübeck, Maria-Goeppert-Str. 1, 23562 Lübeck, Germany
- 3: Department of Internal Medicine, Federal Armed Hospital Koblenz, 56072 Koblenz, Germany
- 4: Institute for Clinical Chemistry and Laboratory Medicine, University Medical Center Mainz, Langenbeckstraße 1, 55131 Mainz, Germany
- 5: Medizinische Klinik II, Universität zu Lübeck, Ratzeburger Allee 160, 23538 Lübeck, Germany
- 6: National Heart, Lung and Blood Institute's Framingham Heart Study, Framingham, MA, USA
- 7: INSERM UMRS937, Pierre and Marie Curie University and Medical School, Paris, France
- 8: Klinik und Poliklinik für Innere Medizin II, University Hospital Regensburg, Franz-Josef-Strauss-Allee 11, 93053 Regensburg, Germany
- 9: LURIC Study nonprofit LLC, Platz der Alten Synagoge 1, 79098 Freiburg, Germany
- 10: Cardiovascular Research Institute, MedStar Health Research Institute, Washington D.C. 20010, USA
- 11: Broad Institute, 5 Cambridge Center, Cambridge 02142, USA
- 12: National Institute for Health and Welfare, P.O. Box 30, FI-00271 Helsinki, Finland
- 13: Department of Biostatistics, University of Pennsylvania, 2 Blockley, Philadelphia 19104, USA
- 14: Institute of Clinical Molecular Biology, Christian-Albrechts-University Kiel, Arnold-Heller Straße 3, 24105 Kiel, Germany
- 15: Institut für Epidemiologie, Helmholtz Zentrum München, Ingolstädter Landstraße 1, 85764 Neuherberg, Germany
- 16: Department of Cardiovascular Sciences, University of Leicester and Leicester NIHR Biomedical Research Unit in Cardiovascular Disease, Glenfield Hospital, Groby Road Leicester, LE3 9QP, UK

- 17: Division of Clinical Chemistry, Department of Medicine, University Medical Center, Hugstetter Strasse 49, 79075 Freiburg;, Germany
- 18: Cardiovascular Health Research Unit, Departments of Medicine and Epidemiology University of Washington, 1730 Minor Ave., Mail Room 9, Seattle 98101, USA
- 19: Department of Public Health and Clinical Medicine, Umeå University, SE-901 85 Umeå,
- 20: Clinic of Cardiology, University Medical Center Schleswig-Holstein, Arnold-Heller Straße 3, 24105 Kiel, Germany
- 21: Department of Health Sciences, University of Leicester, University Road, Leicester LE1 7RH, UK
- 22: Icelandic Heart Association, Kopavogur, Iceland
- 23: University of Iceland, Reykjavik, Iceland
- 24: Synlab Center of Laboratory Diagnostics, Heidelberg, PO Box 10 47 80, 69037 Heidelberg, Germany
- 25: INSERM U508, Dept. Epidemiology and Public Health, Pasteur Institute of Lille, 1 rue Albert Calmette, B.P.245, 59019 Lille Cedex, France
- 26: Cardiovascular Institute, University of Pennsylvania, Philadelphia 19104, USA
- 27: Internal Medicine, University Medical Center Schleswig-Holstein, Arnold-Heller Straße 3, 24105 Kiel, Germany
- 28: Leeds Institute of Genetics, Health and Therapeutics University of Leeds, Great George Street, Leeds LS1 3EX, UK
- 29: Laboratory of Epidemiology, Demography, and Biometry, Intramural Research Program, National Institute on Aging, National Institutes of Health, Bethesda MD, USA
- 30: Department of Clinical Sciences, Lund University, Lund SE 205 02, Sweden
- 31: UK Clinical Research Collaboration Center of Excellence for Public Health, Queens University of Belfast, BT12 6BJ Belfast, Northern Ireland
- 32: Center for Applied Genomics, Children's Hospital of Philadelphia / University of Pennsylvania, 14 Abrahamson Research Building, Philadelphia19104, USA
- 33: Institute of Physiology and Biochemistry of Nutrition, Max Rubner-Institute, Hermann-Weigmann-Str 1, 24103 Kiel, Germany
- 34: Grup d'Epidemiologia i Genètica Cardiovascular, IMIM Doctor Aiguader, 88 Barcelona 08003, Spain
- 35: Laboratoire d'épidémiologie et de santé publique, Université de Strasbourg, 4 rue Kirschleger, 67085 Strasbourg Cedex, France
- 36: Faculté de Médecine Toulouse Purpan, Département d'Epidémiologie - Bât G, 37 Allées Jules Guesde 31073 Toulouse Cedex France
- 37: Institute of Translational Medicine and Therapeutics, University of Pennsylvania 650 BRB, 421 Curie Blvd, Philadelphia 19104, USA
- 38: Department of Medicine, University of Washington, Seattle, Washington, USA
- 39: Center for Human Genetic Research and Department of Molecular Biology, Massachusetts General Hospital, 185 Cambridge Street, Boston 02114, USA
- 40: Department of Epidemiology, Erasmus Medical Center, Rotterdam, The Netherlands
- 41: Department of Internal Medicine, Erasmus Medical Center, Rotterdam, The Netherlands
- 42: Netherlands Genomics Initiative (NGI)-Sponsored Netherlands Consortium for Healthy Aging (NCHA)
- 43: University of Minnesota, School of Public Health, Division of Epidemiology and Community Health, School of Public Health, Minneapolis, Minn, USA
- 44: University of Texas, Health Science Center, Human Genetics Center, Houston, TX, USA
- 45: Center for Human Genetic Research and Cardiovascular Research Center, Massachusetts General Hospital, 185 Cambridge Street, Boston, 02114, USA

## **Contents**

### **Part A. Supplementary Methods**

- a. Description of the CADomics and the GHSExpress study samples
- b. Description of in-silico replication cohorts
- c. Description of wet-lab replication cohorts
- d. Informed Consent
- e. Definition of cardiovascular risk factors and assessment of phenotypes of subclinical atherosclerosis
- f. Genotyping Methods
- g. Gene Expression Methods

### **Part B. Supplementary Tables**

### **Part C. Supplementary Figures**

### **Part D. Supplementary References**

### **Part E. Affiliation of Authors to Cohorts**

### **Part F. Source of Funding and Acknowledgment for replication studies**

## **Part A. Supplementary Methods**

### *a. Description of the CADomics and the GHSExpress study samples*

CADomics (Coronary Artery Disease and Genomics) is a German case-control study for CAD. It is a pooled study from the hospital (catheter-lab)-based AtheroGene Registry and the population-based Gutenberg-Heart Study (GHS).

**Atherogene Registry.** Between June 1999 and February 2004, patients with documented CAD referred to the Department of Medicine II of the Johannes Gutenberg-University in Mainz, Germany and the Department of Medicine of the German Federal Armed Forces Central Hospital, Koblenz, were enrolled in the *AtheroGene registry*. Coronary angiography was performed in all patients. The study design has been described elsewhere.<sup>1</sup>

**The Gutenberg Heart Study (GHS)** is designed as a population-based, prospective, observational single-center cohort study in the Rhein-Main-Region in western Mid-Germany to evaluate and improve cardiovascular risk stratification. The sample was drawn randomly from the governmental local registry offices in the city of Mainz and the district of Mainz-Bingen. The sample was stratified 1:1 for gender and for urban and rural residence with equal strata for decades of age. Individuals between 35 and 74 years of age were enrolled, and written informed consent was obtained from all participants. Exclusion criteria were insufficient knowledge of the German language, and physical or psychological inability to participate in the examinations at the study center. The study protocol and the sampling design were approved by the local ethics committee, and by the local and federal data safety commissioners.

**Gutenberg Heart Express Study (GHSExpress).** The GHSExpress study is a cohort study of a subsample of the Gutenberg Heart Study. The first 9 participants on each examination day of the baseline examination were included in the GHSExpress study. Monocytes were isolated from fresh blood samples and RNA was extracted within the same day. Data sets used in the present studies were from unrelated adults of European descent only.

*b. Description of in-silico replication cohorts*

*In silico* replication cohorts consisted of cases with CAD/MI and matched controls from 7 studies. All participants were European ancestry. The 7 cohorts were: Cohorts for Heart and Aging Research in Genomic Epidemiology Consortium (CHARGE), German MI Family Study (GerMIFS) I and II, MedStar, PennCATH, Myocardial Infarction and Genetics Consortium (MIGen) and the Wellcome Trust Case Control Consortium CAD Study (WTCCC-CAD).

**CHARGE.** The Cohorts for Heart and Aging Research in Genomic Epidemiology (CHARGE) Consortium was formed to facilitate genome-wide association studies meta-analyses and replication opportunities among multiple large population-based cohorts studies. It consists of the following five population-based cohorts: Age, Gene/Environment susceptibility (AGES)-Reykjavik Study, Atherosclerosis Risk in Communities (ARIC) Study, Cardiovascular Health Study (CHS), Framingham Heart Study (FHS) and Rotterdam study (RS). In short, the AGES – Reykjavik Study represents a sample from a population-based Reykjavik Study, originally comprising 31,795 individuals. Between 2002 and 2006, 5,764 survivors of the original cohorts were re-examined. The ARIC study is a population-based prospective cohort study including 15,792 individuals aged 45-64 years at baseline from 4 US communities. CHS is a population-based cohort study in adults over 65 years of age conducted at 4 field centers. The FHS started in 1948 with the recruitment of an original cohort of 5,209 men and women aged 28-62 years of age. In 1971, children and spouses of children of the original cohort were enrolled. The third generation cohort enrollment started in 2002 and comprises 4,095 children of offspring cohort participants. The RS is a prospective population-based cohort study comprising 7,983 subjects aged 55 years or older (RS-I). In 2000-2001, an additional 3,011 individuals aged 55 years or older were recruited (RS-II). Further details of the CHARGE consortium can be found elsewhere.<sup>2</sup>

**GerMIFS I.** The German MI Family Study I (GerMIFS I) comprises unrelated German MI patients (age of onset < 65 years) having at least one first-degree relative with premature CAD. The subjects used in this analysis are distinct from those used in the initial genome-wide association study. Patients were recruited between 1997 and 2002 from hospital clinics and were studied by physical examination, blood testing, echocardiography, as well as a standardized interview. All events were validated through inspection of hospital charts. Healthy German married-in spouses from the same recruitment centre served as controls. Further details of the GerMIFS I study can be found elsewhere <sup>3</sup>.

**GerMIFS II.** The recruitment for German MI Family Study II (GerMIFS II) was similar to that for GMIFS I. All 1,222 patients had a validated MI with a strong genetic component as documented by an early age of onset (prior to the age of 60 years). Moreover, a positive family history for CAD was documented in 726 (59.4 %) of patients. Patients were identified following their admission for acute treatment of MI or in cardiac rehabilitation clinics. Population-based controls were derived from the MONICA/KORA Augsburg survey S4 1 (n=820). Further details of the GerMIFS II study can be found elsewhere <sup>4</sup>.

**MedStar.** The MedStar study, conducted by the Cardiovascular Research Institute of the MedStar Health Research Institute, is a Washington Hospital Center based angiographic study of 1,500 subjects specifically designed for biomarker and genetic association studies of acute and chronic coronary atherosclerosis. Briefly, the MedStar study is a cross sectional study of coronary atherosclerosis in a consecutive cohort of selected patients undergoing cardiac catheterization at Washington Hospital Center between August 2004 and March 2007. All subjects were enrolled in a MedStar Health Research Institute Institutional Review Board approved protocol and all subjects gave written informed consent. Enrollment criteria included

any clinical indication for cardiac catheterization and ability to give informed consent. A case-control GWAS similar to PennCATH was performed in MedStar (n=1,322 Caucasians) composed of controls (n=447) who on coronary angiography showed no evidence of CAD and CAD (AngCAD) cases (n=875) with one or more coronary vessels with  $\geq 50\%$  stenosis divided into AngCADMI+ cases (n=421) and AngCADMI- cases (n=454). Controls were aged over 45 in men and women. Cases were selected to be young with age at diagnosis of CAD  $< 55$  for males and  $< 60$  for females. Further details of the MedStar study can be found elsewhere <sup>5,6</sup>.

**PennCATH.** PennCATH is a University of Pennsylvania Medical Center based coronary angiographic study. Briefly, PennCATH, recruited between July 1998 and March 2003, provides an ongoing focus for analyzing the association of biochemical and genetic factors with coronary atherosclerosis in a consecutive cohort of patients undergoing cardiac catheterization and coronary angiography. A total of 3,850 subjects provided written informed consent in a Penn Institutional Review Board approved protocol. Enrollment criteria included any clinical indication for cardiac catheterization and ability to give informed consent.

A nested case-control GWAS was performed in PennCATH (n=1,401 Caucasians) composed of controls (n=468) who on coronary angiography showed no or minimal ( $< 10\%$  stenosis of any vessel) evidence of CAD and angiographic CAD (AngCAD) cases (n=933) with one or more coronary vessels with  $\geq 50\%$  stenosis. AngCAD cases were equally selected for cases with MI (AngCADMI+ cases; n=469) and cases without history or presentation with MI (AngCADMI- cases; n=464). Controls were aged over 40 in men and 45 in women. Cases were selected to be young  $< 60$  for males and  $< 65$  for females. Further details of the PennCATH study can be found elsewhere <sup>5,6</sup>.

**The MIGen consortium.** The Myocardial Infarction Genetics (MIGen) Consortium consists of 1,274 cases of early-onset MI (in men  $\leq 50$  years of age or women  $\leq 60$  years of age) and 1,407

SUPPLEMENTAL MATERIAL: A genome-wide association study identifies LIPA as a susceptibility gene for coronary artery disease

age- and sex- matched controls free of MI from five international sites: Boston and Seattle in the United States as well as Sweden, Finland. The five studies include Heart Attack Risk in Puget Sound (505 cases/ 559 controls), Registre Gironi del Cor (312/ 317), the Massachusetts General Hospital Premature Coronary Artery Disease Study (204/ 260), FINRISK (167/ 172), and Malmö Diet and Cancer (86/ 99). Each of the studies have been previously described 5-10. At each site, MI was diagnosed on the basis of autopsy evidence of fatal MI or a combination of chest pain, electrocardiographic evidence of MI, or elevation of one or more cardiac *biomarkers (creatinine kinase or cardiac troponin)*. Further details of the MIGen consortium can be found elsewhere <sup>6</sup>.

**WTCCC-CAD.** For the Wellcome Trust Case Control Consortium for Coronary Artery Disease (WTCCC-CAD), cases were recruited from families of European descent with a strong familial basis of CAD, where cases (one per family) had a validated history of either MI or coronary revascularization (CABG or PCI) before the age of 66. Recruitment was carried out on a national basis in the UK. Controls were ascertained from two UK collections, namely the UKBS collection of Common Controls Panel 1 (UKBS-CC1 collection), and the 1985 Birth cohort. Further details of the WTCCC-CAD study can be found elsewhere.<sup>3, 7</sup>

*c. Description of wet lab replication cohorts*

Wet lab replication studies consisted of cases with CAD/MI and matched controls from 6 studies. All participants were European ancestry. The 6 studies were: Etude Cas-Témoin sur l'Infarctus du Myocarde (ECTIM), Genetische Epidemiologie in der Kardiologie (GoKard) Study, popgen study , Monica Risk, Genetics, Archiving and Monograph (MORGAM) study, Angio-Lueb study and the Ludwigshafen Risk and Cardiovascular Health (LURIC) study.

**AngioLueb.** The Luebeck angiographic study includes 2,843 patients with angiographically proven CAD who underwent cardiac catheterization at the University Hospital Schleswig-



Holstein, Campus Lübeck between 2005 and 2007 (Lübeck angiographic registry of patients with structural heart disease). Patients were not selected for particular risk factors or phenotypes. Controls came from the KORA F3 populations based study. Further details of the AngioLueb can be found elsewhere <sup>4</sup>.

**ECTIM.** The ECTIM (Etude Cas-Témoin sur l'Infarctus du Myocarde) Study is a case-control study of MI based on the MONICA (Multinational MONItoring of trends and determinants in Cardiovascular disease) project registers in the United-Kingdom, including Northern Ireland and France. 1,169 MI patients were recruited 3 to 9 months after the event and had to satisfy the WHO criteria for definite acute MI (category I). In each centre, controls (n=1,193) of similar age and sex were randomly selected in the areas covered by the MONICA registers. Further details of the ECTIM study can be found elsewhere <sup>8,9</sup>.

**GoKard.** The GoKard cohort included n=1,161 cases with angiographically proven CAD, who underwent coronary angiography because of chest pain or any other clinical reason requiring angiography at the cardiology department at the University of Regensburg. Controls (n=341) were free of CAD. The study was approved by the ethics committee of the University of Regensburg (Reg Nr. 06211).

**LURIC.** The LURIC (LUdwigshafen Risk and Cardiovascular Health) study included 2,279 consecutive white patients hospitalized for coronary angiography between June 1997 and May 2001. The 1,344 controls were from the GerBS (German Blood Service) control series that consists of healthy, unrelated blood donors. They were recruited from the Southwestern area of Germany which corresponds to the geographical origin of the LURIC patients. During May to July 2004 blood samples were taken by the Institute of Transfusion Medicine and Immunology

(Mannheim, Germany). According to the German guidelines for blood donation all blood donors were examined to rule out cardiovascular, malignant, and other diseases by a standard questionnaire, cardiac auscultation, blood pressure and pulse measurement. Blood donors with known disease were excluded from blood donation. Further details of the LURIC study can be found elsewhere <sup>10</sup>.

**MORGAM.** MORGAM is a prospective follow-up of the respondents of representative population samples that were examined at baseline. The cohorts providing DNA samples for this study are Alpha-Tocopherol, Beta-Carotene Cancer Prevention (ATBC) Study, FINRISK, Prospective Epidemiological Study of Myocardial Infarction (PRIME), Northern Sweden MONICA Study and MONICA-KORA Augsburg. For its genetic component, MORGAM has a case-cohort design. Further details of the MORGAM study can be found elsewhere <sup>11</sup>. For the purposes of this study, cases are those who had a documented MI before the baseline examination. Controls were selected from the MORGAM case-cohort set in such a way that the sets of cases and controls from each cohort would be similar in size and comparable with respect to age and sex. A control was selected for each case in random from those who were at risk at the age of the case at baseline. The risk set, from which the controls were selected, constituted of those members of the random subcohort of the MORGAM case-cohort set who: (i) had not had documented or self-reported MI or stroke at baseline; and (ii) had not had definite or possible AMI, unstable angina or cardiac revascularization during follow-up before the age of the case; and (iii) were in the follow-up at the age of the case; and (iv) had not been selected as a control at an earlier stage. There is a slight overlap in the current study between the MORGAM wet lab replication cohort and MIGen in silico replication cohort 5 MI-cases and 1 control of FINRISK were included in both data sets.

**popgen.** The popgen sample comprised unrelated German CAD patients who were recruited in Schleswig-Holstein, the northernmost region in Germany, through the population-based popgen

biobank ([www.popgen.de](http://www.popgen.de)). In the recruitment area, all coronary angiograms of any of the five cardiac catheterization laboratories were screened. Study subjects were required to have coronary catheterization demonstrating significant CHD (at least a 70% stenosis in one major epicardial coronary vessel). 1,104 cases had a diagnosed disease onset <55 years, of whom a subset of 596 individuals had suffered a myocardial infarction. The majority had a history of severe CHD and had undergone a coronary revascularization procedure (percutaneous coronary intervention or coronary artery bypass grafting). Written informed consent was obtained from all participants and the recruitment and the experimental protocols were approved by the institutional ethics review board and data protection authorities.

The controls for the GWAS were recruited from the popgen biobank (popgen controls) and the Max Rubner-Institut, Bundesforschungsinstitut für Ernährung und Lebensmittel, Germany (MRI controls). In brief, they were randomly identified on the basis of the population registry of Schleswig-Holstein (n = 736) and by the Blood Service of the University Hospital Schleswig-Holstein (n = 621). All controls underwent a physical examination and a clinical checkup. Information on physical risk factors was obtained from a questionnaire. MRI controls were selected by age from the general population via the registration register of the region surrounding and encompassing the city of Kiel, Germany. Inclusion criteria were age 45-65 years and absence of self-reported diabetes. Exclusion criteria were intake of hormones or lipid-lowering medication, surgery of the intestinal tract in the last 3 months or other alterations of the gastrointestinal tract, malassimilation, active cancer, chronic renal or liver disease, anemia and alcohol abuse. All subjects gave written informed consent before participating. The study was approved by the Medical Ethical Committee of the University Clinic Kiel. Further details of the popgen study can be found elsewhere <sup>12</sup>.

#### *d. Informed Consent*

Participants from all studies gave written informed consent in accordance with the guidelines of the local ethics committees.

*e. Definition of cardiovascular risk factors and assessment of phenotypes of subclinical atherosclerosis*

For investigation of the association of eQTLs with prevalent classical cardiovascular risk factors and clinical variables, we used data from a computer-assisted personal interview, blood pressure, and anthropometric measurements and laboratory examinations from a venous blood sample. Cardiovascular risk factors were defined as follows: Hypertension was diagnosed, if antihypertensive drugs were taken, or a mean systolic blood pressure of  $\geq 140$  mmHg or a mean diastolic blood pressure of  $\geq 90$  mmHg was present in the 2<sup>nd</sup> and 3<sup>rd</sup> standardized measurement after 8 and 11 minutes of rest. Smoking was dichotomized into non-smokers (never and former smokers) and smokers. Obesity was defined as a body-mass index  $\geq 30$  m<sup>2</sup>/kg. Diabetes mellitus was defined in individuals with a blood glucose level of  $\geq 126$  mg/dl in the baseline examination after an overnight fast of at least 8 hours or a blood glucose level of  $\geq 200$  mg/dl in the baseline examination after a fasting period  $< 8$  hours or definite diagnosis of diabetes by a physician. Dyslipidemia was defined as a LDL/HDL-ratio of  $> 3.5$  or a definite diagnosis of dyslipidemia by a physician. A positive family history was defined as history of myocardial infarction in a female first-degree relative  $\leq 65$  years or a male first-degree relative  $\leq 60$  years.

The systemic atherosclerotic burden was evaluated by examination for present carotid macroangiopathy and measurement of endothelium-dependent, flow-mediated dilation. Carotid macroangiopathy was assessed in the common carotid artery, the internal and the external carotid artery by ultrasound with an ie33 ultrasound system (Philips, NL) using an 11 to 3 MHz linear array transducer. Plaques were defined as thickening of the IMT of at least 1.5 mm. The number of plaques from both sides was recorded. Subjects were classified as having macroangiopathy when at least one plaque was measured on either side.

Endothelium-dependent, flow-mediated dilation of the right brachial artery (FMD) was examined by two-dimensional ultrasound with a 7.5–12MHz linear array transducer and an HD11 XE ultrasound system (Philips, NL) as described previously.<sup>13</sup> A 3.5" wide blood pressure cuff was inflated at the upper arm to 50mmHg above systolic blood pressure or at least 200mmHg for 5 min in order to induce a reactive hyperaemia after arterial occlusion. During occlusion, the transducer was carefully maintained in the identical position. Two-dimensional images and pulsed-Doppler flow velocity signals were obtained before and 60 s after arterial occlusion, approximately 5cm above the antecubital crease.

Image acquisition and analysis were performed in a blinded manner to participants' clinical data. In general, all examinations were taken out according to standard operating procedures (SOPs) by certified medical technical assistants.

Levels of total cholesterol, high-density lipoprotein cholesterol, triglycerides and glycated haemoglobin (HbA<sub>1c</sub>) were measured immediately after blood withdrawal by routine methods on an Architect c8000 System (Abbott Diagnostics, Wiesbaden, Germany). Low-density lipoprotein cholesterol was calculated by the Friedewald formula.

#### *f. Genotyping Methods*

##### **CADomics: Discovery GWA**

Genotyping was performed in individuals of European descent only and was conducted on the Affymetrix Genome-Wide Human SNP 6.0 Array between January 2008 and July 2008. Processing of DNA samples using the Affymetrix Genome-Wide Human SNP Nsp/Sty Assay 5.0 and hybridization was done in accordance with the manufactures' standard recommendations. Genotypes were determined using the Birdseed v2 calling algorithm. Only samples with a contrast QC $\geq$ 0.4 were included in the final genotype calling. Quality control on sample level comprised exclusion of samples with a call rate  $\leq$ 97%, deviation from expected heterozygosity

SUPPLEMENTAL MATERIAL: A genome-wide association study identifies LIPA as a susceptibility gene for coronary artery disease

by more than three standard deviations and relatedness based on identity by state distance measures. On marker level we excluded polymorphisms with call rate  $\leq 98\%$  in cases or controls, minor allele frequency  $\leq 0.01$  and deviation from Hardy-Weinberg equilibrium ( $P \leq 0.0001$ ). Cluster plots were inspected for all markers with  $P < 0.001$  in the GWA analysis. For statistical analysis an additive model without adjustments was used. The genomics control lambda was 1.06.

### ***In silico* Replication**

Studies were genotyped on the Affymetrix Mapping 500K Array Set, the Affymetrix Genome-Wide Human SNP 5.0 Array, or the Affymetrix Genome-Wide Human SNP 6.0 Array. Imputation of HapMap SNPs was performed using either IMPUTE or MACH. For detailed description refer to **Supplementary Table 3**.

### **Wet lab Replication**

*De novo* genotyping was attempted for 20 SNPs in 6 studies (ECTIM, Angio-Lueb, popGen, GoKard, MORGAM, LURIC) by 5' Nuclease assay (TaqMan technology) or iPLEX Mass ARRAY technology.

In the ECTIM, popGen, GoKard genotyping of 19 SNPs was conducted using TaqMan probes (Applied Biosystems, Darmstadt, Germany). Genotyping was performed on 384-well plates (popgen and GoKard) or 96-well plates (ECTIM). The Genotyping Master Mix (Applied Biosystems, Darmstadt, Germany) was used in a 5- $\mu$ L (popGen and GoKard) or 7- $\mu$ L (ECTIM) total reaction volume including 10-20 ng DNA per reaction. After PCR, genotypes were automatically attributed by measuring the allele-specific fluorescence in the ABI 7900HT Real-Time PCR System (Applied Biosystems, Darmstadt, Germany), using the SDS 2.3 software for allele discrimination (auto caller confidence level,  $\geq 95\%$ ). For technical reasons, no genotyping results were available in ECTIM, popGen and GoKard for SNP rs365302.

In LURIC all SNPs and in MORGAM 17 SNPs were genotyped using the iPLEX Mass ARRAY System and the iPLEX™ chemistry (Sequenom, San Diego, USA). One iPLEX multiplex reaction was designed by the Assay Design v.3.1.2. software. Primer extension products were loaded onto a 384-element chip using a nanoliter pipetting system (SpectroCHIP, SpectroPOINT Spotter Sequenom, San Diego, USA). The samples were analyzed in a MALDI TOF MS (matrix assisted laser desorption ionisation time of flight mass spectrometer, Bruker Daltonik GmbH, Leipzig, Germany). The resulting mass spectra were analyzed automatically for peak identification using the SpectroTYPER RT 3.4 software (Sequenom, San Diego, USA). For quality reasons 10% of the spectra were checked by two independent trained persons. In MORGAM, SNPs rs1348330, rs2782552 and rs17412370 were genotyped using the TaqMan technology as described above.

In AngioLueb, genotyping for 9 SNPs (rs1333049, rs7044859, rs7848524, rs4692845, rs1348330, rs16893523, rs13197670, rs2782552, and rs17412370) was performed with TaqMan technology as described above. Remaining 11 SNPs were genotyped using the iPLEX Mass ARRAY platform (Sequenom) as described above.

#### *g. Gene Expression Methods*

##### **Isolation of total RNA from Monocytes**

Isolation of total RNA and analysis of gene expression were performed as recently described.<sup>14</sup>. Separation of monocytes was conducted within 60 min after blood collection. Briefly, 8 mL blood was collected using the Vacutainer CPT Cell Preparation Tube System (BD, Heidelberg, Germany) and 400 µL Rosette Sep Monocyte Enrichment Cocktail (StemCell Technologies, Vancouver, Canada) was added immediately after blood collection. After separation, cells were washed twice in ice cold PBS buffer containing 2 mM EDTA. Success of monocyte separation was controlled using an ADVIA 2120 Analyzer (Siemens Healthcare Diagnostics, Eschborn,

Germany) for part of the samples. Total RNA from monocytes was isolated using Trizol extraction and purification by silica-based columns. Briefly, immediately after separation of monocytes, washed cells were resuspended in 1.5 mL Trizol Reagent (Invitrogen, Karlsruhe, Germany) and frozen at -20°C until isolation of RNA at the same day (maximal storage time 5 h). After thawing, samples were transferred into Phase Lock Gel Tubes (Eppendorf, Hamburg, Germany), 200  $\mu$ L chloroform was added and phases were separated by centrifugation at 4600 rpm for 15 min. Purification of total monocytes RNA was performed using the RNeasy Mini kit (Qiagen, Hilden, Germany) according to the manufacturer's Animal Cell Spin and RNA Cleanup protocol including an additional DNase digestion step. Total RNA was eluted in 20  $\mu$ L RNase-free water. Yield of RNA was checked spectrophotometrically by NanoDrop N-1000 measuring the OD260 as well as the ratio OD260 and OD280. The integrity of the total RNA was assessed through analysis on an Agilent Bioanalyzer 2100 (Agilent Technologies, Boeblingen, Germany).

#### **Analysis of the monocyte transcriptome (Global Gene Expression Analysis)**

For global gene expression analysis, only RNA with integrity (RIN) of  $\geq 7$  was used. Assessment of global gene expression was performed on 1,606 total RNA samples from monocytes using the Illumina HT-12 v3 BeadChip. RNA samples were processed in batches of 96 samples. Here, 200 ng of total RNA was reverse transcribed, amplified and biotinylated using the Illumina TotalPrep-96 RNA Amplification Kit (Ambion/Applied Biosystems, Darmstadt, Germany) according to the manufacturer's protocol. Steps of cDNA and cRNA purification were performed automatically using the MagMax Express96 magnetic particle processor (Applied Biosystems, Darmstadt, Germany). After amplification and purification cRNA was controlled on an Agilent Bioanalyzer 2100 (Agilent Technologies, Boeblingen, Germany). A Tecan InfiniTE M200 and a Tecan Freedom EVOlyzer (Tecan, Crailsheim, Germany) were used to determine concentration of cRNA and to perform dilution of each sample to 140 ng/ $\mu$ L automatically. 700 ng of each



biotinylated cRNA was hybridized to a single BeadChip at 58°C for 16-18 hours. After hybridization, BeadChips were washed and stained with 1 mg/mL Streptavidin-Cy3 conjugate (GE Healthcare/Amersham Bioscience; Germany), according to the manufacturer's Whole Genome Gene Expression with IntelliHyb Seal Protocol. BeadChips were scanned using the Illumina Bead Array Reader.

Raw data were pre-processed and quantile normalized using Beadstudio version 2.0. 1,494 arrays remained after removing technical replicates and arrays with hybridization problems. Transcripts were filtered based on detection p-values using negative controls present on the array. 21,305 transcripts with a detection  $P < 0.1$  in at least 50% of the arrays were considered expressed. Furthermore, transcripts that could not be mapped uniquely to the RefSeq genome were removed. The resulting 14,027 transcripts were transformed using the arcsinh function to stabilize variances.

### **Semi-Quantitative RT-PCR**

For "platform" validation of gene expression results, semi-quantitative real-time reverse transcriptase PCR (qRT-PCR) was performed on 119 monocytic total RNA samples of the GHSExpress Study that were not used for global gene expression analysis. For all subjects whose total RNA was used for qRT-PCR, GWA data were also available. Reverse transcription was performed in a total volume of 20  $\mu$ l including 20 ng total RNA with the High Capacity RNA-to-cDNA Master Mix (Applied Biosystems, Darmstadt, Germany) as recommended by the manufacturer. A sample without reverse transcriptase as negative control was included. Real-time PCR was performed in a total volume of 10  $\mu$ l on a 7900HT Real-Time PCR System (Applied Biosystems, Darmstadt, Germany) using TaqMan Gene Expression assays (Applied Biosystems, Darmstadt, Germany) as recommended by the manufacturer. Assays were selected according to the approximate location of Illumina probes within the gene sequence (LIPA:

SUPPLEMENTAL MATERIAL: A genome-wide association study identifies LIPA as a susceptibility gene for coronary artery disease

Hs01548819\_m1, GAPDH: Hs99999905\_m1) GAPDH was used as reference gene for normalization.

**Part B – Supplementary Tables**

**Supplementary Table 1. Characteristics of the GHSExpress Study**

|                                                          | <b>GHSExpress<br/>Total</b> |
|----------------------------------------------------------|-----------------------------|
| <b>No. of subjects</b>                                   | 1,494                       |
| Study basis –                                            | Population-based            |
| Ethnicity                                                | Caucasian                   |
| Country of origin                                        | Germany                     |
| Age range, y                                             | 35 - 74                     |
| Age, y                                                   | 55.2 ± 10.9                 |
| Female Gender, n (%)                                     | 732 (49.0)                  |
| Myocardial infarction n (%)                              | 32 (2.1)                    |
| <b>Cardiovascular risk factors</b>                       |                             |
| Diabetes mellitus, n (%)                                 | 112 (7.5)                   |
| Dyslipidemia, n (%)                                      | 388 (26.0)                  |
| Family history of MI, n (%)                              | 254 (17.0)                  |
| Hypertension , n (%)                                     | 740 (49.5)                  |
| Obesity, n (%)                                           | 331 (22.2)                  |
| Smoking                                                  |                             |
| Never, n (%)                                             | 670 (44.9)                  |
| Ex- smoker, n (%)                                        | 537 (36.0)                  |
| Smoker, n (%)                                            | 285 (19.1)                  |
| Body Mass Index, kg/m <sup>2</sup>                       | 26.9 ± 4.6                  |
| Total Cholesterol, mg/dl                                 | 225± 43                     |
| LDL-Cholesterol, mg/dl                                   | 142 ± 36                    |
| HDL-Cholesterol, mg/dl                                   | 57 ± 16                     |
| Trilycerides, mg/dl                                      | 129 ± 81                    |
| RR systolic, mmHg                                        | 132 ± 18                    |
| RR diastolic, mmHg                                       | 83 ± 10                     |
| HbA1c, %                                                 | 5.49 ± 0.74                 |
| <b>Phenotypes of subclinical atherosclerotic disease</b> |                             |
| Flow-mediated vasodilation, %                            | 8.40 ± 4.99                 |
| Carotid macroangiopathy (at least one plaque), n (%)     | 175 (11.7)                  |

**Supplementary Table 2A-M. Characteristics of the study samples for replication**

**A. GerMIFS I**

|                                                        | <b>Cases</b>                                                                                             | <b>Controls</b>  |
|--------------------------------------------------------|----------------------------------------------------------------------------------------------------------|------------------|
| <b>Number of subjects</b>                              | 875*                                                                                                     | 1,644*           |
| <b>Study characteristics</b>                           |                                                                                                          |                  |
| Study basis – Ascertainment scheme                     | MI (<65 yrs) with > 1 first-degree sibling with severe CAD (PTCA; MI; CABG), controls: population sample |                  |
| Ethnicity                                              | Caucasian                                                                                                |                  |
| Country of origin                                      | Germany                                                                                                  |                  |
| Age range (y) / Study criteria                         | 24 – 64 (cases)                                                                                          | 35-79 (controls) |
| Mean Age (y)                                           | 50.2 ± 7.9                                                                                               | 62.5 ± 10.1      |
| Gender (female, %)                                     | 32.5                                                                                                     | 50.8             |
| Myocardial infarction (%)                              | 100                                                                                                      | 0                |
| <b>Cardiovascular risk factors – Frequencies</b>       |                                                                                                          |                  |
| Diabetes mellitus (%)                                  | 12.3                                                                                                     | 11.0             |
| Dyslipidemia (%)                                       | 76.1                                                                                                     | 78.0             |
| Family history of MI (%)                               | 100                                                                                                      | 100              |
| Hypertension (%)                                       | 86.5                                                                                                     | 62.7             |
| Obesity (%)                                            | 23.7                                                                                                     | 29.8             |
| Smoking (%)                                            | 70.3**                                                                                                   | 49.3**           |
| <b>Cardiovascular risk factors – Continuous traits</b> |                                                                                                          |                  |
| Body Mass Index (kg/m <sup>2</sup> )                   | 27.5 ± 3.7                                                                                               | 28.1 ± 4.5       |
| LDL-Cholesterol (mg/dL)                                | 154.7 ± 42.5                                                                                             | na               |
| HDL-Cholesterol (mg/dL)                                | 50.3 ± 19.3                                                                                              | na               |
| RR systolic (mmHg)                                     | 138.4 ± 20.0                                                                                             | na               |
| RR diastolic (mmHg)                                    | 82.7 ± 10.3                                                                                              | na               |

\* number of patients available varied for the different characteristics

\*\*smoking ever

**B. GerMIFS II**

|                                                        | <b>Cases</b>                                                                    | <b>Controls</b> |
|--------------------------------------------------------|---------------------------------------------------------------------------------|-----------------|
| <b>Number of subjects</b>                              | 1,222*                                                                          | 1,298*          |
| <b>Study characteristics</b>                           |                                                                                 |                 |
| Study basis – Ascertainment scheme                     | cases: MI (<60 yrs); 59.4% with family history of CAD, cases: population sample |                 |
| Ethnicity                                              | Caucasian                                                                       |                 |
| Country of origin                                      | Germany                                                                         |                 |
| Age range (y) / Study criteria                         | 25 – 59(cases) 19-70(controls)                                                  |                 |
| Mean Age (y)                                           | 51.3 ± 7.6                                                                      | 51.2 ± 11.9     |
| Gender (female, %)                                     | 20.3                                                                            | 47.9            |
| Myocardial infarction (%)                              | 100                                                                             | 0               |
| <b>Cardiovascular risk factors – Frequencies</b>       |                                                                                 |                 |
| Diabetes mellitus (%)                                  | 15.5                                                                            | 3.5             |
| Dyslipidemia (%)                                       | 80.8                                                                            | 67.3            |
| Family history of MI (%)                               | 59.4                                                                            | na              |
| Hypertension (%)                                       | 88.1                                                                            | 41.7            |
| Obesity (%)                                            | 22.6                                                                            | na              |
| Smoking (%)                                            | 64.7**                                                                          | 55.6**          |
| <b>Cardiovascular risk factors – Continuous traits</b> |                                                                                 |                 |
| Body Mass Index (kg/m <sup>2</sup> )                   | 27.9 ± 4.0                                                                      | 27.4 ± 4.6      |
| LDL-Cholesterol (mg/dL)                                | 143.1 ± 41.0                                                                    | na              |
| HDL-Cholesterol (mg/dL)                                | 50.3 ± 15.46                                                                    | na              |
| RR systolic (mmHg)                                     | 135.0 ± 18.7                                                                    | na              |
| RR diastolic (mmHg)                                    | 83.0 ± 10.8                                                                     | na              |

\* number of patients available varied for the different characteristics

\*\*smoking ever

**C. Penn CATH**

|                                                        | <b>Cases*</b>                               | <b>Controls*</b> |
|--------------------------------------------------------|---------------------------------------------|------------------|
| <b>Number of subjects</b>                              | 933                                         | 468              |
| <b>Study characteristics</b>                           |                                             |                  |
| Study basis – Ascertainment scheme                     | hospital-based, cardiac catheterization lab |                  |
| Ethnicity                                              | Caucasian                                   |                  |
| Country of origin                                      | U.S.                                        |                  |
| Age range (y) / Study criteria                         | *                                           |                  |
| Mean Age (y)                                           | 52.7 ± 7.6**                                | 61.7 ± 9.6**     |
| Gender (female, %)                                     | 23.7                                        | 51.9             |
| Myocardial infarction (%)                              | 50.3                                        | 0                |
| <b>Cardiovascular risk factors – Frequencies</b>       |                                             |                  |
| Diabetes mellitus (%)                                  | 24.4                                        | 11.2             |
| Dyslipidemia (%)                                       | 80.2                                        | 62.3             |
| Family history of MI (%)                               | 48.7                                        | 29.2             |
| Hypertension (%)                                       | 61.3                                        | 49.2             |
| Obesity (%)                                            | 42.5                                        | 36.3             |
| Smoking (%)                                            | 45.8                                        | 34.8             |
| <b>Cardiovascular risk factors – Continuous traits</b> |                                             |                  |
| Body Mass Index (kg/m <sup>2</sup> )                   | 29.8 ± 5.6                                  | 28.9 ± 6.4       |
| LDL-Cholesterol (mg/dL)                                | 107.4 ± 36.2                                | 108.2 ± 32.3     |
| HDL-Cholesterol (mg/dL)                                | 42.8 ± 11.9                                 | 48.5 ± 14.9      |
| RR systolic (mmHg)                                     | na                                          | na               |
| RR diastolic (mmHg)                                    | na                                          | na               |

\*Cases: Age <66; Angiographic CAD >50% stenosis in at least 1 vessel

Controls: Age >45; Angiography normal or <10% stenosis in all vessels.

\*\* Age at first CAD (cases) or recruitment (controls)

**D. MedStar**

|                                                        | <b>Cases*</b>                               | <b>Controls*</b> |
|--------------------------------------------------------|---------------------------------------------|------------------|
| <b>Number of subjects</b>                              | 875                                         | 447              |
| <b>Study characteristics</b>                           |                                             |                  |
| Study basis – Ascertainment scheme                     | hospital-based, cardiac catheterization lab |                  |
| Ethnicity                                              | Caucasian                                   |                  |
| Country of origin                                      | U.S.                                        |                  |
| Age range (y) / Study criteria                         | *                                           |                  |
| Mean Age (y)                                           | 48.9 ± 6.4**                                | 59.7 ± 8.9**     |
| Gender (female, %)                                     | 33.0                                        | 54.6             |
| Myocardial infarction (%)                              | 48.1                                        | 0                |
| <b>Cardiovascular risk factors – Frequencies</b>       |                                             |                  |
| Diabetes mellitus (%)                                  | 31.2                                        | 19.0             |
| Dyslipidemia (%)                                       | 79.8                                        | 58.4             |
| Family history of MI (%)                               | 41.6                                        | 21.3             |
| Hypertension (%)                                       | 76.3                                        | 60.6             |
| Obesity (%)                                            | 52.3                                        | 50.0             |
| Smoking (%)                                            | 53.1                                        | 49.9             |
| <b>Cardiovascular risk factors – Continuous traits</b> |                                             |                  |
| Body Mass Index (kg/m <sup>2</sup> )                   | 31.7 ± 6.8                                  | 31.3 ± 7.9       |
| LDL-Cholesterol (mg/dL)                                | 101.2 ± 40.9                                | 105.7 ± 32.8     |
| HDL-Cholesterol (mg/dL)                                | 42.7 ± 13.9                                 | 49.9 ± 15.7      |
| RR systolic (mmHg)                                     | na                                          | na               |
| RR diastolic (mmHg)                                    | na                                          | na               |

\*Cases: Age <66; Angiographic CAD >50% stenosis in at least 1 vessel

Controls: Age >45; Angiography normal or <10% stenosis in all vessels.

\*\* Age at first CAD (cases) or recruitment (controls)

**E. MORGAM**

|                                                        | <b>Cases</b>              | <b>Controls</b>           |
|--------------------------------------------------------|---------------------------|---------------------------|
| <b>Number of subjects</b>                              | 512                       | 512                       |
| <b>Study characteristics</b>                           |                           |                           |
| Study basis – Ascertainment scheme                     |                           | Population-based          |
| Ethnicity                                              |                           | Caucasian                 |
| Country of origin                                      |                           | Finland, France, Sweden   |
| Age range (y) / Study criteria                         |                           | 40 – 75                   |
| Mean Age (y)                                           | 63.3 ± 5.8*               | 63.3 ± 5.8*               |
| Gender (female, %)                                     | 4.5                       | 4.5                       |
| Myocardial infarction (%)                              | 100                       | 0                         |
| <b>Cardiovascular risk factors – Frequencies</b>       |                           |                           |
| Diabetes mellitus (%)                                  | 11.9                      | 6.9                       |
| Dyslipidemia (%)                                       | 46.9                      | 44.5                      |
| Family history of MI (%)                               | na                        | na                        |
| Hypertension (%)                                       | 66.5                      | 64.1                      |
| Obesity (%)                                            | 26.4                      | 19.3                      |
| Smoking (%)                                            | 45.1                      | 59.2                      |
| <b>Cardiovascular risk factors – Continuous traits</b> |                           |                           |
| Body Mass Index (kg/m <sup>2</sup> )                   | 28.0 ± 4.0                | 27.1 ± 4.3                |
| LDL-Cholesterol (mg/dL)                                | 139.2 ± 34.8              | 139.2 ± 38.7              |
| HDL-Cholesterol (mg/dL)                                | 42.5 ± 11.6               | 46.4 ± 11.6               |
| RR systolic (mmHg)                                     | 140.8 ± 19.7 <sup>#</sup> | 141.6 ± 19.9 <sup>#</sup> |
| RR diastolic (mmHg)                                    | 82.7 ± 10.1 <sup>#</sup>  | 85.1 ± 11.2 <sup>#</sup>  |

\*Cases: age range and mean age refer to age at the baseline examination. The myocardial infarction took place before baseline examination.

Controls: age at baseline examination of the index case is used. This is the age which was used for matching the controls. Mean age of the controls at baseline examination, when the risk factors were measured, was 61.4 years.

<sup>#</sup>Mean of 1st and 2nd standardized measurements were used for blood pressure.



## F. WTCCC-CAD

|                                                        | Cases                                                                                                                  | Controls        |
|--------------------------------------------------------|------------------------------------------------------------------------------------------------------------------------|-----------------|
| <b>Number of subjects</b>                              | 1,926                                                                                                                  | 2,938           |
| <b>Study characteristics</b>                           |                                                                                                                        |                 |
| Study basis – Ascertainment scheme                     | CAD (<66 yrs) with ≥1 first-degree sibling validated for MI, PTCA, CABG or Angina, Controls: general population sample |                 |
| Ethnicity                                              | Caucasian                                                                                                              |                 |
| Country of origin                                      | UK                                                                                                                     |                 |
| Age range (y) / Study criteria                         | 26-66                                                                                                                  | 11-70           |
| Mean Age (y)                                           | 49.8 ± 7.7                                                                                                             | na <sup>Ψ</sup> |
| Gender (female, %)                                     | 20.7                                                                                                                   | 50.0            |
| Myocardial infarction (%)                              | 71.5                                                                                                                   | Na              |
| <b>Cardiovascular risk factors – Frequencies</b>       |                                                                                                                        |                 |
| Diabetes mellitus (%)                                  | 11.6                                                                                                                   | na              |
| Dyslipidemia (%)                                       | 80.0*                                                                                                                  | na              |
| Family history of MI (%)                               | Na                                                                                                                     | na              |
| Hypertension (%)                                       | 42.7†                                                                                                                  | na              |
| Obesity (%)                                            | 23.3#                                                                                                                  | na              |
| Smoking (%)                                            | 75.8§                                                                                                                  | na              |
| <b>Cardiovascular risk factors – Continuous traits</b> |                                                                                                                        |                 |
| Body Mass Index (kg/m <sup>2</sup> )                   | 27.6 ± 4.2                                                                                                             | na              |
| LDL-Cholesterol (mg/dL)                                | na                                                                                                                     | na              |
| HDL-Cholesterol (mg/dL)                                | na                                                                                                                     | na              |
| RR systolic (mmHg)                                     | na                                                                                                                     | na              |
| RR diastolic (mmHg)                                    | na                                                                                                                     | na              |

<sup>Ψ</sup> WTCCC-CAD controls comprised of an equal number of subjects from the 1958 Birth Cohort and from the National Blood Service (NBS) Donors. The latter were recruited in equal 10 years age bands from 11 to 70 yrs of age. Additional phenotypes are not available for these controls.

\*Hyperlipidemia (total cholesterol ≥200 mg/dl or LDL cholesterol ≥130 mg/dl or receiving lipid lowering treatment).

†Hypertension (systolic blood pressure ≥140 or diastolic blood pressure ≥90 or receiving treatment for these conditions)

#Obesity (body mass index > 30 kg/m<sup>2</sup>)

§Smoking (ever)

**G. MGen**

|                                                        | <b>Cases</b>                                         | <b>Controls</b> |
|--------------------------------------------------------|------------------------------------------------------|-----------------|
| <b>Number of subjects</b>                              | 1,274                                                | 1,407           |
| <b>Study characteristics</b>                           |                                                      |                 |
| Study basis – Ascertainment scheme                     | Hospital-based, community-based and population-based |                 |
| Ethnicity                                              | European ancestry                                    |                 |
| Country of origin                                      | U.S., Spain, Finland, or Sweden                      |                 |
| Age range (y) / Study criteria                         | Cases were men with MI at ages ≤50 and women ≤60     |                 |
| Mean Age (y)                                           | 42.4 ± 6.6                                           | 43.0 ± 7.8      |
| Gender (female, %)                                     | 37.2                                                 | 39.9            |
| Myocardial infarction (%)                              | 100                                                  | 0               |
| <b>Cardiovascular risk factors – Frequencies</b>       |                                                      |                 |
| Diabetes mellitus (%)                                  | 14.9*                                                | 3.0*            |
| Dyslipidemia (%)                                       | na*                                                  | na*             |
| Family history of MI (%)                               | na*                                                  | na*             |
| Hypertension (%)                                       | 50.5*                                                | 30.8*           |
| Obesity (%)                                            | na*                                                  | na*             |
| Smoking (%)                                            | 73.9*                                                | 41.7*           |
| <b>Cardiovascular risk factors – Continuous traits</b> |                                                      |                 |
| Body Mass Index (kg/m <sup>2</sup> )                   | 27,6 ± 5.2*                                          | 25.8 ± 4.4*     |
| LDL-Cholesterol (mg/dL)                                | na*                                                  | na*             |
| HDL-Cholesterol (mg/dL)                                | na*                                                  | na*             |
| RR systolic (mmHg)                                     | na*                                                  | na*             |
| RR diastolic (mmHg)                                    | na*                                                  | na*             |

\* The characteristics provided refer to the characteristics of the Heart Attack Risk in Puget Sound Study as part of the MGen consortium. Details on all cohorts included in the consortium are provided elsewhere.<sup>6</sup>

## H. AngioLueb

|                                                        | Cases                                                            | Controls     |
|--------------------------------------------------------|------------------------------------------------------------------|--------------|
| <b>Number of subjects</b>                              | 2,843                                                            | 1,563        |
| <b>Study characteristics</b>                           |                                                                  |              |
| Study basis – Ascertainment scheme                     | hospital-based, angiographic cases and population-based controls |              |
| Ethnicity                                              | Caucasian                                                        |              |
| Country of origin                                      | Germany                                                          |              |
| Age range (y) / Study criteria                         | 36 – 87                                                          | 35 -84       |
| Mean Age (y)                                           | 69 ± 12.5                                                        | 52.2 ± 13.4  |
| Gender (female, %)                                     | 21.0                                                             | 52.1         |
| Myocardial infarction (%)                              | 65                                                               | 0            |
| <b>Cardiovascular risk factors – Frequencies</b>       |                                                                  |              |
| Diabetes mellitus (%)                                  | 23.2                                                             | 5.3          |
| Dyslipidemia (%)                                       | 62.1                                                             | 67.8         |
| Family history of MI (%)                               | 28.3                                                             | 24.1         |
| Hypertension (%)                                       | 75.6                                                             | 39.5         |
| Obesity (%)                                            | 30.6                                                             | 23.4         |
| Smoking (%)                                            | 57.4                                                             | 57.6         |
| <b>Cardiovascular risk factors – Continuous traits</b> |                                                                  |              |
| Body Mass Index (kg/m <sup>2</sup> )                   | 28.3 ± 4.9                                                       | 27.1 ± 4.7   |
| LDL-Cholesterol (mg/dL)                                | na                                                               | 3.3 ± 0.8    |
| HDL-Cholesterol (mg/dL)                                | na                                                               | 1.5 ± 0.4    |
| RR systolic (mmHg)                                     | na                                                               | 127.4 ± 19.6 |
| RR diastolic (mmHg)                                    | na                                                               | 81.3 ± 10.7  |

**I. CHARGE**

|                                                        | <b>Cases</b>                                                                             | <b>Controls</b> |
|--------------------------------------------------------|------------------------------------------------------------------------------------------|-----------------|
| <b>Number of subjects</b>                              | 2,287                                                                                    | 22,024          |
| <b>Study characteristics</b>                           | 4 community-based cohorts<br>CAD cases: definite or probable MI, PTCA or CABG, or ECG MI |                 |
| Ethnicity                                              | Caucasian                                                                                |                 |
| Country of origin                                      | U.S. (ARIC, FHS), Iceland (AGES), Netherlands (RS)                                       |                 |
| Age range (y) / Study criteria                         |                                                                                          |                 |
| Mean Age (y)                                           | 60.0 ± 7.5                                                                               | 63.1 ± 7.6      |
| Gender (female, %)                                     | 33.4                                                                                     | 59.6            |
| Myocardial infarction (%)                              | 48.0                                                                                     | 0               |
| <b>Cardiovascular risk factors – Frequencies</b>       |                                                                                          |                 |
| Diabetes mellitus (%)                                  | na                                                                                       | na              |
| Dyslipidemia (%)                                       | na                                                                                       | na              |
| Family history of MI (%)                               | na                                                                                       | na              |
| Hypertension (%)                                       | na                                                                                       | na              |
| Obesity (%)                                            | na                                                                                       | na              |
| Smoking (%)                                            | na                                                                                       | na              |
| <b>Cardiovascular risk factors – Continuous traits</b> |                                                                                          |                 |
| Body Mass Index (kg/m <sup>2</sup> )                   | 28.1 ± 4.2                                                                               | 27.5 ± 7.0      |
| LDL-Cholesterol (mg/dL)                                | na                                                                                       | na              |
| HDL-Cholesterol (mg/dL)                                | na                                                                                       | na              |
| RR systolic (mmHg)                                     | na                                                                                       | na              |
| RR diastolic (mmHg)                                    | na                                                                                       | na              |

Details on all cohorts included in the consortium are provided elsewhere.<sup>2</sup>

AGES = Age, Gene/Environment Susceptibility Reykjavik Study; ARIC = Atherosclerosis Risk in Communities Study; FHS = Framingham Heart Study; RS = Rotterdam Study.

**J. GoKard**

|                                                        | <b>Cases</b> | <b>Controls</b> |
|--------------------------------------------------------|--------------|-----------------|
| <b>Number of subjects</b>                              | 1,111        | 391             |
| <b>Study characteristics</b>                           |              |                 |
| Study basis – Ascertainment scheme                     |              | hospital-based  |
| Ethnicity                                              |              | Caucasian       |
| Country of origin                                      |              | Germany         |
| Age range (y) / Study criteria                         |              | 20 – 85         |
| Mean Age (y)                                           | 66.8         | 59.6            |
| Gender (female, %)                                     | 22.7         | 45.3            |
| Myocardial infarction (%)                              | 41.4         | 0               |
| <b>Cardiovascular risk factors – Frequencies</b>       |              |                 |
| Diabetes mellitus (%)                                  | 31.6         | 17.6            |
| Dyslipidemia (%)                                       | 81.7         | 47.1            |
| Family history of MI (%)                               | n. a.        | n. a.           |
| Hypertension (%)                                       | 88.9         | 69.8            |
| Obesity (%)                                            | 29.5         | 32.1            |
| Smoking (%)                                            | 14.7         | 12.0            |
| <b>Cardiovascular risk factors – Continuous traits</b> |              |                 |
| Body Mass Index (kg/m <sup>2</sup> )                   | 28.1 ± 4.3   | 28.4 ± 5.6      |
| LDL-Cholesterol (mg/dL)                                | na           | na              |
| HDL-Cholesterol (mg/dL)                                | na           | na              |
| RR systolic (mmHg)                                     | na           | na              |
| RR diastolic (mmHg)                                    | na           | na              |

**K. ECTIM**

|                                                            | <b>Cases</b>                            | <b>Controls</b> |
|------------------------------------------------------------|-----------------------------------------|-----------------|
| <b>Number of subjects</b>                                  | 1,146                                   | 1,153           |
| <b>Study characteristics</b>                               |                                         |                 |
| Study basis – Ascertainment scheme                         | MONICA registers and community          |                 |
| Ethnicity                                                  | Caucasian                               |                 |
| Country of origin                                          | France, Northern Ireland, Scotland (UK) |                 |
| Age range (y) / Study criteria                             | 27 – 72                                 |                 |
| Mean Age (y)                                               | 55.5 ± 8.3                              | 55.8 ± 8.4      |
| Gender (female, %)                                         | 22.4                                    | 21.9            |
| Myocardial infarction (%)                                  | 100                                     | 0               |
| <b>Cardiovascular risk factors –<br/>Frequencies</b>       |                                         |                 |
| Diabetes mellitus (%)                                      | 11.2                                    | 4.7             |
| Dyslipidemia (%)                                           | 24.8                                    | 4.7             |
| Family history of MI (%)                                   | 38.5                                    | 28.0            |
| Hypertension (%)                                           | 92.9                                    | 36.7            |
| Obesity (%)                                                | 19.7                                    | 20.4            |
| Smoking (%)                                                | 54.9                                    | 31.8            |
| <b>Cardiovascular risk factors –<br/>Continuous traits</b> |                                         |                 |
| Body Mass Index (kg/m <sup>2</sup> )                       | 27.0 ± 4.2                              | 26.8 ± 4.2      |
| LDL-Cholesterol (mg/dL)                                    | 152.9 ± 39.5                            | 150.1 ± 37.7    |
| HDL-Cholesterol (mg/dL)                                    | 42.8 ± 11.3                             | 50.9 ± 16.3     |
| RR systolic (mmHg)                                         | 127.4 ± 21.6                            | 135.5 ± 22.2    |
| RR diastolic (mmHg)                                        | 77.2 ± 11.9                             | 82.1 ± 12.7     |

**L. LURIC**

|                                                        | <b>Cases</b> | <b>Controls</b> |
|--------------------------------------------------------|--------------|-----------------|
| <b>Number of subjects</b>                              | 2,583        | 733             |
| <b>Study characteristics</b>                           |              |                 |
| Study basis – Ascertainment scheme                     |              | hospital-based  |
| Ethnicity                                              |              | Caucasian       |
| Country of origin                                      |              | Germany         |
| Age range (y) / Study criteria                         |              | 17 – 92         |
| Mean Age (y)                                           | 64           | 58              |
| Gender (female, %)                                     | 25           | 48              |
| Myocardial infarction (%)                              | 63.1         | 0.3             |
| <b>Cardiovascular risk factors – Frequencies</b>       |              |                 |
| Diabetes mellitus (%)                                  | 35.8         | 19.1            |
| Dyslipidemia (%)                                       | 71.5         | 57.3            |
| Family history of MI (%)                               | 10.8         | 10.0            |
| Hypertension (%)                                       | 75.4         | 63.4            |
| Obesity (%)                                            | 23.6         | 21.8            |
| Smoking (%)                                            | 20.1         | 18.4            |
| <b>Cardiovascular risk factors – Continuous traits</b> |              |                 |
| Body Mass Index (kg/m <sup>2</sup> )                   | 27.5 ± 4.0   | 27.4 ± 4.3      |
| LDL-Cholesterol (mg/dL)                                | 115.0 ± 35.0 | 120.0 ± 33.0    |
| HDL-Cholesterol (mg/dL)                                | 38.0 ± 10.0  | 43.0 ± 12.0     |
| RR systolic (mmHg)                                     | 142.5 ± 23.8 | 136.2 ± 22.4    |
| RR diastolic (mmHg)                                    | 81.2 ± 11.5  | 80.3 ± 11.3     |

**M. popgen**

|                                                            | <b>Cases*</b>             | <b>Controls*</b> |
|------------------------------------------------------------|---------------------------|------------------|
| <b>Number of subjects</b>                                  | 2,200                     | 3,166            |
| <b>Study characteristics</b>                               |                           |                  |
| Study basis – Ascertainment scheme                         | community based           | community based  |
| Ethnicity                                                  |                           | Caucasian        |
| Country of origin                                          |                           | Germany          |
| Age range (y) / Study criteria                             | Cases with MI:<br>24 - 74 | 19 - 77          |
| Mean Age (y)                                               | 51.0 ± 6.2                | 52.3 ± 10.5      |
| Gender (female, %)                                         | 19.0                      | 18.7             |
| Myocardial infarction (%)                                  | 66.2                      | 2.1              |
| <b>Cardiovascular risk factors –<br/>Frequencies</b>       |                           |                  |
| Diabetes mellitus (%)                                      | 19.0                      | 1.6              |
| Dyslipidemia (%)                                           | 14.5                      | 16.0             |
| Family history of MI (%)                                   | 18.2                      | Na               |
| Hypertension (%)                                           | 74.5                      | 41.6             |
| Obesity (%)                                                | 27.8                      | 15.1             |
| Smoking (%)                                                | 74.3                      | 35.1             |
| <b>Cardiovascular risk factors –<br/>Continuous traits</b> |                           |                  |
| Body Mass Index (kg/m <sup>2</sup> )                       | 27.7 ± 3.3                | 26.3 ± 3.2       |
| LDL-Cholesterol (mg/dL)                                    | 134.0 ± 36.4              | 133.6 ± 32.4     |
| HDL-Cholesterol (mg/dL)                                    | 44.0 ± 11.7               | 59.3 ± 13.5      |
| RR systolic (mmHg)                                         | na                        | 132.7 ± 13.8     |
| RR diastolic (mmHg)                                        | na                        | 81.7 ± 7.9       |



**Supplementary Table 3. Genotyping platforms and imputation methods of *in silico* replication studies**

|                                          | <b>GerMIFS I</b>                  | <b>GerMIFS II</b>                          | <b>Penn CATH</b>                           | <b>MedStar</b>                             | <b>WTCCC-CAD</b>                  | <b>MIGen</b>                                  | <b>CHARGE</b>                                                    |
|------------------------------------------|-----------------------------------|--------------------------------------------|--------------------------------------------|--------------------------------------------|-----------------------------------|-----------------------------------------------|------------------------------------------------------------------|
| <b>Genotyping</b>                        |                                   |                                            |                                            |                                            |                                   |                                               |                                                                  |
| GWA platform                             | Affymetrix Mapping 500k Array Set | Affymetrix Genome-Wide Human SNP Array 6.0 | Affymetrix Genome-Wide Human SNP Array 6.0 | Affymetrix Genome-Wide Human SNP Array 6.0 | Affymetrix Mapping 500k Array Set | Affymetrix Genome-Wide Human SNP Array 6.0    | several Affymetrix and Illumina*                                 |
| Calling Algorithm                        | BRLMM                             | Birdseed v2                                | Birdseed                                   | Birdseed v2                                | CHIAMO                            | Birdseed                                      | Birdseed/BRLMM/BeaStudio                                         |
| <b>QC filters before imputation</b>      |                                   |                                            |                                            |                                            |                                   |                                               |                                                                  |
| Sample call rate                         | MIND > 0.98                       | MIND > 0.98                                | MIND > 0.95                                | MIND > 0.95                                | MIND ≥ 0.98                       | >0.95                                         | >0.95-0.98*                                                      |
| SNP call rate                            | GENO > 0.98                       | GENO > 0.98                                | GENO > 0.95                                | GENO > 0.95                                | GENO > 0.98                       | >0.95                                         | >0.90-0.97*                                                      |
| HWE p-value                              | 10 <sup>-4</sup> in controls      | 10 <sup>-4</sup> in controls               | 10 <sup>-6</sup> in controls               | 10 <sup>-6</sup> in controls               | 10 <sup>-4</sup> in controls      | 10 <sup>-6</sup> in controls                  | 10 <sup>-6</sup> *                                               |
| MAF                                      | > 0.01                            | > 0.01                                     | > 0.01                                     | > 0.01                                     | > 0.01                            | > 0.01                                        | > 0.01*                                                          |
| <b>Imputation</b>                        |                                   |                                            |                                            |                                            |                                   |                                               |                                                                  |
| No. SNPs for imputation [autosomal SNPs] | all matching QC filters           | all matching QC filters                    | 659,760                                    | 678,707                                    | 477,459                           | 727,496                                       | various (depending on GWA platform)*                             |
| NCBI build, HapMap CEU                   | 36                                | 36                                         | 36                                         | 36                                         | 36                                | 36                                            | 35/36*                                                           |
| Software for imputation                  | MACH                              | MACH                                       | MACH 1.0                                   | MACH 1.0                                   | IMPUTE                            | MACH / 35                                     | MACH*                                                            |
| <b>Statistical Analysis</b>              |                                   |                                            |                                            |                                            |                                   |                                               |                                                                  |
| No. SNPs for analysis                    | 2,543,887                         | 2,543,887                                  | 2,659,852                                  | 2,433,405                                  | 2,614,446                         | 2,557,744                                     | ~ 2,500,000                                                      |
| Model                                    | Additive                          | Additive                                   | Log-Additive PLINK                         | Log-Additive PLINK                         | Additive                          | Log-Additive PLINK                            | Additive*                                                        |
| Software                                 | PLINK                             | PLINK                                      | (genotyped); SNPTest (imputed)             | (genotyped); SNPTest (imputed)             | SNPTest                           | (genotyped); SNPTest (imputed)                | 2*                                                               |
| Adjustments                              | unadjusted                        | unadjusted                                 | unadjusted                                 | unadjusted                                 | unadjusted                        | Age, gender, principal components of ancestry | adjusted for age and sex in all; for individual study as needed* |
| QC filters [imputed data]                | --                                | --                                         | IC ≥ 0.50; R2>0.3                          | IC ≥ 0.50; R2>0.3                          | --                                | --                                            | 2*                                                               |
| genomics control lambda                  | 1.02 (genotyped)                  | 1.04 (genotyped)                           | 0.993 (genotyped)                          | 0.991 (genotyped)                          | 1.05 (genotyped)                  | 1.01 (genotyped)                              | 2*                                                               |

\*Further genotyping details in the individual cohorts in the CHARGE Consortium are described elsewhere.<sup>2</sup>

**Supplementary Table 4. Genome-Wide Association Analysis of Coronary Artery Disease: SNPs associated with CAD at a level of significance of  $P < 10^{-3}$  in the discovery GWAS and respective P-value of the pooled analysis of GWAS and *in silico* replication stage.**

| SNP        | Chr | Position (bp) | Gene                      | Risk/NonRisk Allele | Risk frequency | GWA                    |                    | Pooled analysis        |                    |
|------------|-----|---------------|---------------------------|---------------------|----------------|------------------------|--------------------|------------------------|--------------------|
|            |     |               |                           |                     |                | P Value                | OR (95% CI)        | P Value                | OR (95% CI)        |
| rs17390062 | 1   | 3079709       | PRDM16                    | T/C                 | 0.9116         | $5.26 \times 10^{-05}$ | 1.28 (1.10 - 1.48) | $2.01 \times 10^{-04}$ | 1.15 (1.07 - 1.24) |
| rs12135834 | 1   | 5209527       | intergenic                | C/T                 | 0.4970         | $7.50 \times 10^{-04}$ | 1.15 (1.06 - 1.24) | $2.00 \times 10^{-02}$ | 1.05 (1.01 - 1.10) |
| rs6686714  | 1   | 5210469       | intergenic                | G/T                 | 0.4993         | $8.90 \times 10^{-04}$ | 1.14 (1.06 - 1.24) | $6.57 \times 10^{-02}$ | 1.04 (1.00 - 1.08) |
| rs7535812  | 1   | 18659366      | intergenic                | G/C                 | 0.2657         | $1.12 \times 10^{-04}$ | 1.16 (1.06 - 1.27) | $9.23 \times 10^{-01}$ | 1.00 (0.96 - 1.05) |
| rs829406   | 1   | 21822049      | RAP1GAP                   | G/A                 | 0.1179         | $9.04 \times 10^{-04}$ | 1.23 (1.09 - 1.39) | $4.81 \times 10^{-01}$ | 1.02 (0.96 - 1.09) |
| rs6679565  | 1   | 21835138      | RAP1GAP                   | A/G                 | 0.1187         | $2.13 \times 10^{-04}$ | 1.26 (1.11 - 1.42) | $1.90 \times 10^{-02}$ | 1.11 (1.02 - 1.21) |
| rs9793263  | 1   | 46494976      | RAD54L, C1orf190          | A/G                 | 0.3973         | $5.33 \times 10^{-04}$ | 1.15 (1.06 - 1.25) | $2.40 \times 10^{-01}$ | 1.03 (0.98 - 1.08) |
| rs12410307 | 1   | 46502985      | RAD54L, C1orf190          | A/G                 | 0.0900         | $1.94 \times 10^{-04}$ | 1.30 (1.13 - 1.49) | $1.39 \times 10^{-02}$ | 1.09 (1.02 - 1.17) |
| rs581554   | 1   | 54386997      | CDCP2                     | C/T                 | 0.7299         | $7.91 \times 10^{-04}$ | 1.17 (1.06 - 1.28) | $1.06 \times 10^{-01}$ | 1.03 (0.99 - 1.08) |
| rs625643   | 1   | 54409755      | CDCP2,<br>AL357673.12-202 | C/T                 | 0.7464         | $3.23 \times 10^{-04}$ | 1.17 (1.07 - 1.29) | $1.32 \times 10^{-01}$ | 1.03 (0.99 - 1.08) |
| rs17302852 | 1   | 61047387      | intergenic                | C/T                 | 0.0272         | $9.87 \times 10^{-04}$ | 1.50 (1.18 - 1.91) | $1.42 \times 10^{-01}$ | 1.13 (0.96 - 1.34) |
| rs6659197  | 1   | 66012485      | intergenic                | C/A                 | 0.4021         | $8.25 \times 10^{-05}$ | 1.14 (1.05 - 1.24) | $2.10 \times 10^{-02}$ | 1.05 (1.01 - 1.09) |
| rs12060353 | 1   | 78774508      | PTGFR                     | T/G                 | 0.8068         | $7.28 \times 10^{-04}$ | 1.20 (1.08 - 1.33) | $6.32 \times 10^{-02}$ | 1.06 (1.00 - 1.13) |
| rs12074883 | 1   | 78775132      | PTGFR                     | C/T                 | 0.8070         | $2.94 \times 10^{-04}$ | 1.21 (1.09 - 1.34) | $1.67 \times 10^{-01}$ | 1.04 (0.98 - 1.10) |
| rs12133510 | 1   | 78994263      | intergenic                | G/A                 | 0.6810         | $2.31 \times 10^{-04}$ | 1.17 (1.07 - 1.28) | $2.97 \times 10^{-02}$ | 1.04 (1.00 - 1.09) |
| rs6694893  | 1   | 79071703      | intergenic                | T/A                 | 0.7627         | $6.30 \times 10^{-04}$ | 1.18 (1.07 - 1.30) | $2.47 \times 10^{-01}$ | 1.03 (0.98 - 1.08) |
| rs6680564  | 1   | 79073527      | intergenic                | A/C                 | 0.7624         | $5.40 \times 10^{-04}$ | 1.18 (1.08 - 1.30) | $2.52 \times 10^{-01}$ | 1.03 (0.98 - 1.08) |
| rs12026347 | 1   | 79076338      | intergenic                | C/T                 | 0.6880         | $8.83 \times 10^{-04}$ | 1.16 (1.06 - 1.27) | $2.32 \times 10^{-01}$ | 1.03 (0.98 - 1.07) |
| rs17411879 | 1   | 79130799      | ELTD1                     | A/C                 | 0.7707         | $3.52 \times 10^{-04}$ | 1.20 (1.08 - 1.32) | $1.02 \times 10^{-01}$ | 1.04 (0.99 - 1.08) |
| rs1352556  | 1   | 79233222      | ELTD1                     | C/G                 | 0.5747         | $9.26 \times 10^{-04}$ | 1.15 (1.06 - 1.25) | $1.45 \times 10^{-02}$ | 1.05 (1.01 - 1.10) |
| rs12117862 | 1   | 81882643      | LPHN2                     | T/C                 | 0.8584         | $1.11 \times 10^{-04}$ | 1.22 (1.09 - 1.37) | $3.41 \times 10^{-02}$ | 1.07 (1.01 - 1.14) |
| rs1413536  | 1   | 88195985      | intergenic                | T/C                 | 0.4997         | $1.64 \times 10^{-04}$ | 1.16 (1.07 - 1.26) | $6.01 \times 10^{-02}$ | 1.04 (1.00 - 1.08) |
| rs1334331  | 1   | 88213654      | intergenic                | A/C                 | 0.3488         | $1.18 \times 10^{-04}$ | 1.17 (1.07 - 1.27) | $2.89 \times 10^{-01}$ | 1.02 (0.98 - 1.06) |
| rs1932757  | 1   | 88437917      | intergenic                | C/T                 | 0.1819         | $7.08 \times 10^{-05}$ | 1.23 (1.11 - 1.37) | $1.06 \times 10^{-01}$ | 1.04 (0.99 - 1.09) |
| rs10493803 | 1   | 88446264      | intergenic                | T/G                 | 0.1692         | $1.85 \times 10^{-04}$ | 1.20 (1.08 - 1.34) | $1.88 \times 10^{-01}$ | 1.03 (0.98 - 1.08) |
| rs12403601 | 1   | 88447133      | intergenic                | T/G                 | 0.1691         | $2.14 \times 10^{-04}$ | 1.20 (1.08 - 1.34) | $1.96 \times 10^{-01}$ | 1.03 (0.98 - 1.08) |
| rs10923044 | 1   | 88454168      | intergenic                | C/T                 | 0.1768         | $7.72 \times 10^{-05}$ | 1.22 (1.10 - 1.36) | $7.22 \times 10^{-02}$ | 1.05 (1.00 - 1.10) |
| rs4300194  | 1   | 88472538      | intergenic                | C/T                 | 0.1695         | $1.16 \times 10^{-04}$ | 1.21 (1.09 - 1.35) | $8.74 \times 10^{-02}$ | 1.05 (0.99 - 1.11) |

| SNP        | Chr | Position (bp) | Gene                    | Risk/NonRisk Allele | Risk frequency | GWA                    |                    | Pooled analysis        |                    |
|------------|-----|---------------|-------------------------|---------------------|----------------|------------------------|--------------------|------------------------|--------------------|
|            |     |               |                         |                     |                | P Value                | OR (95% CI)        | P Value                | OR (95% CI)        |
| rs12730130 | 1   | 88474179      | intergenic              | A/T                 | 0.1702         | 1.21*10 <sup>-04</sup> | 1.21 (1.09 - 1.35) | 7.35*10 <sup>-02</sup> | 1.05 (1.00 - 1.11) |
| rs569619   | 1   | 88514598      | intergenic              | T/G                 | 0.1644         | 1.36*10 <sup>-04</sup> | 1.22 (1.09 - 1.36) | 4.86*10 <sup>-02</sup> | 1.06 (1.00 - 1.12) |
| rs608410   | 1   | 88543251      | intergenic              | T/C                 | 0.2688         | 7.44*10 <sup>-04</sup> | 1.17 (1.07 - 1.28) | 9.55*10 <sup>-02</sup> | 1.04 (0.99 - 1.08) |
| rs591604   | 1   | 88551814      | intergenic              | A/G                 | 0.3192         | 1.90*10 <sup>-04</sup> | 1.18 (1.08 - 1.28) | 3.49*10 <sup>-01</sup> | 1.02 (0.98 - 1.06) |
| rs589824   | 1   | 88552213      | intergenic              | C/T                 | 0.3354         | 6.17*10 <sup>-05</sup> | 1.18 (1.09 - 1.29) | 3.60*10 <sup>-01</sup> | 1.02 (0.98 - 1.06) |
| rs555994   | 1   | 88553150      | intergenic              | C/T                 | 0.2446         | 1.11*10 <sup>-05</sup> | 1.21 (1.10 - 1.32) | 2.12*10 <sup>-01</sup> | 1.03 (0.98 - 1.08) |
| rs473821   | 1   | 88553930      | intergenic              | C/T                 | 0.2624         | 3.09*10 <sup>-06</sup> | 1.21 (1.11 - 1.33) | 1.95*10 <sup>-01</sup> | 1.03 (0.99 - 1.07) |
| rs127382   | 1   | 88561536      | intergenic              | T/C                 | 0.2511         | 4.21*10 <sup>-04</sup> | 1.17 (1.07 - 1.28) | 8.93*10 <sup>-02</sup> | 1.04 (0.99 - 1.08) |
| rs127384   | 1   | 88563548      | intergenic              | T/C                 | 0.3199         | 1.43*10 <sup>-04</sup> | 1.17 (1.07 - 1.27) | 5.25*10 <sup>-01</sup> | 1.01 (0.97 - 1.06) |
| rs480054   | 1   | 88564020      | intergenic              | G/A                 | 0.3003         | 1.97*10 <sup>-04</sup> | 1.17 (1.07 - 1.28) | 5.90*10 <sup>-04</sup> | 1.11 (1.05 - 1.18) |
| rs766353   | 1   | 88594104      | intergenic              | A/G                 | 0.3306         | 2.18*10 <sup>-04</sup> | 1.16 (1.07 - 1.27) | 5.34*10 <sup>-01</sup> | 1.01 (0.97 - 1.05) |
| rs6682490  | 1   | 88597878      | intergenic              | A/T                 | 0.1630         | 6.25*10 <sup>-04</sup> | 1.21 (1.09 - 1.35) | 7.20*10 <sup>-05</sup> | 1.17 (1.08 - 1.26) |
| rs10494161 | 1   | 113720977     | intergenic              | C/G                 | 0.9292         | 4.07*10 <sup>-04</sup> | 1.34 (1.14 - 1.57) | 3.76*10 <sup>-01</sup> | 1.03 (0.96 - 1.11) |
| rs4839321  | 1   | 113848987     | MAGI3                   | A/G                 | 0.9274         | 9.07*10 <sup>-04</sup> | 1.31 (1.11 - 1.53) | 4.61*10 <sup>-01</sup> | 1.03 (0.95 - 1.12) |
| rs9661113  | 1   | 118600962     | intergenic              | T/C                 | 0.5177         | 2.94*10 <sup>-04</sup> | 1.15 (1.06 - 1.24) | 8.79*10 <sup>-03</sup> | 1.05 (1.01 - 1.09) |
| rs7551954  | 1   | 118601450     | intergenic              | C/T                 | 0.5179         | 3.21*10 <sup>-04</sup> | 1.15 (1.06 - 1.24) | 3.40*10 <sup>-03</sup> | 1.06 (1.02 - 1.10) |
| rs10802017 | 1   | 118612357     | AL391557.11,<br>5S_rRNA | C/T                 | 0.5149         | 2.41*10 <sup>-04</sup> | 1.15 (1.06 - 1.25) | 3.58*10 <sup>-03</sup> | 1.06 (1.02 - 1.09) |
| rs7515420  | 1   | 118624670     | intergenic              | A/G                 | 0.5189         | 3.25*10 <sup>-04</sup> | 1.15 (1.06 - 1.24) | 3.84*10 <sup>-03</sup> | 1.06 (1.02 - 1.09) |
| rs1938283  | 1   | 118633460     | intergenic              | A/C                 | 0.5163         | 3.31*10 <sup>-04</sup> | 1.15 (1.06 - 1.24) | 5.84*10 <sup>-03</sup> | 1.05 (1.01 - 1.09) |
| rs942835   | 1   | 120064541     | PHGDH                   | T/C                 | 0.8657         | 4.50*10 <sup>-04</sup> | 1.24 (1.10 - 1.40) | 6.98*10 <sup>-02</sup> | 1.05 (1.00 - 1.11) |
| rs894079   | 1   | 120065180     | PHGDH                   | A/G                 | 0.8680         | 7.55*10 <sup>-05</sup> | 1.29 (1.14 - 1.45) | 8.75*10 <sup>-02</sup> | 1.05 (0.99 - 1.10) |
| rs6658925  | 1   | 150749425     | CRCT1, LCE5A            | A/G                 | 0.3667         | 3.59*10 <sup>-04</sup> | 1.16 (1.07 - 1.27) | 4.19*10 <sup>-02</sup> | 1.04 (1.00 - 1.09) |
| rs548252   | 1   | 150756366     | CRCT1                   | C/T                 | 0.3666         | 7.96*10 <sup>-04</sup> | 1.15 (1.06 - 1.25) | 9.66*10 <sup>-02</sup> | 1.03 (0.99 - 1.07) |
| rs4845443  | 1   | 150773780     | intergenic              | G/A                 | 0.3659         | 9.82*10 <sup>-04</sup> | 1.15 (1.06 - 1.25) | 1.16*10 <sup>-01</sup> | 1.04 (0.99 - 1.08) |
| rs16838818 | 1   | 155801783     | intergenic              | A/C                 | 0.0706         | 9.31*10 <sup>-04</sup> | 1.30 (1.11 - 1.51) | 4.07*10 <sup>-03</sup> | 1.18 (1.05 - 1.32) |
| rs16832790 | 1   | 159542567     | MPZ                     | T/C                 | 0.0243         | 2.13*10 <sup>-04</sup> | 1.47 (1.14 - 1.89) | 7.68*10 <sup>-01</sup> | 1.02 (0.89 - 1.17) |
| rs16832872 | 1   | 159602526     | SDHC, C1orf192          | A/G                 | 0.0240         | 9.20*10 <sup>-04</sup> | 1.38 (1.07 - 1.78) | 8.95*10 <sup>-01</sup> | 1.01 (0.89 - 1.15) |
| rs723821   | 1   | 163283336     | intergenic              | C/A                 | 0.8972         | 7.80*10 <sup>-04</sup> | 1.26 (1.10 - 1.44) | 2.19*10 <sup>-01</sup> | 1.04 (0.98 - 1.11) |
| rs723822   | 1   | 163283356     | intergenic              | A/T                 | 0.8867         | 7.44*10 <sup>-04</sup> | 1.23 (1.08 - 1.4)  | 4.64*10 <sup>-01</sup> | 1.03 (0.95 - 1.13) |
| rs12122751 | 1   | 169660773     | intergenic              | A/G                 | 0.7624         | 3.54*10 <sup>-04</sup> | 1.18 (1.08 - 1.30) | 2.12*10 <sup>-04</sup> | 1.09 (1.04 - 1.14) |
| rs873525   | 1   | 173685824     | TNR                     | A/G                 | 0.0390         | 7.35*10 <sup>-04</sup> | 1.42 (1.16 - 1.73) | 1.58*10 <sup>-01</sup> | 1.07 (0.97 - 1.18) |
| rs12043681 | 1   | 197042097     | intergenic              | T/C                 | 0.6092         | 6.17*10 <sup>-04</sup> | 1.16 (1.06 - 1.26) | 1.90*10 <sup>-01</sup> | 1.03 (0.99 - 1.07) |
| rs9427431  | 1   | 197044095     | intergenic              | T/C                 | 0.6075         | 5.52*10 <sup>-04</sup> | 1.16 (1.07 - 1.26) | 4.76*10 <sup>-02</sup> | 1.04 (1.00 - 1.08) |
| rs1407684  | 1   | 197044377     | intergenic              | T/C                 | 0.6094         | 5.35*10 <sup>-04</sup> | 1.16 (1.07 - 1.26) | 5.05*10 <sup>-02</sup> | 1.04 (1.00 - 1.08) |

| SNP        | Chr | Position (bp) | Gene                 | Risk/NonRisk Allele | Risk frequency | GWA                    |                    | Pooled analysis        |                    |
|------------|-----|---------------|----------------------|---------------------|----------------|------------------------|--------------------|------------------------|--------------------|
|            |     |               |                      |                     |                | P Value                | OR (95% CI)        | P Value                | OR (95% CI)        |
| rs10494874 | 1   | 204021311     | SLC41A1              | G/C                 | 0.7403         | 3.03*10 <sup>-04</sup> | 1.18 (1.08 - 1.30) | 1.58*10 <sup>-02</sup> | 1.08 (1.01 - 1.15) |
| rs6679073  | 1   | 204023107     | SLC41A1              | C/A                 | 0.7394         | 1.13*10 <sup>-04</sup> | 1.20 (1.09 - 1.32) | 9.45*10 <sup>-02</sup> | 1.04 (0.99 - 1.08) |
| rs4347270  | 1   | 215955595     | SPATA17              | G/A                 | 0.0624         | 4.40*10 <sup>-05</sup> | 1.40 (1.19 - 1.64) | 4.88*10 <sup>-02</sup> | 1.08 (1.00 - 1.16) |
| rs10429870 | 1   | 222907422     | CNIH3                | C/T                 | 0.8822         | 4.83*10 <sup>-04</sup> | 1.25 (1.10 - 1.42) | 1.74*10 <sup>-03</sup> | 1.09 (1.03 - 1.16) |
| rs12025142 | 1   | 222942724     | CNIH3                | C/A                 | 0.8814         | 8.45*10 <sup>-04</sup> | 1.24 (1.09 - 1.40) | 1.35*10 <sup>-03</sup> | 1.10 (1.04 - 1.16) |
| rs12410483 | 1   | 228212800     | intergenic           | A/G                 | 0.9030         | 5.37*10 <sup>-04</sup> | 1.28 (1.11 - 1.47) | 7.46*10 <sup>-01</sup> | 1.01 (0.95 - 1.08) |
| rs4411137  | 1   | 228213090     | intergenic           | C/A                 | 0.8761         | 2.81*10 <sup>-04</sup> | 1.26 (1.11 - 1.42) | 1.14*10 <sup>-01</sup> | 1.05 (0.99 - 1.12) |
| rs16857696 | 1   | 230771342     | intergenic           | G/T                 | 0.0234         | 2.83*10 <sup>-04</sup> | 1.60 (1.24 - 2.07) | 2.62*10 <sup>-01</sup> | 1.08 (0.95 - 1.23) |
| rs12474647 | 2   | 9471731       | ITGB1BP1             | T/A                 | 0.3909         | 2.49*10 <sup>-04</sup> | 1.16 (1.07 - 1.26) | 1.17*10 <sup>-03</sup> | 1.07 (1.03 - 1.11) |
| rs4669402  | 2   | 9696864       | intergenic           | G/C                 | 0.9381         | 5.45*10 <sup>-04</sup> | 1.35 (1.14 - 1.61) | 1.78*10 <sup>-04</sup> | 1.16 (1.07 - 1.25) |
| rs6721977  | 2   | 11740888      | intergenic           | C/A                 | 0.0255         | 1.41*10 <sup>-04</sup> | 1.62 (1.26 - 2.09) | 8.69*10 <sup>-02</sup> | 1.11 (0.98 - 1.25) |
| rs916524   | 2   | 12197847      | intergenic           | T/C                 | 0.2108         | 8.18*10 <sup>-04</sup> | 1.18 (1.07 - 1.30) | 2.69*10 <sup>-02</sup> | 1.05 (1.01 - 1.10) |
| rs6739656  | 2   | 15749709      | intergenic           | C/G                 | 0.0999         | 4.31*10 <sup>-04</sup> | 1.27 (1.11 - 1.45) | 3.08*10 <sup>-01</sup> | 1.04 (0.97 - 1.11) |
| rs6754458  | 2   | 15751503      | intergenic           | G/A                 | 0.1007         | 4.72*10 <sup>-04</sup> | 1.26 (1.11 - 1.44) | 2.52*10 <sup>-01</sup> | 1.04 (0.97 - 1.11) |
| rs16985872 | 2   | 19120878      | intergenic           | C/T                 | 0.0288         | 7.12*10 <sup>-04</sup> | 1.50 (1.18 - 1.89) | 4.27*10 <sup>-03</sup> | 1.19 (1.06 - 1.34) |
| rs11124408 | 2   | 35051809      | intergenic           | T/C                 | 0.1173         | 5.40*10 <sup>-04</sup> | 1.25 (1.10 - 1.41) | 1.30*10 <sup>-02</sup> | 1.08 (1.02 - 1.15) |
| rs1579491  | 2   | 37872165      | intergenic           | G/A                 | 0.9426         | 6.77*10 <sup>-04</sup> | 1.36 (1.14 - 1.62) | 9.71*10 <sup>-01</sup> | 1.00 (0.92 - 1.09) |
| rs17021567 | 2   | 37961598      | intergenic           | C/A                 | 0.1129         | 5.63*10 <sup>-04</sup> | 1.25 (1.10 - 1.41) | 4.09*10 <sup>-02</sup> | 1.08 (1.00 - 1.16) |
| rs17022010 | 2   | 38185435      | intergenic           | T/A                 | 0.0835         | 5.30*10 <sup>-04</sup> | 1.29 (1.12 - 1.48) | 1.50*10 <sup>-02</sup> | 1.09 (1.02 - 1.17) |
| rs232535   | 2   | 38185807      | intergenic           | C/T                 | 0.6785         | 1.61*10 <sup>-04</sup> | 1.18 (1.08 - 1.28) | 6.78*10 <sup>-01</sup> | 1.01 (0.97 - 1.05) |
| rs2432662  | 2   | 38205678      | intergenic           | C/T                 | 0.8193         | 8.57*10 <sup>-04</sup> | 1.20 (1.08 - 1.33) | 3.05*10 <sup>-01</sup> | 1.03 (0.97 - 1.09) |
| rs232620   | 2   | 38212168      | intergenic           | A/G                 | 0.6494         | 4.03*10 <sup>-04</sup> | 1.16 (1.07 - 1.26) | 8.27*10 <sup>-01</sup> | 1.00 (0.97 - 1.04) |
| rs170818   | 2   | 38228071      | U6                   | C/T                 | 0.8046         | 2.50*10 <sup>-04</sup> | 1.21 (1.09 - 1.34) | 5.46*10 <sup>-01</sup> | 1.01 (0.97 - 1.06) |
| rs232576   | 2   | 38239724      | intergenic           | A/G                 | 0.6577         | 4.18*10 <sup>-06</sup> | 1.22 (1.12 - 1.33) | 2.34*10 <sup>-03</sup> | 1.07 (1.02 - 1.12) |
| rs232569   | 2   | 38247867      | intergenic           | C/T                 | 0.6605         | 4.89*10 <sup>-05</sup> | 1.19 (1.09 - 1.3)  | 4.48*10 <sup>-02</sup> | 1.04 (1.00 - 1.08) |
| rs2447738  | 2   | 38264671      | intergenic           | C/T                 | 0.7147         | 3.66*10 <sup>-05</sup> | 1.21 (1.1 - 1.32)  | 1.30*10 <sup>-02</sup> | 1.05 (1.01 - 1.10) |
| rs232587   | 2   | 38274357      | intergenic           | T/A                 | 0.6985         | 6.36*10 <sup>-05</sup> | 1.20 (1.09 - 1.31) | 2.19*10 <sup>-02</sup> | 1.05 (1.01 - 1.09) |
| rs1965752  | 2   | 38797113      | GALM                 | G/A                 | 0.0229         | 3.33*10 <sup>-04</sup> | 1.61 (1.24 - 2.08) | 2.78*10 <sup>-01</sup> | 1.06 (0.95 - 1.19) |
| rs17030342 | 2   | 43152887      | intergenic           | A/G                 | 0.1046         | 4.23*10 <sup>-04</sup> | 1.26 (1.10 - 1.43) | 5.10*10 <sup>-01</sup> | 1.02 (0.96 - 1.08) |
| rs17326067 | 2   | 48700601      | STON1                | C/T                 | 0.9672         | 4.89*10 <sup>-04</sup> | 1.52 (1.20 - 1.93) | 1.54*10 <sup>-01</sup> | 1.08 (0.97 - 1.2)  |
| rs1589749  | 2   | 48716002      | STON1,<br>AC073082.3 | G/A                 | 0.2127         | 7.03*10 <sup>-04</sup> | 1.18 (1.07 - 1.30) | 4.72*10 <sup>-02</sup> | 1.05 (1.00 - 1.09) |
| rs2349099  | 2   | 48716406      | STON1,<br>AC073082.3 | T/C                 | 0.2072         | 9.88*10 <sup>-04</sup> | 1.18 (1.07 - 1.30) | 5.76*10 <sup>-02</sup> | 1.04 (1.00 - 1.09) |
| rs6738590  | 2   | 64913107      | Y_RNA                | A/G                 | 0.2196         | 1.40*10 <sup>-04</sup> | 1.18 (1.07 - 1.30) | 5.89*10 <sup>-04</sup> | 1.09 (1.04 - 1.14) |

| SNP        | Chr | Position (bp) | Gene          | Risk/NonRisk Allele | Risk frequency | GWA                    |                    | Pooled analysis        |                    |
|------------|-----|---------------|---------------|---------------------|----------------|------------------------|--------------------|------------------------|--------------------|
|            |     |               |               |                     |                | P Value                | OR (95% CI)        | P Value                | OR (95% CI)        |
| rs17033861 | 2   | 67681582      | intergenic    | G/A                 | 0.8168         | 1.53*10 <sup>-04</sup> | 1.22 (1.10 - 1.36) | 3.26*10 <sup>-01</sup> | 1.02 (0.98 - 1.07) |
| rs13398112 | 2   | 67682118      | intergenic    | T/C                 | 0.8141         | 2.09*10 <sup>-04</sup> | 1.22 (1.10 - 1.35) | 2.73*10 <sup>-01</sup> | 1.03 (0.98 - 1.07) |
| rs10210930 | 2   | 70283309      | intergenic    | T/C                 | 0.0652         | 4.47*10 <sup>-04</sup> | 1.30 (1.11 - 1.53) | 8.86*10 <sup>-01</sup> | 1.01 (0.93 - 1.09) |
| rs6751173  | 2   | 70359412      | PCYOX1, SNRPG | A/G                 | 0.0652         | 3.53*10 <sup>-04</sup> | 1.31 (1.12 - 1.54) | 8.35*10 <sup>-01</sup> | 1.01 (0.93 - 1.09) |
| rs13399467 | 2   | 70399046      | intergenic    | G/C                 | 0.1006         | 4.57*10 <sup>-04</sup> | 1.25 (1.1 - 1.43)  | 1.58*10 <sup>-01</sup> | 1.05 (0.98 - 1.13) |
| rs10221875 | 2   | 88481280      | intergenic    | A/G                 | 0.9272         | 5.54*10 <sup>-04</sup> | 1.33 (1.13 - 1.56) | 4.43*10 <sup>-02</sup> | 1.09 (1.00 - 1.18) |
| rs1530128  | 2   | 104530881     | intergenic    | A/G                 | 0.5036         | 2.78*10 <sup>-04</sup> | 1.16 (1.07 - 1.25) | 1.75*10 <sup>-02</sup> | 1.05 (1.01 - 1.09) |
| rs13005764 | 2   | 104550787     | AC013402.9    | A/G                 | 0.8984         | 2.15*10 <sup>-04</sup> | 1.29 (1.13 - 1.48) | 3.79*10 <sup>-01</sup> | 1.03 (0.97 - 1.09) |
| rs4849561  | 2   | 117990472     | intergenic    | C/T                 | 0.8517         | 4.35*10 <sup>-04</sup> | 1.22 (1.09 - 1.37) | 8.27*10 <sup>-05</sup> | 1.13 (1.06 - 1.20) |
| rs6753213  | 2   | 118208283     | intergenic    | A/G                 | 0.8945         | 2.05*10 <sup>-04</sup> | 1.29 (1.12 - 1.47) | 1.40*10 <sup>-03</sup> | 1.10 (1.04 - 1.17) |
| rs10170205 | 2   | 125272583     | CNTNAP5       | C/T                 | 0.0376         | 8.73*10 <sup>-04</sup> | 1.41 (1.15 - 1.73) | 8.23*10 <sup>-04</sup> | 1.28 (1.11 - 1.48) |
| rs7575461  | 2   | 130250800     | intergenic    | G/A                 | 0.3781         | 6.05*10 <sup>-04</sup> | 1.15 (1.06 - 1.25) | 5.03*10 <sup>-01</sup> | 1.01 (0.97 - 1.06) |
| rs9646794  | 2   | 152418677     | CACNB4        | A/T                 | 0.0843         | 9.49*10 <sup>-04</sup> | 1.27 (1.1 - 1.47)  | 7.29*10 <sup>-01</sup> | 1.01 (0.94 - 1.09) |
| rs2007857  | 2   | 153696168     | intergenic    | A/G                 | 0.7704         | 5.38*10 <sup>-04</sup> | 1.18 (1.08 - 1.3)  | 3.13*10 <sup>-03</sup> | 1.11 (1.03 - 1.18) |
| rs13025412 | 2   | 153697833     | intergenic    | C/T                 | 0.7892         | 9.53*10 <sup>-04</sup> | 1.18 (1.07 - 1.3)  | 3.41*10 <sup>-02</sup> | 1.05 (1.00 - 1.10) |
| rs1806328  | 2   | 169215125     | LASS6         | G/A                 | 0.4728         | 5.47*10 <sup>-04</sup> | 1.15 (1.06 - 1.25) | 1.74*10 <sup>-03</sup> | 1.07 (1.03 - 1.12) |
| rs2193193  | 2   | 169784327     | LRP2          | A/G                 | 0.4878         | 8.71*10 <sup>-05</sup> | 1.17 (1.08 - 1.27) | 3.11*10 <sup>-02</sup> | 1.04 (1.00 - 1.08) |
| rs2268370  | 2   | 169785809     | LRP2          | C/A                 | 0.4237         | 3.20*10 <sup>-04</sup> | 1.16 (1.07 - 1.26) | 3.52*10 <sup>-02</sup> | 1.04 (1.00 - 1.08) |
| rs2239594  | 2   | 169798577     | LRP2          | T/C                 | 0.4727         | 3.18*10 <sup>-05</sup> | 1.19 (1.09 - 1.28) | 2.79*10 <sup>-03</sup> | 1.06 (1.02 - 1.10) |
| rs830957   | 2   | 169820344     | LRP2          | T/C                 | 0.4592         | 6.35*10 <sup>-05</sup> | 1.18 (1.09 - 1.28) | 2.37*10 <sup>-03</sup> | 1.06 (1.02 - 1.10) |
| rs830959   | 2   | 169821344     | LRP2          | T/C                 | 0.4655         | 7.76*10 <sup>-05</sup> | 1.17 (1.08 - 1.27) | 3.40*10 <sup>-03</sup> | 1.06 (1.02 - 1.10) |
| rs830960   | 2   | 169821642     | LRP2          | T/C                 | 0.4659         | 8.28*10 <sup>-05</sup> | 1.17 (1.08 - 1.27) | 4.38*10 <sup>-03</sup> | 1.06 (1.02 - 1.10) |
| rs831002   | 2   | 169841998     | LRP2          | T/C                 | 0.2104         | 3.01*10 <sup>-04</sup> | 1.2 (1.08 - 1.32)  | 4.06*10 <sup>-02</sup> | 1.05 (1.00 - 1.10) |
| rs831004   | 2   | 169843988     | LRP2          | C/T                 | 0.4076         | 3.21*10 <sup>-06</sup> | 1.21 (1.12 - 1.32) | 2.41*10 <sup>-02</sup> | 1.05 (1.01 - 1.09) |
| rs831007   | 2   | 169846752     | LRP2          | T/C                 | 0.2394         | 4.58*10 <sup>-05</sup> | 1.21 (1.11 - 1.33) | 1.44*10 <sup>-02</sup> | 1.07 (1.01 - 1.12) |
| rs831008   | 2   | 169847142     | LRP2          | C/T                 | 0.1618         | 3.56*10 <sup>-04</sup> | 1.22 (1.09 - 1.36) | 6.72*10 <sup>-02</sup> | 1.06 (1.00 - 1.12) |
| rs6721083  | 2   | 170789898     | MYO3B         | G/C                 | 0.0637         | 7.43*10 <sup>-04</sup> | 1.32 (1.12 - 1.54) | 5.47*10 <sup>-01</sup> | 1.03 (0.94 - 1.12) |
| rs1816811  | 2   | 173871566     | intergenic    | G/C                 | 0.7535         | 6.18*10 <sup>-04</sup> | 1.18 (1.07 - 1.29) | 2.74*10 <sup>-04</sup> | 1.08 (1.04 - 1.13) |
| rs6712331  | 2   | 173873289     | intergenic    | A/C                 | 0.7529         | 5.54*10 <sup>-04</sup> | 1.18 (1.07 - 1.29) | 6.15*10 <sup>-04</sup> | 1.08 (1.03 - 1.13) |
| rs2303536  | 2   | 179066911     | PLEKHA3       | G/A                 | 0.1441         | 3.72*10 <sup>-04</sup> | 1.23 (1.1 - 1.37)  | 2.93*10 <sup>-02</sup> | 1.07 (1.01 - 1.13) |
| rs1377767  | 2   | 184294872     | intergenic    | G/A                 | 0.6738         | 7.08*10 <sup>-04</sup> | 1.16 (1.07 - 1.27) | 3.57*10 <sup>-01</sup> | 1.02 (0.98 - 1.07) |
| rs6712217  | 2   | 188209175     | intergenic    | G/A                 | 0.1748         | 2.29*10 <sup>-04</sup> | 1.22 (1.1 - 1.35)  | 2.29*10 <sup>-01</sup> | 1.03 (0.98 - 1.08) |
| rs13034939 | 2   | 188219341     | intergenic    | A/G                 | 0.1779         | 3.01*10 <sup>-04</sup> | 1.21 (1.09 - 1.34) | 1.56*10 <sup>-01</sup> | 1.04 (0.99 - 1.09) |
| rs6728009  | 2   | 188408860     | intergenic    | G/T                 | 0.0120         | 2.64*10 <sup>-05</sup> | 2.14 (1.49 - 3.08) | 9.39*10 <sup>-01</sup> | 1.01 (0.87 - 1.17) |
| rs6727168  | 2   | 207697715     | KLF7          | T/C                 | 0.6777         | 4.73*10 <sup>-04</sup> | 1.17 (1.07 - 1.27) | 2.28*10 <sup>-01</sup> | 1.03 (0.98 - 1.07) |

| SNP        | Chr | Position (bp) | Gene                | Risk/NonRisk Allele | Risk frequency | GWA                    |                    | Pooled analysis        |                    |
|------------|-----|---------------|---------------------|---------------------|----------------|------------------------|--------------------|------------------------|--------------------|
|            |     |               |                     |                     |                | P Value                | OR (95% CI)        | P Value                | OR (95% CI)        |
| rs7582312  | 2   | 207813763     | intergenic          | T/C                 | 0.0856         | 3.45*10 <sup>-04</sup> | 1.3 (1.12 - 1.49)  | 3.02*10 <sup>-02</sup> | 1.08 (1.01 - 1.16) |
| rs11676172 | 2   | 218355367     | intergenic          | C/T                 | 0.0488         | 1.18*10 <sup>-04</sup> | 1.42 (1.18 - 1.7)  | 3.42*10 <sup>-02</sup> | 1.11 (1.01 - 1.23) |
| rs7581631  | 2   | 228167188     | intergenic          | T/A                 | 0.0425         | 5.15*10 <sup>-04</sup> | 1.41 (1.16 - 1.71) | 4.13*10 <sup>-02</sup> | 1.10 (1.00 - 1.21) |
| rs6728087  | 2   | 229919505     | intergenic          | A/C                 | 0.5615         | 4.29*10 <sup>-04</sup> | 1.15 (1.06 - 1.25) | 9.63*10 <sup>-01</sup> | 1.00 (0.96 - 1.04) |
| rs7584396  | 2   | 235048006     | intergenic          | C/T                 | 0.0689         | 2.38*10 <sup>-04</sup> | 1.33 (1.14 - 1.55) | 4.53*10 <sup>-02</sup> | 1.12 (1.00 - 1.25) |
| rs3792085  | 2   | 240597462     | NDUFA10             | G/A                 | 0.2813         | 5.02*10 <sup>-04</sup> | 1.18 (1.07 - 1.29) | 4.72*10 <sup>-01</sup> | 1.02 (0.97 - 1.06) |
| rs3792083  | 2   | 240603577     | NDUFA10             | G/A                 | 0.3101         | 8.65*10 <sup>-04</sup> | 1.16 (1.06 - 1.27) | 4.13*10 <sup>-01</sup> | 1.02 (0.98 - 1.06) |
| rs7630409  | 3   | 76192         | intergenic          | A/T                 | 0.2236         | 4.23*10 <sup>-05</sup> | 1.22 (1.11 - 1.34) | 9.35*10 <sup>-01</sup> | 1.00 (0.96 - 1.05) |
| rs990284   | 3   | 79972         | intergenic          | G/A                 | 0.3706         | 8.20*10 <sup>-04</sup> | 1.15 (1.06 - 1.25) | 1.69*10 <sup>-01</sup> | 1.03 (0.99 - 1.08) |
| rs17047384 | 3   | 102933        | intergenic          | A/C                 | 0.1896         | 8.88*10 <sup>-05</sup> | 1.22 (1.1 - 1.35)  | 8.01*10 <sup>-01</sup> | 1.01 (0.96 - 1.05) |
| rs7629216  | 3   | 127005        | intergenic          | T/G                 | 0.1829         | 2.48*10 <sup>-04</sup> | 1.21 (1.09 - 1.34) | 7.07*10 <sup>-01</sup> | 1.01 (0.96 - 1.07) |
| rs9857814  | 3   | 127047        | intergenic          | G/A                 | 0.1841         | 7.24*10 <sup>-05</sup> | 1.23 (1.11 - 1.36) | 5.83*10 <sup>-01</sup> | 1.01 (0.97 - 1.06) |
| rs6786696  | 3   | 127592        | intergenic          | A/G                 | 0.1602         | 1.52*10 <sup>-04</sup> | 1.23 (1.1 - 1.37)  | 6.47*10 <sup>-01</sup> | 1.01 (0.96 - 1.07) |
| rs4685564  | 3   | 2826955       | CNTN4               | T/G                 | 0.2763         | 6.98*10 <sup>-04</sup> | 1.17 (1.07 - 1.28) | 4.91*10 <sup>-03</sup> | 1.06 (1.02 - 1.10) |
| rs771000   | 3   | 3317533       | intergenic          | A/G                 | 0.4527         | 7.52*10 <sup>-05</sup> | 1.18 (1.09 - 1.28) | 1.50*10 <sup>-01</sup> | 1.03 (0.99 - 1.07) |
| rs2730313  | 3   | 5879553       | intergenic          | G/T                 | 0.0804         | 2.64*10 <sup>-04</sup> | 1.3 (1.13 - 1.5)   | 5.43*10 <sup>-01</sup> | 1.02 (0.96 - 1.09) |
| rs1568170  | 3   | 5940594       | intergenic          | G/C                 | 0.0700         | 1.00*10 <sup>-04</sup> | 1.36 (1.16 - 1.58) | 1.32*10 <sup>-01</sup> | 1.06 (0.98 - 1.15) |
| rs157462   | 3   | 6339784       | intergenic          | G/C                 | 0.1202         | 4.65*10 <sup>-05</sup> | 1.24 (1.1 - 1.41)  | 2.44*10 <sup>-01</sup> | 1.03 (0.98 - 1.09) |
| rs164336   | 3   | 6737242       | intergenic          | C/T                 | 0.8467         | 9.40*10 <sup>-04</sup> | 1.21 (1.08 - 1.35) | 2.15*10 <sup>-01</sup> | 1.04 (0.98 - 1.10) |
| rs345244   | 3   | 6742906       | intergenic          | C/G                 | 0.8450         | 4.09*10 <sup>-04</sup> | 1.22 (1.09 - 1.37) | 1.05*10 <sup>-02</sup> | 1.11 (1.02 - 1.20) |
| rs17288435 | 3   | 6838813       | intergenic          | C/A                 | 0.1398         | 8.13*10 <sup>-05</sup> | 1.26 (1.12 - 1.41) | 3.77*10 <sup>-03</sup> | 1.09 (1.03 - 1.16) |
| rs7611030  | 3   | 8486921       | intergenic          | A/G                 | 0.5089         | 9.00*10 <sup>-04</sup> | 1.14 (1.06 - 1.24) | 4.93*10 <sup>-04</sup> | 1.07 (1.03 - 1.12) |
| rs11720160 | 3   | 8492932       | intergenic          | T/A                 | 0.5259         | 4.27*10 <sup>-04</sup> | 1.15 (1.06 - 1.25) | 2.41*10 <sup>-03</sup> | 1.06 (1.02 - 1.11) |
| rs345069   | 3   | 8831126       | intergenic          | C/T                 | 0.9715         | 4.96*10 <sup>-04</sup> | 1.57 (1.22 - 2.03) | 3.91*10 <sup>-02</sup> | 1.12 (1.01 - 1.25) |
| rs666743   | 3   | 9016346       | SRGAP3              | T/C                 | 0.2084         | 8.20*10 <sup>-04</sup> | 1.18 (1.07 - 1.3)  | 3.53*10 <sup>-02</sup> | 1.06 (1.00 - 1.11) |
| rs1161765  | 3   | 9023152       | SRGAP3              | A/G                 | 0.2037         | 7.31*10 <sup>-04</sup> | 1.19 (1.08 - 1.31) | 1.19*10 <sup>-01</sup> | 1.04 (0.99 - 1.10) |
| rs341788   | 3   | 9025659       | SRGAP3              | C/T                 | 0.2052         | 9.31*10 <sup>-04</sup> | 1.18 (1.07 - 1.3)  | 2.89*10 <sup>-02</sup> | 1.06 (1.01 - 1.12) |
| rs1719571  | 3   | 10344180      | ATP2B2              | A/G                 | 0.8562         | 5.05*10 <sup>-04</sup> | 1.21 (1.08 - 1.36) | 4.51*10 <sup>-01</sup> | 1.02 (0.97 - 1.08) |
| rs1710887  | 3   | 11014960      | SLC6A1              | G/T                 | 0.6100         | 6.70*10 <sup>-04</sup> | 1.15 (1.06 - 1.25) | 4.70*10 <sup>-01</sup> | 1.02 (0.97 - 1.06) |
| rs2731334  | 3   | 14082388      | TPRXL               | C/T                 | 0.8633         | 9.70*10 <sup>-04</sup> | 1.22 (1.08 - 1.37) | 2.87*10 <sup>-02</sup> | 1.08 (1.01 - 1.15) |
| rs2929343  | 3   | 19956418      | EFHB,<br>AC097635.2 | A/T                 | 0.2458         | 7.52*10 <sup>-04</sup> | 1.17 (1.07 - 1.28) | 4.50*10 <sup>-01</sup> | 1.02 (0.97 - 1.07) |
| rs2364515  | 3   | 19956559      | EFHB,<br>AC097635.2 | G/C                 | 0.2451         | 6.38*10 <sup>-04</sup> | 1.17 (1.07 - 1.29) | 4.78*10 <sup>-01</sup> | 1.02 (0.97 - 1.07) |
| rs2577120  | 3   | 29773438      | RBMS3               | C/G                 | 0.9113         | 5.87*10 <sup>-04</sup> | 1.29 (1.11 - 1.49) | 9.16*10 <sup>-02</sup> | 1.07 (0.99 - 1.15) |

| SNP        | Chr | Position (bp) | Gene       | Risk/NonRisk Allele | Risk frequency | GWA                    |                    | Pooled analysis        |                    |
|------------|-----|---------------|------------|---------------------|----------------|------------------------|--------------------|------------------------|--------------------|
|            |     |               |            |                     |                | P Value                | OR (95% CI)        | P Value                | OR (95% CI)        |
| rs11714423 | 3   | 31768861      | OSBPL10    | A/G                 | 0.5787         | 2.56*10 <sup>-05</sup> | 1.19 (1.09 - 1.29) | 1.03*10 <sup>-01</sup> | 1.03 (0.99 - 1.07) |
| rs11710822 | 3   | 31768875      | OSBPL10    | T/C                 | 0.5721         | 6.26*10 <sup>-05</sup> | 1.18 (1.09 - 1.27) | 4.65*10 <sup>-01</sup> | 1.01 (0.98 - 1.05) |
| rs936160   | 3   | 31787589      | OSBPL10    | C/T                 | 0.2618         | 2.16*10 <sup>-04</sup> | 1.18 (1.08 - 1.3)  | 4.90*10 <sup>-01</sup> | 1.01 (0.97 - 1.06) |
| rs2219250  | 3   | 31792548      | OSBPL10    | T/C                 | 0.2341         | 4.65*10 <sup>-04</sup> | 1.18 (1.07 - 1.3)  | 3.18*10 <sup>-01</sup> | 1.02 (0.98 - 1.07) |
| rs2068100  | 3   | 31812208      | OSBPL10    | A/T                 | 0.2794         | 4.65*10 <sup>-04</sup> | 1.17 (1.07 - 1.28) | 5.63*10 <sup>-01</sup> | 1.01 (0.97 - 1.05) |
| rs7628972  | 3   | 31814101      | OSBPL10    | C/T                 | 0.2781         | 3.70*10 <sup>-04</sup> | 1.17 (1.07 - 1.28) | 4.75*10 <sup>-01</sup> | 1.01 (0.97 - 1.06) |
| rs7643025  | 3   | 31814246      | OSBPL10    | T/C                 | 0.2629         | 5.32*10 <sup>-04</sup> | 1.17 (1.07 - 1.28) | 2.29*10 <sup>-01</sup> | 1.03 (0.98 - 1.07) |
| rs6550070  | 3   | 31817639      | OSBPL10    | C/A                 | 0.2738         | 8.84*10 <sup>-04</sup> | 1.16 (1.06 - 1.27) | 4.61*10 <sup>-01</sup> | 1.02 (0.97 - 1.06) |
| rs6808708  | 3   | 31822981      | OSBPL10    | T/A                 | 0.2433         | 7.71*10 <sup>-05</sup> | 1.2 (1.1 - 1.32)   | 2.16*10 <sup>-01</sup> | 1.03 (0.98 - 1.07) |
| rs11915888 | 3   | 41428940      | ULK4       | G/A                 | 0.2965         | 9.50*10 <sup>-04</sup> | 1.16 (1.06 - 1.26) | 3.66*10 <sup>-02</sup> | 1.05 (1.00 - 1.10) |
| rs9872216  | 3   | 41433642      | ULK4       | C/T                 | 0.3362         | 4.39*10 <sup>-04</sup> | 1.16 (1.07 - 1.26) | 3.23*10 <sup>-02</sup> | 1.04 (1.00 - 1.09) |
| rs1504915  | 3   | 59541524      | intergenic | G/A                 | 0.1344         | 6.56*10 <sup>-04</sup> | 1.22 (1.08 - 1.37) | 6.96*10 <sup>-02</sup> | 1.06 (1.00 - 1.12) |
| rs11130879 | 3   | 62132537      | PTPRG      | A/G                 | 0.7745         | 5.93*10 <sup>-04</sup> | 1.19 (1.08 - 1.31) | 1.58*10 <sup>-02</sup> | 1.06 (1.01 - 1.11) |
| rs1508401  | 3   | 62133412      | PTPRG      | T/C                 | 0.7743         | 6.12*10 <sup>-04</sup> | 1.18 (1.08 - 1.3)  | 2.25*10 <sup>-02</sup> | 1.05 (1.01 - 1.10) |
| rs17066234 | 3   | 62134785      | PTPRG      | C/T                 | 0.9111         | 2.89*10 <sup>-04</sup> | 1.3 (1.13 - 1.5)   | 1.32*10 <sup>-02</sup> | 1.09 (1.02 - 1.17) |
| rs6765895  | 3   | 63439410      | SYNPR      | G/A                 | 0.5610         | 9.01*10 <sup>-04</sup> | 1.14 (1.06 - 1.24) | 4.21*10 <sup>-01</sup> | 1.02 (0.97 - 1.08) |
| rs6772726  | 3   | 63441422      | SYNPR      | G/T                 | 0.5627         | 4.85*10 <sup>-04</sup> | 1.15 (1.06 - 1.25) | 7.19*10 <sup>-01</sup> | 1.01 (0.97 - 1.04) |
| rs13082646 | 3   | 65707153      | AC121493.1 | T/C                 | 0.4947         | 2.01*10 <sup>-05</sup> | 1.19 (1.1 - 1.29)  | 1.18*10 <sup>-01</sup> | 1.03 (0.99 - 1.08) |
| rs814756   | 3   | 65728454      | AC121493.1 | T/C                 | 0.2091         | 9.37*10 <sup>-04</sup> | 1.18 (1.07 - 1.3)  | 5.78*10 <sup>-01</sup> | 1.01 (0.97 - 1.06) |
| rs984038   | 3   | 65737292      | AC121493.1 | C/T                 | 0.4010         | 4.95*10 <sup>-04</sup> | 1.16 (1.07 - 1.25) | 3.71*10 <sup>-03</sup> | 1.06 (1.02 - 1.11) |
| rs1495453  | 3   | 65737587      | AC121493.1 | G/A                 | 0.4763         | 1.15*10 <sup>-05</sup> | 1.2 (1.1 - 1.29)   | 4.82*10 <sup>-03</sup> | 1.06 (1.02 - 1.10) |
| rs3853157  | 3   | 69209318      | UBA3       | T/C                 | 0.2122         | 6.01*10 <sup>-04</sup> | 1.18 (1.07 - 1.3)  | 1.81*10 <sup>-02</sup> | 1.05 (1.01 - 1.10) |
| rs3772979  | 3   | 69209823      | UBA3       | C/T                 | 0.2133         | 9.38*10 <sup>-04</sup> | 1.17 (1.06 - 1.29) | 1.62*10 <sup>-02</sup> | 1.07 (1.01 - 1.12) |
| rs13089190 | 3   | 73041567      | GLT8D4     | T/C                 | 0.0868         | 6.10*10 <sup>-05</sup> | 1.33 (1.16 - 1.53) | 1.38*10 <sup>-02</sup> | 1.08 (1.02 - 1.16) |
| rs17010249 | 3   | 73041922      | GLT8D4     | A/G                 | 0.1073         | 7.78*10 <sup>-05</sup> | 1.29 (1.14 - 1.47) | 1.81*10 <sup>-01</sup> | 1.04 (0.98 - 1.10) |
| rs17010250 | 3   | 73042162      | GLT8D4     | G/C                 | 0.1068         | 8.90*10 <sup>-05</sup> | 1.29 (1.14 - 1.47) | 1.50*10 <sup>-01</sup> | 1.07 (0.98 - 1.17) |
| rs7649077  | 3   | 73046747      | GLT8D4     | T/C                 | 0.1044         | 2.00*10 <sup>-05</sup> | 1.33 (1.16 - 1.51) | 1.75*10 <sup>-01</sup> | 1.04 (0.98 - 1.11) |
| rs9876619  | 3   | 73054439      | GLT8D4     | T/C                 | 0.1042         | 2.75*10 <sup>-05</sup> | 1.32 (1.16 - 1.5)  | 9.20*10 <sup>-02</sup> | 1.05 (0.99 - 1.12) |
| rs7640661  | 3   | 73056422      | GLT8D4     | A/G                 | 0.1308         | 3.83*10 <sup>-04</sup> | 1.24 (1.1 - 1.4)   | 2.93*10 <sup>-01</sup> | 1.03 (0.98 - 1.09) |
| rs17742733 | 3   | 73087270      | GLT8D4     | A/T                 | 0.0774         | 3.10*10 <sup>-04</sup> | 1.29 (1.11 - 1.49) | 4.78*10 <sup>-02</sup> | 1.07 (1.00 - 1.15) |
| rs17691949 | 3   | 73093053      | GLT8D4     | G/A                 | 0.0773         | 1.77*10 <sup>-04</sup> | 1.3 (1.12 - 1.51)  | 4.51*10 <sup>-02</sup> | 1.08 (1.00 - 1.15) |
| rs13320194 | 3   | 81802766      | GBE1       | A/G                 | 0.0142         | 8.63*10 <sup>-05</sup> | 1.87 (1.34 - 2.61) | 1.50*10 <sup>-01</sup> | 1.11 (0.96 - 1.28) |
| rs9289587  | 3   | 99591060      | OR5K3      | A/G                 | 0.8035         | 4.93*10 <sup>-04</sup> | 1.19 (1.07 - 1.32) | 2.46*10 <sup>-01</sup> | 1.03 (0.98 - 1.07) |
| rs709465   | 3   | 109191567     | intergenic | T/G                 | 0.4600         | 7.77*10 <sup>-04</sup> | 1.15 (1.06 - 1.24) | 9.45*10 <sup>-01</sup> | 1.00 (0.97 - 1.04) |
| rs7638293  | 3   | 109192547     | intergenic | A/T                 | 0.3073         | 1.65*10 <sup>-04</sup> | 1.18 (1.08 - 1.29) | 6.65*10 <sup>-01</sup> | 1.01 (0.97 - 1.05) |

| SNP        | Chr | Position (bp) | Gene              | Risk/NonRisk Allele | Risk frequency | GWA                    |                    | Pooled analysis        |                    |
|------------|-----|---------------|-------------------|---------------------|----------------|------------------------|--------------------|------------------------|--------------------|
|            |     |               |                   |                     |                | P Value                | OR (95% CI)        | P Value                | OR (95% CI)        |
| rs877859   | 3   | 109196765     | intergenic        | G/A                 | 0.3159         | 9.14*10 <sup>-05</sup> | 1.19 (1.09 - 1.29) | 6.40*10 <sup>-01</sup> | 1.01 (0.97 - 1.05) |
| rs722927   | 3   | 115163865     | KIAA1407, ZDHHC23 | G/C                 | 0.0691         | 2.40*10 <sup>-04</sup> | 1.34 (1.15 - 1.56) | 6.29*10 <sup>-02</sup> | 1.11 (0.99 - 1.23) |
| rs9875005  | 3   | 118102817     | intergenic        | G/A                 | 0.3627         | 8.72*10 <sup>-04</sup> | 1.15 (1.06 - 1.25) | 2.84*10 <sup>-02</sup> | 1.05 (1.00 - 1.09) |
| rs6777242  | 3   | 118113033     | intergenic        | G/A                 | 0.3639         | 6.31*10 <sup>-04</sup> | 1.15 (1.06 - 1.25) | 5.85*10 <sup>-02</sup> | 1.04 (1.00 - 1.09) |
| rs1523517  | 3   | 123209681     | ILDR1             | C/G                 | 0.5881         | 5.53*10 <sup>-04</sup> | 1.13 (1.05 - 1.23) | 8.14*10 <sup>-01</sup> | 1.00 (0.97 - 1.04) |
| rs7624556  | 3   | 148166362     | intergenic        | A/G                 | 0.0641         | 9.19*10 <sup>-04</sup> | 1.31 (1.12 - 1.55) | 2.01*10 <sup>-01</sup> | 1.06 (0.97 - 1.15) |
| rs6440602  | 3   | 150558049     | AC073522.19       | C/G                 | 0.9267         | 4.86*10 <sup>-04</sup> | 1.34 (1.14 - 1.58) | 3.14*10 <sup>-01</sup> | 1.04 (0.97 - 1.12) |
| rs6772563  | 3   | 161933942     | intergenic        | G/A                 | 0.8943         | 1.20*10 <sup>-04</sup> | 1.3 (1.14 - 1.49)  | 1.13*10 <sup>-03</sup> | 1.16 (1.06 - 1.27) |
| rs9849216  | 3   | 161940045     | intergenic        | C/T                 | 0.8931         | 4.10*10 <sup>-04</sup> | 1.27 (1.11 - 1.46) | 3.58*10 <sup>-02</sup> | 1.07 (1.00 - 1.14) |
| rs13072299 | 3   | 163477333     | intergenic        | C/T                 | 0.9278         | 1.84*10 <sup>-04</sup> | 1.33 (1.13 - 1.56) | 2.24*10 <sup>-02</sup> | 1.1 (1.01 - 1.19)  |
| rs1605389  | 3   | 169456755     | intergenic        | T/C                 | 0.3716         | 5.67*10 <sup>-04</sup> | 1.16 (1.07 - 1.26) | 6.26*10 <sup>-02</sup> | 1.04 (1.00 - 1.08) |
| rs4425233  | 3   | 190751492     | intergenic        | C/T                 | 0.8719         | 1.73*10 <sup>-04</sup> | 1.26 (1.12 - 1.43) | 1.06*10 <sup>-01</sup> | 1.05 (0.99 - 1.10) |
| rs1719615  | 3   | 191236401     | LEPREL1           | A/C                 | 0.2114         | 4.50*10 <sup>-04</sup> | 1.19 (1.08 - 1.32) | 6.23*10 <sup>-01</sup> | 1.01 (0.97 - 1.06) |
| rs6444501  | 3   | 192302936     | intergenic        | T/G                 | 0.3716         | 1.96*10 <sup>-04</sup> | 1.17 (1.08 - 1.27) | 1.99*10 <sup>-02</sup> | 1.05 (1.01 - 1.09) |
| rs4834896  | 4   | 12402859      | AC096750.3        | T/A                 | 0.6574         | 1.69*10 <sup>-04</sup> | 1.17 (1.07 - 1.27) | 1.04*10 <sup>-04</sup> | 1.09 (1.04 - 1.14) |
| rs807423   | 4   | 12411153      | AC096750.3        | C/T                 | 0.6442         | 1.84*10 <sup>-04</sup> | 1.16 (1.07 - 1.26) | 9.40*10 <sup>-04</sup> | 1.07 (1.03 - 1.11) |
| rs807424   | 4   | 12411472      | AC096750.3        | T/C                 | 0.6075         | 2.22*10 <sup>-04</sup> | 1.15 (1.06 - 1.25) | 3.48*10 <sup>-03</sup> | 1.06 (1.02 - 1.10) |
| rs17829676 | 4   | 16743156      | intergenic        | G/A                 | 0.1242         | 6.64*10 <sup>-04</sup> | 1.23 (1.09 - 1.39) | 7.95*10 <sup>-01</sup> | 1.01 (0.95 - 1.07) |
| rs17771233 | 4   | 16817698      | intergenic        | A/G                 | 0.0892         | 3.75*10 <sup>-04</sup> | 1.28 (1.12 - 1.47) | 1.45*10 <sup>-01</sup> | 1.06 (0.98 - 1.14) |
| rs429783   | 4   | 21181666      | KCNIP4            | C/A                 | 0.1651         | 2.95*10 <sup>-04</sup> | 1.2 (1.08 - 1.34)  | 2.81*10 <sup>-04</sup> | 1.15 (1.07 - 1.24) |
| rs10517008 | 4   | 22881295      | intergenic        | C/G                 | 0.1118         | 6.49*10 <sup>-04</sup> | 1.24 (1.1 - 1.41)  | 8.01*10 <sup>-03</sup> | 1.11 (1.03 - 1.19) |
| rs2968711  | 4   | 22958419      | intergenic        | A/G                 | 0.2176         | 1.24*10 <sup>-04</sup> | 1.21 (1.1 - 1.33)  | 3.55*10 <sup>-02</sup> | 1.05 (1.00 - 1.09) |
| rs2940774  | 4   | 22958441      | intergenic        | T/C                 | 0.2169         | 4.26*10 <sup>-05</sup> | 1.22 (1.11 - 1.35) | 3.22*10 <sup>-02</sup> | 1.05 (1.00 - 1.10) |
| rs7666498  | 4   | 22965822      | intergenic        | C/T                 | 0.2334         | 2.73*10 <sup>-04</sup> | 1.19 (1.08 - 1.31) | 9.32*10 <sup>-03</sup> | 1.06 (1.01 - 1.11) |
| rs1467030  | 4   | 22972687      | intergenic        | C/T                 | 0.2529         | 1.40*10 <sup>-04</sup> | 1.19 (1.09 - 1.31) | 6.87*10 <sup>-03</sup> | 1.06 (1.02 - 1.10) |
| rs1509241  | 4   | 22973591      | intergenic        | T/C                 | 0.5719         | 7.89*10 <sup>-04</sup> | 1.15 (1.06 - 1.25) | 1.37*10 <sup>-01</sup> | 1.03 (0.99 - 1.08) |
| rs7672988  | 4   | 22975875      | intergenic        | A/C                 | 0.2307         | 2.54*10 <sup>-05</sup> | 1.23 (1.11 - 1.35) | 3.88*10 <sup>-03</sup> | 1.07 (1.02 - 1.13) |
| rs215475   | 4   | 22997497      | intergenic        | A/G                 | 0.2443         | 3.51*10 <sup>-04</sup> | 1.18 (1.08 - 1.3)  | 2.64*10 <sup>-03</sup> | 1.12 (1.04 - 1.21) |
| rs1605813  | 4   | 23039866      | intergenic        | A/G                 | 0.5626         | 8.17*10 <sup>-04</sup> | 1.15 (1.06 - 1.25) | 8.20*10 <sup>-02</sup> | 1.04 (0.99 - 1.09) |
| rs177357   | 4   | 23053543      | intergenic        | T/C                 | 0.3015         | 3.07*10 <sup>-05</sup> | 1.2 (1.1 - 1.31)   | 6.50*10 <sup>-03</sup> | 1.06 (1.02 - 1.11) |
| rs123495   | 4   | 23054277      | intergenic        | T/C                 | 0.3041         | 1.09*10 <sup>-05</sup> | 1.22 (1.11 - 1.33) | 4.93*10 <sup>-03</sup> | 1.06 (1.02 - 1.10) |
| rs123494   | 4   | 23054310      | intergenic        | G/C                 | 0.3036         | 2.66*10 <sup>-05</sup> | 1.2 (1.1 - 1.31)   | 5.24*10 <sup>-03</sup> | 1.06 (1.02 - 1.10) |
| rs215437   | 4   | 23056004      | intergenic        | C/G                 | 0.3001         | 3.92*10 <sup>-05</sup> | 1.2 (1.1 - 1.31)   | 5.37*10 <sup>-03</sup> | 1.06 (1.02 - 1.10) |
| rs4692290  | 4   | 27791972      | intergenic        | G/A                 | 0.5136         | 1.98*10 <sup>-04</sup> | 1.14 (1.06 - 1.24) | 1.45*10 <sup>-02</sup> | 1.07 (1.01 - 1.13) |



| SNP        | Chr | Position (bp) | Gene                 | Risk/NonRisk Allele | Risk frequency | GWA                    |                    | Pooled analysis        |                    |
|------------|-----|---------------|----------------------|---------------------|----------------|------------------------|--------------------|------------------------|--------------------|
|            |     |               |                      |                     |                | P Value                | OR (95% CI)        | P Value                | OR (95% CI)        |
| rs1907472  | 4   | 31838960      | intergenic           | A/G                 | 0.4573         | 8.40*10 <sup>-04</sup> | 1.15 (1.06 - 1.24) | 2.59*10 <sup>-01</sup> | 1.02 (0.98 - 1.07) |
| rs17365051 | 4   | 31845185      | intergenic           | T/C                 | 0.4167         | 2.83*10 <sup>-04</sup> | 1.16 (1.07 - 1.26) | 6.99*10 <sup>-01</sup> | 1.01 (0.97 - 1.04) |
| rs17299248 | 4   | 31845304      | intergenic           | G/A                 | 0.4150         | 5.42*10 <sup>-04</sup> | 1.15 (1.06 - 1.25) | 6.77*10 <sup>-01</sup> | 1.01 (0.97 - 1.05) |
| rs7673436  | 4   | 31863047      | intergenic           | T/G                 | 0.4058         | 3.86*10 <sup>-04</sup> | 1.16 (1.07 - 1.26) | 1.24*10 <sup>-02</sup> | 1.07 (1.02 - 1.14) |
| rs902658   | 4   | 31864983      | intergenic           | T/C                 | 0.4052         | 5.95*10 <sup>-04</sup> | 1.15 (1.06 - 1.25) | 2.94*10 <sup>-01</sup> | 1.02 (0.98 - 1.07) |
| rs902660   | 4   | 31865092      | intergenic           | C/A                 | 0.4588         | 7.51*10 <sup>-04</sup> | 1.15 (1.06 - 1.24) | 4.66*10 <sup>-01</sup> | 1.02 (0.97 - 1.06) |
| rs2404759  | 4   | 31865170      | intergenic           | A/C                 | 0.4047         | 6.91*10 <sup>-04</sup> | 1.15 (1.06 - 1.25) | 3.06*10 <sup>-01</sup> | 1.02 (0.98 - 1.06) |
| rs874498   | 4   | 31865900      | intergenic           | T/C                 | 0.4043         | 6.31*10 <sup>-04</sup> | 1.15 (1.06 - 1.25) | 1.88*10 <sup>-01</sup> | 1.03 (0.99 - 1.08) |
| rs10001109 | 4   | 44599410      | intergenic           | T/C                 | 0.9039         | 5.23*10 <sup>-04</sup> | 1.28 (1.11 - 1.48) | 1.73*10 <sup>-02</sup> | 1.08 (1.01 - 1.14) |
| rs13106834 | 4   | 55196485      | intergenic           | A/G                 | 0.5343         | 4.82*10 <sup>-04</sup> | 1.15 (1.06 - 1.25) | 9.00*10 <sup>-01</sup> | 1.00 (0.96 - 1.04) |
| rs17086853 | 4   | 57047076      | SRP72                | A/G                 | 0.8234         | 9.49*10 <sup>-04</sup> | 1.19 (1.07 - 1.33) | 1.83*10 <sup>-01</sup> | 1.03 (0.99 - 1.08) |
| rs869894   | 4   | 71086741      | intergenic           | C/A                 | 0.5648         | 9.04*10 <sup>-04</sup> | 1.15 (1.06 - 1.24) | 7.05*10 <sup>-03</sup> | 1.06 (1.02 - 1.11) |
| rs1825032  | 4   | 71241407      | C4orf35              | C/T                 | 0.6124         | 3.85*10 <sup>-04</sup> | 1.16 (1.07 - 1.26) | 6.12*10 <sup>-02</sup> | 1.04 (1.00 - 1.08) |
| rs17146505 | 4   | 71326067      | intergenic           | T/C                 | 0.8873         | 1.12*10 <sup>-04</sup> | 1.29 (1.13 - 1.47) | 2.31*10 <sup>-02</sup> | 1.08 (1.01 - 1.16) |
| rs16996713 | 4   | 75989935      | intergenic           | G/T                 | 0.9174         | 2.37*10 <sup>-04</sup> | 1.32 (1.14 - 1.54) | 7.00*10 <sup>-02</sup> | 1.08 (0.99 - 1.17) |
| rs1580043  | 4   | 75992411      | intergenic           | A/C                 | 0.9162         | 3.40*10 <sup>-04</sup> | 1.31 (1.13 - 1.52) | 1.26*10 <sup>-01</sup> | 1.06 (0.98 - 1.14) |
| rs16999967 | 4   | 76016027      | intergenic           | A/C                 | 0.9160         | 8.35*10 <sup>-04</sup> | 1.28 (1.11 - 1.49) | 1.59*10 <sup>-01</sup> | 1.06 (0.98 - 1.14) |
| rs10518131 | 4   | 76018616      | intergenic           | C/T                 | 0.9168         | 5.00*10 <sup>-04</sup> | 1.3 (1.12 - 1.51)  | 1.78*10 <sup>-01</sup> | 1.05 (0.98 - 1.12) |
| rs17248248 | 4   | 76031071      | intergenic           | G/A                 | 0.9163         | 3.77*10 <sup>-04</sup> | 1.31 (1.13 - 1.51) | 1.26*10 <sup>-01</sup> | 1.05 (0.99 - 1.13) |
| rs7660335  | 4   | 76034905      | intergenic           | C/G                 | 0.9163         | 3.77*10 <sup>-04</sup> | 1.31 (1.13 - 1.51) | 1.19*10 <sup>-01</sup> | 1.06 (0.99 - 1.13) |
| rs7668508  | 4   | 76038964      | intergenic           | G/C                 | 0.9170         | 2.99*10 <sup>-04</sup> | 1.31 (1.13 - 1.52) | 1.43*10 <sup>-01</sup> | 1.06 (0.98 - 1.14) |
| rs6533486  | 4   | 76078596      | AC110760.3           | C/T                 | 0.9087         | 2.99*10 <sup>-04</sup> | 1.3 (1.13 - 1.5)   | 3.62*10 <sup>-01</sup> | 1.03 (0.97 - 1.10) |
| rs17248887 | 4   | 76080991      | AC110760.3           | G/A                 | 0.9073         | 7.20*10 <sup>-04</sup> | 1.27 (1.11 - 1.47) | 4.56*10 <sup>-01</sup> | 1.03 (0.96 - 1.10) |
| rs7666000  | 4   | 77643030      | SHROOM3              | G/A                 | 0.8561         | 2.71*10 <sup>-04</sup> | 1.24 (1.1 - 1.39)  | 7.93*10 <sup>-04</sup> | 1.10 (1.04 - 1.16) |
| rs7696372  | 4   | 77643191      | SHROOM3              | T/C                 | 0.8564         | 3.43*10 <sup>-04</sup> | 1.23 (1.1 - 1.39)  | 4.55*10 <sup>-04</sup> | 1.10 (1.04 - 1.16) |
| rs6532433  | 4   | 77643282      | SHROOM3              | T/C                 | 0.8565         | 3.69*10 <sup>-04</sup> | 1.23 (1.1 - 1.38)  | 1.09*10 <sup>-03</sup> | 1.09 (1.04 - 1.16) |
| rs17012341 | 4   | 88202140      | AFF1                 | A/T                 | 0.0239         | 1.41*10 <sup>-04</sup> | 1.62 (1.25 - 2.08) | 9.15*10 <sup>-01</sup> | 1.01 (0.89 - 1.14) |
| rs236990   | 4   | 88234410      | AFF1                 | G/A                 | 0.0250         | 4.68*10 <sup>-04</sup> | 1.54 (1.2 - 1.97)  | 6.48*10 <sup>-01</sup> | 1.03 (0.9 - 1.18)  |
| rs17012552 | 4   | 88345242      | KLHL8,<br>AC092658.2 | T/C                 | 0.0345         | 1.21*10 <sup>-04</sup> | 1.44 (1.17 - 1.79) | 3.81*10 <sup>-01</sup> | 1.07 (0.92 - 1.24) |
| rs10012150 | 4   | 89124819      | SPP1                 | C/T                 | 0.2201         | 1.92*10 <sup>-04</sup> | 1.19 (1.08 - 1.31) | 1.58*10 <sup>-01</sup> | 1.04 (0.99 - 1.09) |
| rs2658535  | 4   | 103190039     | BANK1                | A/G                 | 0.5619         | 9.01*10 <sup>-04</sup> | 1.15 (1.06 - 1.24) | 4.14*10 <sup>-03</sup> | 1.09 (1.03 - 1.15) |
| rs1395306  | 4   | 103204873     | BANK1                | T/C                 | 0.5585         | 7.38*10 <sup>-04</sup> | 1.15 (1.06 - 1.24) | 9.93*10 <sup>-02</sup> | 1.04 (0.99 - 1.08) |
| rs2129292  | 4   | 103210162     | BANK1                | G/C                 | 0.5596         | 8.30*10 <sup>-04</sup> | 1.15 (1.06 - 1.24) | 7.69*10 <sup>-02</sup> | 1.04 (1.00 - 1.08) |
| rs7675363  | 4   | 103217890     | BANK1                | T/C                 | 0.5613         | 2.15*10 <sup>-04</sup> | 1.16 (1.08 - 1.26) | 3.64*10 <sup>-03</sup> | 1.06 (1.02 - 1.10) |

| SNP        | Chr | Position (bp) | Gene       | Risk/NonRisk Allele | Risk frequency | GWA                    |                    | Pooled analysis        |                    |
|------------|-----|---------------|------------|---------------------|----------------|------------------------|--------------------|------------------------|--------------------|
|            |     |               |            |                     |                | P Value                | OR (95% CI)        | P Value                | OR (95% CI)        |
| rs1506504  | 4   | 103266786     | intergenic | C/T                 | 0.5629         | 8.50*10 <sup>-04</sup> | 1.15 (1.06 - 1.24) | 5.36*10 <sup>-02</sup> | 1.04 (1.00 - 1.09) |
| rs1216413  | 4   | 129749566     | intergenic | A/G                 | 0.6617         | 8.55*10 <sup>-04</sup> | 1.16 (1.06 - 1.26) | 8.70*10 <sup>-02</sup> | 1.04 (0.99 - 1.08) |
| rs17401445 | 4   | 129751887     | intergenic | T/C                 | 0.6653         | 1.86*10 <sup>-04</sup> | 1.18 (1.08 - 1.28) | 8.74*10 <sup>-02</sup> | 1.03 (1.00 - 1.08) |
| rs4975242  | 4   | 129752818     | intergenic | T/A                 | 0.6629         | 8.57*10 <sup>-04</sup> | 1.16 (1.06 - 1.26) | 8.95*10 <sup>-02</sup> | 1.04 (0.99 - 1.08) |
| rs6822222  | 4   | 136981443     | intergenic | G/T                 | 0.8962         | 7.82*10 <sup>-04</sup> | 1.23 (1.08 - 1.41) | 4.14*10 <sup>-01</sup> | 1.03 (0.96 - 1.09) |
| rs12646936 | 4   | 136982089     | intergenic | G/T                 | 0.7513         | 2.19*10 <sup>-07</sup> | 1.25 (1.14 - 1.38) | 1.98*10 <sup>-04</sup> | 1.08 (1.04 - 1.13) |
| rs1115338  | 4   | 137402957     | intergenic | C/A                 | 0.9489         | 1.02*10 <sup>-04</sup> | 1.38 (1.15 - 1.67) | 5.06*10 <sup>-02</sup> | 1.14 (1.00 - 1.30) |
| rs17644158 | 4   | 138347295     | intergenic | G/T                 | 0.1756         | 2.44*10 <sup>-04</sup> | 1.22 (1.1 - 1.35)  | 7.19*10 <sup>-02</sup> | 1.05 (1.00 - 1.10) |
| rs2138071  | 4   | 138373178     | AC060835.7 | A/G                 | 0.4905         | 2.50*10 <sup>-04</sup> | 1.16 (1.07 - 1.25) | 6.80*10 <sup>-03</sup> | 1.05 (1.01 - 1.09) |
| rs1822841  | 4   | 145062088     | intergenic | G/T                 | 0.3226         | 2.77*10 <sup>-04</sup> | 1.15 (1.06 - 1.26) | 4.21*10 <sup>-01</sup> | 1.02 (0.98 - 1.06) |
| rs7686794  | 4   | 145068523     | intergenic | G/A                 | 0.3229         | 2.75*10 <sup>-04</sup> | 1.15 (1.06 - 1.26) | 1.64*10 <sup>-01</sup> | 1.04 (0.98 - 1.11) |
| rs4407483  | 4   | 150076291     | intergenic | C/T                 | 0.1166         | 2.50*10 <sup>-04</sup> | 1.23 (1.09 - 1.4)  | 1.11*10 <sup>-02</sup> | 1.12 (1.03 - 1.22) |
| rs1124359  | 4   | 151338803     | DCLK2      | A/G                 | 0.0656         | 9.13*10 <sup>-04</sup> | 1.31 (1.12 - 1.54) | 1.78*10 <sup>-01</sup> | 1.06 (0.97 - 1.15) |
| rs17504359 | 4   | 151526571     | LRBA       | G/C                 | 0.1765         | 9.77*10 <sup>-04</sup> | 1.19 (1.07 - 1.32) | 2.68*10 <sup>-01</sup> | 1.03 (0.98 - 1.08) |
| rs12499470 | 4   | 151540691     | LRBA       | C/A                 | 0.1766         | 7.96*10 <sup>-04</sup> | 1.19 (1.07 - 1.32) | 2.63*10 <sup>-01</sup> | 1.03 (0.98 - 1.08) |
| rs2036552  | 4   | 151617209     | LRBA       | G/A                 | 0.1757         | 4.80*10 <sup>-04</sup> | 1.2 (1.08 - 1.33)  | 3.08*10 <sup>-01</sup> | 1.03 (0.98 - 1.08) |
| rs35198214 | 4   | 152406827     | intergenic | A/G                 | 0.0610         | 3.90*10 <sup>-04</sup> | 1.32 (1.12 - 1.56) | 2.21*10 <sup>-03</sup> | 1.19 (1.07 - 1.33) |
| rs7676376  | 4   | 158061609     | PDGFC      | C/T                 | 0.7157         | 6.08*10 <sup>-04</sup> | 1.17 (1.07 - 1.28) | 1.25*10 <sup>-01</sup> | 1.04 (0.99 - 1.09) |
| rs1505387  | 4   | 165583359     | intergenic | A/C                 | 0.1995         | 6.00*10 <sup>-05</sup> | 1.2 (1.09 - 1.32)  | 1.96*10 <sup>-02</sup> | 1.09 (1.01 - 1.16) |
| rs325597   | 4   | 165602971     | intergenic | T/C                 | 0.1817         | 1.11*10 <sup>-04</sup> | 1.19 (1.08 - 1.32) | 1.04*10 <sup>-02</sup> | 1.06 (1.01 - 1.11) |
| rs1587920  | 4   | 165608336     | intergenic | A/G                 | 0.1785         | 9.59*10 <sup>-05</sup> | 1.2 (1.08 - 1.33)  | 6.81*10 <sup>-03</sup> | 1.07 (1.02 - 1.12) |
| rs1463926  | 4   | 165628896     | intergenic | C/A                 | 0.1842         | 6.96*10 <sup>-05</sup> | 1.19 (1.08 - 1.32) | 2.46*10 <sup>-02</sup> | 1.06 (1.01 - 1.12) |
| rs12511498 | 4   | 168890172     | intergenic | C/G                 | 0.2087         | 2.08*10 <sup>-04</sup> | 1.18 (1.07 - 1.31) | 8.08*10 <sup>-03</sup> | 1.08 (1.02 - 1.14) |
| rs4331802  | 4   | 168892949     | intergenic | G/T                 | 0.2325         | 1.18*10 <sup>-05</sup> | 1.2 (1.09 - 1.32)  | 1.90*10 <sup>-03</sup> | 1.11 (1.04 - 1.19) |
| rs7686609  | 4   | 168895506     | intergenic | G/A                 | 0.2580         | 8.17*10 <sup>-05</sup> | 1.17 (1.07 - 1.28) | 1.12*10 <sup>-04</sup> | 1.10 (1.05 - 1.16) |
| rs11131794 | 4   | 168896676     | intergenic | G/A                 | 0.2317         | 3.43*10 <sup>-06</sup> | 1.21 (1.11 - 1.33) | 1.13*10 <sup>-04</sup> | 1.09 (1.04 - 1.14) |
| rs1507696  | 4   | 171684809     | intergenic | T/C                 | 0.3369         | 9.29*10 <sup>-04</sup> | 1.16 (1.06 - 1.26) | 2.86*10 <sup>-06</sup> | 1.12 (1.07 - 1.17) |
| rs2612412  | 4   | 171695929     | intergenic | A/G                 | 0.3380         | 4.03*10 <sup>-04</sup> | 1.17 (1.07 - 1.27) | 2.03*10 <sup>-05</sup> | 1.09 (1.05 - 1.13) |
| rs368771   | 4   | 171750312     | HSP90AA6P  | C/A                 | 0.3343         | 5.07*10 <sup>-04</sup> | 1.16 (1.07 - 1.27) | 9.11*10 <sup>-06</sup> | 1.09 (1.05 - 1.13) |
| rs4692845  | 4   | 171771856     | intergenic | A/G                 | 0.3363         | 5.15*10 <sup>-04</sup> | 1.16 (1.07 - 1.27) | 6.57*10 <sup>-06</sup> | 1.09 (1.05 - 1.13) |
| rs1348330  | 4   | 171789432     | intergenic | C/T                 | 0.3376         | 2.79*10 <sup>-04</sup> | 1.17 (1.08 - 1.27) | 6.44*10 <sup>-06</sup> | 1.09 (1.05 - 1.13) |
| rs1533835  | 4   | 171881782     | intergenic | T/G                 | 0.0323         | 3.61*10 <sup>-04</sup> | 1.49 (1.2 - 1.86)  | 7.10*10 <sup>-03</sup> | 1.16 (1.04 - 1.29) |
| rs17059546 | 4   | 174689637     | HAND2      | C/T                 | 0.2524         | 1.19*10 <sup>-04</sup> | 1.2 (1.09 - 1.31)  | 1.57*10 <sup>-02</sup> | 1.05 (1.01 - 1.10) |
| rs2010595  | 4   | 182852097     | intergenic | T/G                 | 0.8444         | 7.28*10 <sup>-05</sup> | 1.26 (1.12 - 1.42) | 4.16*10 <sup>-01</sup> | 1.02 (0.97 - 1.07) |
| rs715654   | 4   | 182852487     | intergenic | G/A                 | 0.8384         | 2.42*10 <sup>-05</sup> | 1.27 (1.14 - 1.42) | 3.83*10 <sup>-01</sup> | 1.02 (0.97 - 1.07) |

| SNP        | Chr | Position (bp) | Gene       | Risk/NonRisk Allele | Risk frequency | GWA                    |                    | Pooled analysis        |                    |
|------------|-----|---------------|------------|---------------------|----------------|------------------------|--------------------|------------------------|--------------------|
|            |     |               |            |                     |                | P Value                | OR (95% CI)        | P Value                | OR (95% CI)        |
| rs7696504  | 4   | 182853489     | intergenic | G/C                 | 0.8385         | 4.71*10 <sup>-05</sup> | 1.26 (1.13 - 1.41) | 4.60*10 <sup>-01</sup> | 1.02 (0.97 - 1.07) |
| rs7697691  | 4   | 182853951     | intergenic | A/G                 | 0.8381         | 6.88*10 <sup>-05</sup> | 1.25 (1.12 - 1.4)  | 3.93*10 <sup>-01</sup> | 1.02 (0.97 - 1.07) |
| rs35306465 | 4   | 183306697     | AC108142.1 | C/G                 | 0.1008         | 5.48*10 <sup>-04</sup> | 1.25 (1.1 - 1.43)  | 2.37*10 <sup>-03</sup> | 1.15 (1.05 - 1.27) |
| rs12504307 | 4   | 186980251     | SORBS2     | G/C                 | 0.5285         | 4.35*10 <sup>-05</sup> | 1.19 (1.09 - 1.29) | 8.63*10 <sup>-01</sup> | 1.00 (0.97 - 1.04) |
| rs1499012  | 4   | 186996149     | SORBS2     | G/A                 | 0.2509         | 9.12*10 <sup>-04</sup> | 1.17 (1.07 - 1.28) | 2.76*10 <sup>-01</sup> | 1.03 (0.98 - 1.08) |
| rs4241895  | 4   | 189765825     | intergenic | C/T                 | 0.2201         | 9.01*10 <sup>-04</sup> | 1.17 (1.07 - 1.29) | 5.10*10 <sup>-03</sup> | 1.08 (1.02 - 1.14) |
| rs2099821  | 5   | 3276744       | intergenic | A/G                 | 0.1715         | 1.33*10 <sup>-04</sup> | 1.19 (1.07 - 1.32) | 6.07*10 <sup>-01</sup> | 1.01 (0.96 - 1.07) |
| rs12658153 | 5   | 3277850       | intergenic | G/A                 | 0.1709         | 9.45*10 <sup>-05</sup> | 1.2 (1.08 - 1.33)  | 9.49*10 <sup>-01</sup> | 1.00 (0.95 - 1.05) |
| rs6892726  | 5   | 3288797       | intergenic | T/C                 | 0.1680         | 4.20*10 <sup>-05</sup> | 1.2 (1.08 - 1.34)  | 9.31*10 <sup>-01</sup> | 1.00 (0.95 - 1.05) |
| rs13165026 | 5   | 3302967       | intergenic | T/C                 | 0.1597         | 5.33*10 <sup>-06</sup> | 1.24 (1.11 - 1.38) | 9.80*10 <sup>-01</sup> | 1.00 (0.95 - 1.06) |
| rs10462777 | 5   | 3847274       | intergenic | C/T                 | 0.1967         | 4.19*10 <sup>-04</sup> | 1.2 (1.08 - 1.32)  | 4.02*10 <sup>-01</sup> | 1.02 (0.97 - 1.07) |
| rs4407602  | 5   | 4721289       | intergenic | A/G                 | 0.7377         | 2.23*10 <sup>-04</sup> | 1.19 (1.08 - 1.3)  | 1.31*10 <sup>-03</sup> | 1.07 (1.03 - 1.12) |
| rs835129   | 5   | 14964568      | AC016575.7 | G/A                 | 0.4956         | 5.57*10 <sup>-04</sup> | 1.15 (1.06 - 1.25) | 2.35*10 <sup>-01</sup> | 1.02 (0.98 - 1.07) |
| rs10077552 | 5   | 14964899      | AC016575.7 | T/C                 | 0.4436         | 5.15*10 <sup>-04</sup> | 1.15 (1.06 - 1.25) | 3.52*10 <sup>-01</sup> | 1.02 (0.98 - 1.06) |
| rs17579256 | 5   | 29918764      | intergenic | T/G                 | 0.8413         | 9.84*10 <sup>-04</sup> | 1.2 (1.08 - 1.34)  | 8.39*10 <sup>-04</sup> | 1.10 (1.04 - 1.17) |
| rs27573    | 5   | 55603506      | intergenic | C/A                 | 0.9452         | 7.71*10 <sup>-06</sup> | 1.52 (1.26 - 1.84) | 1.45*10 <sup>-02</sup> | 1.12 (1.02 - 1.23) |
| rs4613646  | 5   | 65949148      | MAST4      | C/T                 | 0.6552         | 7.43*10 <sup>-04</sup> | 1.15 (1.06 - 1.26) | 2.00*10 <sup>-01</sup> | 1.03 (0.99 - 1.07) |
| rs12521662 | 5   | 88117252      | MEF2C      | A/G                 | 0.1495         | 1.88*10 <sup>-04</sup> | 1.23 (1.1 - 1.37)  | 9.97*10 <sup>-04</sup> | 1.10 (1.04 - 1.16) |
| rs10070532 | 5   | 88799971      | intergenic | G/A                 | 0.7199         | 5.65*10 <sup>-05</sup> | 1.2 (1.1 - 1.32)   | 5.98*10 <sup>-02</sup> | 1.05 (1.00 - 1.10) |
| rs27515    | 5   | 111424577     | intergenic | G/T                 | 0.0464         | 5.13*10 <sup>-04</sup> | 1.39 (1.15 - 1.68) | 1.58*10 <sup>-01</sup> | 1.06 (0.98 - 1.16) |
| rs163622   | 5   | 111821853     | intergenic | T/C                 | 0.0587         | 3.77*10 <sup>-04</sup> | 1.35 (1.14 - 1.6)  | 3.32*10 <sup>-01</sup> | 1.06 (0.94 - 1.19) |
| rs13181732 | 5   | 112752677     | MCC        | T/C                 | 0.8137         | 3.09*10 <sup>-04</sup> | 1.21 (1.09 - 1.35) | 7.59*10 <sup>-02</sup> | 1.05 (1.00 - 1.10) |
| rs269498   | 5   | 114685142     | intergenic | A/G                 | 0.8999         | 6.16*10 <sup>-04</sup> | 1.27 (1.11 - 1.45) | 1.51*10 <sup>-01</sup> | 1.05 (0.98 - 1.12) |
| rs13357651 | 5   | 115286854     | intergenic | G/A                 | 0.9576         | 1.58*10 <sup>-04</sup> | 1.5 (1.21 - 1.85)  | 1.07*10 <sup>-04</sup> | 1.32 (1.15 - 1.53) |
| rs3861862  | 5   | 141822876     | intergenic | C/G                 | 0.8926         | 4.95*10 <sup>-04</sup> | 1.27 (1.11 - 1.45) | 4.16*10 <sup>-01</sup> | 1.03 (0.96 - 1.09) |
| rs13184016 | 5   | 145140536     | PRELID2    | C/T                 | 0.9620         | 5.93*10 <sup>-04</sup> | 1.47 (1.18 - 1.83) | 8.80*10 <sup>-01</sup> | 1.02 (0.81 - 1.28) |
| rs304842   | 5   | 152763791     | intergenic | T/C                 | 0.3454         | 8.81*10 <sup>-04</sup> | 1.16 (1.06 - 1.26) | 2.94*10 <sup>-01</sup> | 1.02 (0.98 - 1.06) |
| rs1874161  | 5   | 157548288     | intergenic | C/A                 | 0.9276         | 7.51*10 <sup>-05</sup> | 1.34 (1.14 - 1.57) | 4.47*10 <sup>-01</sup> | 1.03 (0.95 - 1.11) |
| rs1874160  | 5   | 157548726     | intergenic | C/T                 | 0.9266         | 8.70*10 <sup>-05</sup> | 1.34 (1.14 - 1.57) | 5.91*10 <sup>-01</sup> | 1.02 (0.95 - 1.10) |
| rs11746023 | 5   | 157579894     | intergenic | C/T                 | 0.8424         | 4.47*10 <sup>-04</sup> | 1.21 (1.08 - 1.35) | 3.38*10 <sup>-01</sup> | 1.03 (0.97 - 1.09) |
| rs4704967  | 5   | 158192277     | EBF1       | G/T                 | 0.7720         | 9.94*10 <sup>-04</sup> | 1.17 (1.07 - 1.29) | 6.01*10 <sup>-01</sup> | 1.01 (0.97 - 1.06) |
| rs6868079  | 5   | 164043770     | intergenic | A/G                 | 0.1318         | 3.10*10 <sup>-04</sup> | 1.24 (1.1 - 1.39)  | 9.03*10 <sup>-01</sup> | 1.00 (0.95 - 1.06) |
| rs11739137 | 5   | 164115462     | intergenic | G/C                 | 0.1333         | 8.62*10 <sup>-04</sup> | 1.22 (1.08 - 1.36) | 7.92*10 <sup>-01</sup> | 1.01 (0.95 - 1.06) |
| rs10462960 | 5   | 166058138     | intergenic | T/G                 | 0.0355         | 5.13*10 <sup>-04</sup> | 1.45 (1.17 - 1.79) | 2.13*10 <sup>-02</sup> | 1.14 (1.02 - 1.26) |
| rs10067964 | 5   | 168458268     | SLIT3      | T/C                 | 0.6715         | 2.45*10 <sup>-04</sup> | 1.17 (1.08 - 1.28) | 1.34*10 <sup>-01</sup> | 1.04 (0.99 - 1.09) |

| SNP       | Chr | Position (bp) | Gene                                                                                                                                                   | Risk/NonRisk Allele | Risk frequency | GWA                    |                    | Pooled analysis        |                    |
|-----------|-----|---------------|--------------------------------------------------------------------------------------------------------------------------------------------------------|---------------------|----------------|------------------------|--------------------|------------------------|--------------------|
|           |     |               |                                                                                                                                                        |                     |                | P Value                | OR (95% CI)        | P Value                | OR (95% CI)        |
| rs703745  | 5   | 174726970     | intergenic                                                                                                                                             | A/G                 | 0.7150         | 2.59*10 <sup>-04</sup> | 1.16 (1.06 - 1.27) | 8.58*10 <sup>-01</sup> | 1.00 (0.96 - 1.05) |
| rs2303010 | 5   | 179684637     | GFPT2                                                                                                                                                  | T/C                 | 0.0108         | 9.48*10 <sup>-04</sup> | 1.85 (1.26 - 2.71) | 2.74*10 <sup>-02</sup> | 1.40 (1.04 - 1.89) |
| rs2505675 | 6   | 2300674       | intergenic                                                                                                                                             | C/T                 | 0.6913         | 9.57*10 <sup>-04</sup> | 1.16 (1.06 - 1.26) | 1.36*10 <sup>-02</sup> | 1.06 (1.01 - 1.10) |
| rs9328347 | 6   | 6219946       | F13A1                                                                                                                                                  | A/G                 | 0.1563         | 4.87*10 <sup>-04</sup> | 1.22 (1.09 - 1.36) | 2.86*10 <sup>-01</sup> | 1.03 (0.98 - 1.09) |
| rs9396814 | 6   | 10126510      | intergenic                                                                                                                                             | T/C                 | 0.2785         | 8.06*10 <sup>-04</sup> | 1.16 (1.07 - 1.27) | 1.72*10 <sup>-01</sup> | 1.03 (0.99 - 1.07) |
| rs9383331 | 6   | 10126740      | intergenic                                                                                                                                             | G/A                 | 0.2785         | 8.74*10 <sup>-04</sup> | 1.16 (1.06 - 1.27) | 8.12*10 <sup>-02</sup> | 1.04 (0.99 - 1.09) |
| rs1267505 | 6   | 14822174      | intergenic                                                                                                                                             | T/C                 | 0.8099         | 5.83*10 <sup>-04</sup> | 1.2 (1.08 - 1.33)  | 8.49*10 <sup>-01</sup> | 1.00 (0.96 - 1.05) |
| rs1267500 | 6   | 14823804      | intergenic                                                                                                                                             | T/C                 | 0.8118         | 7.99*10 <sup>-04</sup> | 1.19 (1.08 - 1.32) | 7.77*10 <sup>-01</sup> | 1.01 (0.96 - 1.05) |
| rs1267496 | 6   | 14823996      | intergenic                                                                                                                                             | C/G                 | 0.8098         | 3.10*10 <sup>-04</sup> | 1.21 (1.09 - 1.34) | 5.91*10 <sup>-01</sup> | 1.01 (0.97 - 1.06) |
| rs1267495 | 6   | 14824016      | intergenic                                                                                                                                             | T/C                 | 0.8099         | 3.55*10 <sup>-04</sup> | 1.21 (1.09 - 1.34) | 6.43*10 <sup>-01</sup> | 1.01 (0.97 - 1.06) |
| rs1267494 | 6   | 14824189      | intergenic                                                                                                                                             | C/G                 | 0.8200         | 7.17*10 <sup>-04</sup> | 1.2 (1.08 - 1.33)  | 6.94*10 <sup>-01</sup> | 1.01 (0.96 - 1.06) |
| rs17119   | 6   | 14827475      | intergenic                                                                                                                                             | A/G                 | 0.8058         | 2.98*10 <sup>-04</sup> | 1.21 (1.09 - 1.34) | 6.81*10 <sup>-01</sup> | 1.01 (0.96 - 1.06) |
| rs1267488 | 6   | 14827973      | intergenic                                                                                                                                             | A/G                 | 0.8325         | 9.71*10 <sup>-04</sup> | 1.2 (1.08 - 1.34)  | 7.58*10 <sup>-01</sup> | 1.01 (0.96 - 1.06) |
| rs4712625 | 6   | 21807321      | intergenic                                                                                                                                             | A/G                 | 0.1360         | 8.03*10 <sup>-04</sup> | 1.22 (1.09 - 1.37) | 5.89*10 <sup>-03</sup> | 1.12 (1.03 - 1.22) |
| rs1610585 | 6   | 29783655      | AL844851.4-205,<br>ZDHHHC20P1,<br>AL669813.6-206                                                                                                       | C/G                 | 0.2876         | 4.50*10 <sup>-04</sup> | 1.17 (1.07 - 1.28) | 7.71*10 <sup>-03</sup> | 1.06 (1.01 - 1.10) |
| rs1610586 | 6   | 29784295      | AL844851.4-205,<br>ZDHHHC20P1,<br>AL669813.6-206                                                                                                       | T/C                 | 0.2871         | 5.45*10 <sup>-04</sup> | 1.17 (1.07 - 1.28) | 7.86*10 <sup>-03</sup> | 1.06 (1.01 - 1.10) |
| rs1611356 | 6   | 29786995      | AL844851.4-205,<br>ZDHHHC20P1,<br>AL669813.6-206                                                                                                       | C/G                 | 0.2873         | 7.27*10 <sup>-04</sup> | 1.16 (1.07 - 1.27) | 1.42*10 <sup>-02</sup> | 1.05 (1.01 - 1.09) |
| rs1611381 | 6   | 29788471      | AL844851.4-205,<br>ZDHHHC20P1,<br>AL669813.6-206                                                                                                       | T/C                 | 0.2873         | 7.08*10 <sup>-04</sup> | 1.16 (1.07 - 1.27) | 1.28*10 <sup>-02</sup> | 1.05 (1.01 - 1.10) |
| rs2272874 | 6   | 29804224      | AL669813.6-201,<br>HLA-F,<br>AL669813.6-202,<br>AL844851.4-202,<br>AL844851.4-203,<br>AL645939.6-204,<br>HCG4P11,<br>AL844851.4-207,<br>AL669813.6-207 | C/T                 | 0.1144         | 8.07*10 <sup>-04</sup> | 1.23 (1.09 - 1.39) | 1.17*10 <sup>-01</sup> | 1.05 (0.99 - 1.12) |

| SNP        | Chr | Position (bp) | Gene                                                              | Risk/NonRisk Allele | Risk frequency | GWA                    |                    | Pooled analysis        |                    |
|------------|-----|---------------|-------------------------------------------------------------------|---------------------|----------------|------------------------|--------------------|------------------------|--------------------|
|            |     |               |                                                                   |                     |                | P Value                | OR (95% CI)        | P Value                | OR (95% CI)        |
| rs521977   | 6   | 31944806      | SLC44A4,<br>AL662834.8-207,<br>AL844853.23-210<br>AL662834.8-205, | G/T                 | 0.7466         | 6.97*10 <sup>-04</sup> | 1.17 (1.06 - 1.28) | 1.65*10 <sup>-02</sup> | 1.08 (1.01 - 1.15) |
| rs486416   | 6   | 31964049      | HLA-DRB5,<br>EHMT2,<br>AL844853.23-209                            | A/G                 | 0.7078         | 2.73*10 <sup>-04</sup> | 1.17 (1.07 - 1.28) | 1.21*10 <sup>-03</sup> | 1.08 (1.03 - 1.12) |
| rs3115572  | 6   | 32328462      | HLA-DRB5                                                          | G/C                 | 0.6442         | 9.46*10 <sup>-04</sup> | 1.13 (1.03 - 1.22) | 3.08*10 <sup>-01</sup> | 1.02 (0.98 - 1.06) |
| rs9366917  | 6   | 36898644      | CPNE5                                                             | G/A                 | 0.7541         | 1.53*10 <sup>-04</sup> | 1.2 (1.09 - 1.32)  | 7.74*10 <sup>-01</sup> | 1.01 (0.96 - 1.05) |
| rs4302661  | 6   | 39672207      | KIF6                                                              | C/T                 | 0.8226         | 6.57*10 <sup>-04</sup> | 1.2 (1.08 - 1.33)  | 1.22*10 <sup>-02</sup> | 1.07 (1.01 - 1.12) |
| rs10948714 | 6   | 52637625      | RP1-152L7.5                                                       | A/C                 | 0.7974         | 6.23*10 <sup>-04</sup> | 1.2 (1.08 - 1.32)  | 2.64*10 <sup>-02</sup> | 1.05 (1.01 - 1.10) |
| rs16879841 | 6   | 64677764      | intergenic                                                        | A/G                 | 0.2647         | 2.81*10 <sup>-04</sup> | 1.18 (1.08 - 1.29) | 3.28*10 <sup>-02</sup> | 1.05 (1.00 - 1.10) |
| rs4535528  | 6   | 64681158      | intergenic                                                        | T/C                 | 0.2625         | 3.01*10 <sup>-04</sup> | 1.18 (1.08 - 1.29) | 3.84*10 <sup>-02</sup> | 1.05 (1.00 - 1.09) |
| rs397228   | 6   | 64684551      | intergenic                                                        | C/T                 | 0.2629         | 3.64*10 <sup>-04</sup> | 1.17 (1.07 - 1.28) | 3.96*10 <sup>-02</sup> | 1.05 (1.00 - 1.09) |
| rs7757616  | 6   | 64712492      | intergenic                                                        | A/C                 | 0.2965         | 1.52*10 <sup>-04</sup> | 1.16 (1.07 - 1.27) | 1.08*10 <sup>-01</sup> | 1.03 (0.99 - 1.07) |
| rs7753314  | 6   | 64716611      | intergenic                                                        | T/G                 | 0.3092         | 1.89*10 <sup>-04</sup> | 1.16 (1.06 - 1.26) | 1.48*10 <sup>-01</sup> | 1.03 (0.99 - 1.08) |
| rs3806095  | 6   | 71044697      | COL9A1                                                            | A/G                 | 0.3112         | 8.70*10 <sup>-04</sup> | 1.16 (1.06 - 1.26) | 4.89*10 <sup>-01</sup> | 1.02 (0.97 - 1.06) |
| rs12207159 | 6   | 76609496      | MYO6                                                              | T/C                 | 0.0359         | 7.98*10 <sup>-05</sup> | 1.52 (1.23 - 1.87) | 2.27*10 <sup>-01</sup> | 1.06 (0.96 - 1.17) |
| rs10943829 | 6   | 82456630      | intergenic                                                        | A/G                 | 0.4882         | 1.06*10 <sup>-04</sup> | 1.17 (1.08 - 1.27) | 6.78*10 <sup>-01</sup> | 1.01 (0.97 - 1.05) |
| rs194877   | 6   | 82463596      | intergenic                                                        | C/T                 | 0.5042         | 6.43*10 <sup>-05</sup> | 1.18 (1.09 - 1.28) | 1.33*10 <sup>-02</sup> | 1.05 (1.01 - 1.10) |
| rs915125   | 6   | 82520095      | FAM46A                                                            | T/C                 | 0.2944         | 6.39*10 <sup>-04</sup> | 1.17 (1.07 - 1.28) | 3.28*10 <sup>-02</sup> | 1.05 (1.00 - 1.10) |
| rs9361858  | 6   | 82520935      | FAM46A                                                            | G/T                 | 0.4310         | 1.07*10 <sup>-05</sup> | 1.2 (1.1 - 1.3)    | 1.33*10 <sup>-03</sup> | 1.06 (1.02 - 1.10) |
| rs1034241  | 6   | 82530672      | SNORA70,<br>RP5-991C6.2                                           | T/A                 | 0.9120         | 8.43*10 <sup>-04</sup> | 1.26 (1.09 - 1.46) | 1.68*10 <sup>-04</sup> | 1.14 (1.06 - 1.21) |
| rs16893523 | 6   | 82560898      | intergenic                                                        | G/A                 | 0.9113         | 2.99*10 <sup>-04</sup> | 1.31 (1.13 - 1.51) | 1.54*10 <sup>-05</sup> | 1.15 (1.08 - 1.23) |
| rs16893526 | 6   | 82572034      | intergenic                                                        | G/A                 | 0.9123         | 8.71*10 <sup>-04</sup> | 1.26 (1.09 - 1.46) | 9.21*10 <sup>-05</sup> | 1.14 (1.07 - 1.22) |
| rs9344225  | 6   | 82581262      | intergenic                                                        | G/C                 | 0.8567         | 3.55*10 <sup>-04</sup> | 1.21 (1.08 - 1.36) | 1.36*10 <sup>-01</sup> | 1.04 (0.99 - 1.10) |
| rs13197670 | 6   | 82626603      | intergenic                                                        | G/C                 | 0.9223         | 1.98*10 <sup>-04</sup> | 1.31 (1.12 - 1.52) | 1.54*10 <sup>-06</sup> | 1.19 (1.11 - 1.27) |
| rs592728   | 6   | 87477371      | intergenic                                                        | T/C                 | 0.9031         | 7.30*10 <sup>-04</sup> | 1.27 (1.1 - 1.46)  | 4.15*10 <sup>-03</sup> | 1.10 (1.03 - 1.17) |
| rs13194247 | 6   | 92743791      | intergenic                                                        | G/A                 | 0.2228         | 1.46*10 <sup>-04</sup> | 1.2 (1.09 - 1.33)  | 1.89*10 <sup>-02</sup> | 1.05 (1.01 - 1.10) |
| rs9377366  | 6   | 102998331     | intergenic                                                        | G/A                 | 0.4009         | 2.77*10 <sup>-04</sup> | 1.17 (1.07 - 1.27) | 2.67*10 <sup>-01</sup> | 1.02 (0.98 - 1.06) |
| rs9404214  | 6   | 103080821     | intergenic                                                        | G/A                 | 0.3931         | 7.07*10 <sup>-04</sup> | 1.15 (1.06 - 1.25) | 5.53*10 <sup>-01</sup> | 1.01 (0.97 - 1.05) |
| rs571060   | 6   | 112403213     | intergenic                                                        | T/C                 | 0.9688         | 7.44*10 <sup>-04</sup> | 1.52 (1.19 - 1.95) | 2.13*10 <sup>-03</sup> | 1.19 (1.07 - 1.33) |
| rs9385199  | 6   | 121879013     | intergenic                                                        | A/G                 | 0.4272         | 3.65*10 <sup>-04</sup> | 1.16 (1.07 - 1.26) | 9.21*10 <sup>-02</sup> | 1.03 (0.99 - 1.08) |
| rs2040424  | 6   | 122166793     | intergenic                                                        | T/C                 | 0.2296         | 2.79*10 <sup>-04</sup> | 1.19 (1.08 - 1.31) | 1.74*10 <sup>-02</sup> | 1.06 (1.01 - 1.10) |

| SNP        | Chr | Position (bp) | Gene        | Risk/NonRisk Allele | Risk frequency | GWA                    |                    | Pooled analysis        |                    |
|------------|-----|---------------|-------------|---------------------|----------------|------------------------|--------------------|------------------------|--------------------|
|            |     |               |             |                     |                | P Value                | OR (95% CI)        | P Value                | OR (95% CI)        |
| rs10457626 | 6   | 134814920     | intergenic  | T/C                 | 0.4928         | 8.12*10 <sup>-04</sup> | 1.15 (1.06 - 1.24) | 7.00*10 <sup>-03</sup> | 1.05 (1.01 - 1.09) |
| rs12526230 | 6   | 137752459     | intergenic  | G/A                 | 0.8161         | 4.82*10 <sup>-04</sup> | 1.21 (1.09 - 1.34) | 1.10*10 <sup>-01</sup> | 1.04 (0.99 - 1.09) |
| rs17077870 | 6   | 148369321     | intergenic  | G/C                 | 0.2166         | 3.84*10 <sup>-04</sup> | 1.19 (1.08 - 1.32) | 5.27*10 <sup>-03</sup> | 1.07 (1.02 - 1.12) |
| rs6938902  | 6   | 148369869     | intergenic  | T/C                 | 0.2162         | 3.30*10 <sup>-04</sup> | 1.2 (1.09 - 1.32)  | 6.04*10 <sup>-03</sup> | 1.07 (1.02 - 1.12) |
| rs1404485  | 6   | 148370023     | intergenic  | T/G                 | 0.2153         | 1.93*10 <sup>-04</sup> | 1.2 (1.09 - 1.33)  | 9.21*10 <sup>-03</sup> | 1.07 (1.02 - 1.12) |
| rs1404484  | 6   | 148370060     | intergenic  | T/C                 | 0.2164         | 2.77*10 <sup>-04</sup> | 1.2 (1.09 - 1.32)  | 5.09*10 <sup>-03</sup> | 1.07 (1.02 - 1.13) |
| rs9399630  | 6   | 148379354     | intergenic  | C/G                 | 0.2141         | 2.13*10 <sup>-04</sup> | 1.2 (1.09 - 1.33)  | 3.37*10 <sup>-03</sup> | 1.08 (1.02 - 1.13) |
| rs7765812  | 6   | 148380733     | intergenic  | A/G                 | 0.3378         | 6.22*10 <sup>-04</sup> | 1.16 (1.06 - 1.26) | 1.20*10 <sup>-01</sup> | 1.03 (0.99 - 1.08) |
| rs9383934  | 6   | 151963030     | C6orf97     | T/A                 | 0.1884         | 9.81*10 <sup>-04</sup> | 1.18 (1.07 - 1.31) | 4.76*10 <sup>-01</sup> | 1.02 (0.97 - 1.07) |
| rs9383935  | 6   | 151981541     | C6orf97, U6 | T/C                 | 0.0799         | 3.40*10 <sup>-04</sup> | 1.31 (1.13 - 1.51) | 3.36*10 <sup>-01</sup> | 1.03 (0.97 - 1.11) |
| rs12665607 | 6   | 151988322     | C6orf97     | A/T                 | 0.0817         | 2.05*10 <sup>-04</sup> | 1.31 (1.14 - 1.52) | 2.56*10 <sup>-01</sup> | 1.04 (0.97 - 1.11) |
| rs9397436  | 6   | 151993695     | intergenic  | G/A                 | 0.0725         | 3.46*10 <sup>-04</sup> | 1.32 (1.13 - 1.53) | 2.11*10 <sup>-01</sup> | 1.05 (0.97 - 1.14) |
| rs294917   | 6   | 159547065     | FNDC1       | T/C                 | 0.2359         | 7.56*10 <sup>-04</sup> | 1.17 (1.07 - 1.29) | 4.58*10 <sup>-05</sup> | 1.11 (1.05 - 1.16) |
| rs444245   | 6   | 159562951     | FNDC1       | T/C                 | 0.2357         | 4.40*10 <sup>-04</sup> | 1.18 (1.07 - 1.29) | 6.97*10 <sup>-05</sup> | 1.14 (1.07 - 1.22) |
| rs2782552  | 6   | 159563684     | FNDC1       | A/C                 | 0.2393         | 2.25*10 <sup>-04</sup> | 1.18 (1.07 - 1.29) | 3.25*10 <sup>-05</sup> | 1.11 (1.06 - 1.16) |
| rs365302   | 6   | 159566321     | FNDC1       | C/T                 | 0.2393         | 3.72*10 <sup>-04</sup> | 1.17 (1.07 - 1.29) | 3.24*10 <sup>-05</sup> | 1.11 (1.06 - 1.16) |
| rs12193425 | 6   | 170614147     | intergenic  | G/A                 | 0.8436         | 4.33*10 <sup>-04</sup> | 1.22 (1.09 - 1.37) | 8.32*10 <sup>-03</sup> | 1.07 (1.02 - 1.13) |
| rs7792601  | 7   | 4350550       | intergenic  | T/C                 | 0.7623         | 3.90*10 <sup>-04</sup> | 1.19 (1.08 - 1.3)  | 2.97*10 <sup>-01</sup> | 1.02 (0.98 - 1.07) |
| rs12668791 | 7   | 4352868       | intergenic  | T/C                 | 0.1060         | 4.60*10 <sup>-04</sup> | 1.24 (1.09 - 1.41) | 8.15*10 <sup>-01</sup> | 1.01 (0.94 - 1.09) |
| rs2097903  | 7   | 10648934      | intergenic  | T/A                 | 0.5048         | 2.69*10 <sup>-04</sup> | 1.16 (1.07 - 1.26) | 2.89*10 <sup>-02</sup> | 1.04 (1.00 - 1.08) |
| rs2079389  | 7   | 10649158      | intergenic  | T/C                 | 0.5048         | 2.68*10 <sup>-04</sup> | 1.16 (1.07 - 1.26) | 3.04*10 <sup>-02</sup> | 1.04 (1.00 - 1.08) |
| rs17526402 | 7   | 10649450      | intergenic  | A/C                 | 0.5046         | 3.07*10 <sup>-04</sup> | 1.16 (1.07 - 1.25) | 3.10*10 <sup>-02</sup> | 1.04 (1.00 - 1.08) |
| rs2059448  | 7   | 23921770      | intergenic  | T/C                 | 0.7529         | 6.62*10 <sup>-04</sup> | 1.18 (1.07 - 1.29) | 1.40*10 <sup>-01</sup> | 1.04 (0.99 - 1.09) |
| rs10252043 | 7   | 23927625      | intergenic  | G/A                 | 0.6189         | 1.12*10 <sup>-04</sup> | 1.18 (1.08 - 1.28) | 9.73*10 <sup>-01</sup> | 1.00 (0.96 - 1.04) |
| rs774257   | 7   | 26943717      | intergenic  | G/A                 | 0.8755         | 5.66*10 <sup>-05</sup> | 1.26 (1.11 - 1.43) | 1.74*10 <sup>-01</sup> | 1.04 (0.98 - 1.10) |
| rs13243958 | 7   | 33979703      | BMPER       | T/G                 | 0.6432         | 3.25*10 <sup>-04</sup> | 1.16 (1.06 - 1.26) | 1.21*10 <sup>-01</sup> | 1.03 (0.99 - 1.07) |
| rs7791331  | 7   | 37521323      | intergenic  | G/A                 | 0.3552         | 4.92*10 <sup>-04</sup> | 1.16 (1.07 - 1.26) | 5.78*10 <sup>-01</sup> | 1.01 (0.97 - 1.05) |
| rs2598098  | 7   | 37946977      | EPDR1       | A/T                 | 0.6642         | 8.16*10 <sup>-05</sup> | 1.19 (1.09 - 1.29) | 3.45*10 <sup>-02</sup> | 1.07 (1.00 - 1.13) |
| rs6974655  | 7   | 42141121      | GLI3        | T/G                 | 0.2625         | 1.85*10 <sup>-04</sup> | 1.19 (1.09 - 1.3)  | 3.11*10 <sup>-01</sup> | 1.02 (0.98 - 1.07) |
| rs13231378 | 7   | 47049803      | intergenic  | C/T                 | 0.1152         | 4.48*10 <sup>-04</sup> | 1.24 (1.1 - 1.41)  | 6.68*10 <sup>-01</sup> | 1.01 (0.96 - 1.07) |
| rs10240369 | 7   | 51675610      | intergenic  | T/C                 | 0.0438         | 1.76*10 <sup>-04</sup> | 1.41 (1.17 - 1.7)  | 1.03*10 <sup>-01</sup> | 1.08 (0.98 - 1.19) |
| rs10234700 | 7   | 51684178      | intergenic  | A/C                 | 0.0441         | 6.96*10 <sup>-05</sup> | 1.42 (1.18 - 1.72) | 2.07*10 <sup>-01</sup> | 1.06 (0.97 - 1.16) |
| rs4718795  | 7   | 67739216      | intergenic  | C/A                 | 0.9272         | 3.97*10 <sup>-04</sup> | 1.32 (1.12 - 1.55) | 2.66*10 <sup>-03</sup> | 1.12 (1.04 - 1.21) |
| rs798334   | 7   | 77749883      | MAGI2       | A/G                 | 0.8533         | 1.00*10 <sup>-04</sup> | 1.26 (1.12 - 1.41) | 2.76*10 <sup>-01</sup> | 1.03 (0.97 - 1.09) |

| SNP        | Chr | Position (bp) | Gene       | Risk/NonRisk Allele | Risk frequency | GWA                    |                    | Pooled analysis        |                    |
|------------|-----|---------------|------------|---------------------|----------------|------------------------|--------------------|------------------------|--------------------|
|            |     |               |            |                     |                | P Value                | OR (95% CI)        | P Value                | OR (95% CI)        |
| rs11974883 | 7   | 77906460      | MAGI2      | G/A                 | 0.0244         | 7.17*10 <sup>-04</sup> | 1.54 (1.2 - 1.98)  | 1.79*10 <sup>-01</sup> | 1.08 (0.96 - 1.22) |
| rs12532467 | 7   | 78722789      | MAGI2      | A/G                 | 0.3381         | 7.29*10 <sup>-04</sup> | 1.16 (1.06 - 1.26) | 3.20*10 <sup>-01</sup> | 1.02 (0.98 - 1.07) |
| rs10225262 | 7   | 78725861      | MAGI2      | A/C                 | 0.3313         | 7.08*10 <sup>-04</sup> | 1.16 (1.06 - 1.26) | 3.16*10 <sup>-01</sup> | 1.02 (0.98 - 1.07) |
| rs6952164  | 7   | 78728534      | MAGI2      | G/A                 | 0.3386         | 6.53*10 <sup>-04</sup> | 1.16 (1.06 - 1.26) | 2.24*10 <sup>-01</sup> | 1.03 (0.98 - 1.07) |
| rs1528269  | 7   | 78749568      | MAGI2      | A/G                 | 0.3355         | 3.86*10 <sup>-04</sup> | 1.16 (1.07 - 1.27) | 2.69*10 <sup>-01</sup> | 1.02 (0.98 - 1.06) |
| rs8180764  | 7   | 82172260      | intergenic | A/G                 | 0.9621         | 1.39*10 <sup>-04</sup> | 1.5 (1.2 - 1.87)   | 9.02*10 <sup>-01</sup> | 1.01 (0.91 - 1.11) |
| rs17156589 | 7   | 82176234      | intergenic | C/A                 | 0.9639         | 3.64*10 <sup>-04</sup> | 1.51 (1.2 - 1.89)  | 9.53*10 <sup>-01</sup> | 1.00 (0.91 - 1.10) |
| rs10238984 | 7   | 82178197      | intergenic | C/T                 | 0.9637         | 6.32*10 <sup>-04</sup> | 1.48 (1.18 - 1.86) | 8.90*10 <sup>-03</sup> | 1.21 (1.05 - 1.41) |
| rs10250565 | 7   | 82208757      | intergenic | G/A                 | 0.9782         | 5.12*10 <sup>-04</sup> | 1.64 (1.22 - 2.2)  | 2.83*10 <sup>-01</sup> | 1.07 (0.94 - 1.23) |
| rs17647248 | 7   | 84582758      | SEMA3D     | T/A                 | 0.4930         | 2.76*10 <sup>-04</sup> | 1.16 (1.07 - 1.26) | 3.71*10 <sup>-01</sup> | 1.02 (0.98 - 1.06) |
| rs764077   | 7   | 84602330      | intergenic | A/G                 | 0.5009         | 1.23*10 <sup>-04</sup> | 1.17 (1.08 - 1.27) | 4.18*10 <sup>-01</sup> | 1.02 (0.98 - 1.05) |
| rs7779590  | 7   | 85937617      | intergenic | A/G                 | 0.6707         | 6.40*10 <sup>-04</sup> | 1.16 (1.07 - 1.27) | 3.98*10 <sup>-02</sup> | 1.06 (1.00 - 1.13) |
| rs12537221 | 7   | 85938945      | intergenic | C/T                 | 0.3160         | 2.14*10 <sup>-04</sup> | 1.18 (1.08 - 1.29) | 1.23*10 <sup>-01</sup> | 1.05 (0.99 - 1.11) |
| rs10952882 | 7   | 85942672      | intergenic | G/A                 | 0.5396         | 5.33*10 <sup>-04</sup> | 1.15 (1.06 - 1.25) | 3.84*10 <sup>-01</sup> | 1.02 (0.98 - 1.06) |
| rs17161604 | 7   | 98620286      | AC073468.9 | T/G                 | 0.0686         | 2.57*10 <sup>-04</sup> | 1.34 (1.15 - 1.57) | 6.02*10 <sup>-01</sup> | 1.02 (0.95 - 1.10) |
| rs12706029 | 7   | 114776192     | intergenic | G/A                 | 0.9388         | 8.23*10 <sup>-04</sup> | 1.34 (1.13 - 1.59) | 2.51*10 <sup>-01</sup> | 1.05 (0.97 - 1.13) |
| rs17228457 | 7   | 114819130     | intergenic | C/T                 | 0.9402         | 6.75*10 <sup>-04</sup> | 1.35 (1.14 - 1.61) | 2.59*10 <sup>-01</sup> | 1.04 (0.97 - 1.13) |
| rs1527741  | 7   | 114837951     | intergenic | T/C                 | 0.9386         | 8.93*10 <sup>-04</sup> | 1.34 (1.13 - 1.59) | 2.17*10 <sup>-01</sup> | 1.05 (0.97 - 1.13) |
| rs4645504  | 7   | 114874869     | intergenic | C/T                 | 0.9403         | 3.76*10 <sup>-04</sup> | 1.37 (1.15 - 1.64) | 5.89*10 <sup>-01</sup> | 1.02 (0.94 - 1.11) |
| rs17138675 | 7   | 115842764     | intergenic | C/T                 | 0.8938         | 3.04*10 <sup>-04</sup> | 1.28 (1.12 - 1.46) | 2.08*10 <sup>-02</sup> | 1.12 (1.02 - 1.23) |
| rs11980527 | 7   | 130364161     | intergenic | T/C                 | 0.0392         | 2.29*10 <sup>-04</sup> | 1.46 (1.19 - 1.78) | 6.68*10 <sup>-01</sup> | 1.02 (0.92 - 1.14) |
| rs6951855  | 7   | 130375036     | intergenic | A/T                 | 0.0397         | 1.17*10 <sup>-04</sup> | 1.48 (1.21 - 1.81) | 2.93*10 <sup>-01</sup> | 1.07 (0.95 - 1.20) |
| rs6973492  | 7   | 130375154     | intergenic | G/C                 | 0.0396         | 1.99*10 <sup>-04</sup> | 1.46 (1.2 - 1.78)  | 3.49*10 <sup>-01</sup> | 1.06 (0.94 - 1.19) |
| rs1514055  | 7   | 131329830     | intergenic | C/A                 | 0.0622         | 3.39*10 <sup>-04</sup> | 1.32 (1.12 - 1.55) | 1.58*10 <sup>-01</sup> | 1.07 (0.97 - 1.17) |
| rs17161447 | 7   | 139590942     | U1         | C/A                 | 0.8918         | 3.23*10 <sup>-06</sup> | 1.33 (1.16 - 1.52) | 6.12*10 <sup>-04</sup> | 1.12 (1.05 - 1.19) |
| rs6464620  | 7   | 139592008     | U1         | G/A                 | 0.9072         | 9.17*10 <sup>-05</sup> | 1.27 (1.1 - 1.47)  | 2.31*10 <sup>-01</sup> | 1.04 (0.97 - 1.11) |
| rs6950043  | 7   | 142270823     | EPHB6      | C/G                 | 0.0279         | 9.91*10 <sup>-04</sup> | 1.38 (1.09 - 1.74) | 1.88*10 <sup>-02</sup> | 1.14 (1.02 - 1.28) |
| rs4987612  | 7   | 142291790     | TRPV6      | C/T                 | 0.0281         | 9.37*10 <sup>-04</sup> | 1.38 (1.09 - 1.74) | 1.99*10 <sup>-02</sup> | 1.14 (1.02 - 1.28) |
| rs1676904  | 7   | 148287213     | Y_RNA      | G/A                 | 0.1553         | 9.56*10 <sup>-04</sup> | 1.2 (1.08 - 1.33)  | 5.24*10 <sup>-02</sup> | 1.07 (1.00 - 1.15) |
| rs7801616  | 7   | 151083561     | PRKAG2     | T/C                 | 0.4649         | 8.70*10 <sup>-04</sup> | 1.14 (1.06 - 1.24) | 1.43*10 <sup>-01</sup> | 1.03 (0.99 - 1.07) |
| rs749120   | 7   | 154038740     | DPP6       | T/G                 | 0.4216         | 1.20*10 <sup>-04</sup> | 1.17 (1.08 - 1.27) | 2.51*10 <sup>-02</sup> | 1.04 (1.01 - 1.08) |
| rs10246702 | 7   | 154597467     | intergenic | G/A                 | 0.0849         | 7.38*10 <sup>-04</sup> | 1.28 (1.11 - 1.48) | 8.66*10 <sup>-03</sup> | 1.10 (1.02 - 1.18) |
| rs10263087 | 7   | 154601402     | 7SK        | G/C                 | 0.0839         | 5.96*10 <sup>-04</sup> | 1.29 (1.12 - 1.49) | 9.15*10 <sup>-03</sup> | 1.10 (1.02 - 1.18) |
| rs7798373  | 7   | 156951420     | intergenic | C/T                 | 0.8594         | 1.26*10 <sup>-04</sup> | 1.26 (1.12 - 1.41) | 6.07*10 <sup>-03</sup> | 1.08 (1.02 - 1.14) |
| rs4716745  | 7   | 156954036     | intergenic | T/C                 | 0.8700         | 6.06*10 <sup>-04</sup> | 1.23 (1.09 - 1.39) | 2.46*10 <sup>-02</sup> | 1.10 (1.01 - 1.19) |

| SNP        | Chr | Position (bp) | Gene        | Risk/NonRisk Allele | Risk frequency | GWA                    |                    | Pooled analysis        |                    |
|------------|-----|---------------|-------------|---------------------|----------------|------------------------|--------------------|------------------------|--------------------|
|            |     |               |             |                     |                | P Value                | OR (95% CI)        | P Value                | OR (95% CI)        |
| rs7785035  | 7   | 156956293     | intergenic  | T/C                 | 0.8427         | 5.62*10 <sup>-04</sup> | 1.21 (1.09 - 1.36) | 1.65*10 <sup>-01</sup> | 1.05 (0.98 - 1.14) |
| rs1806612  | 7   | 157679219     | PTPRN2      | C/T                 | 0.3845         | 8.25*10 <sup>-05</sup> | 1.18 (1.08 - 1.28) | 5.25*10 <sup>-02</sup> | 1.06 (1.00 - 1.12) |
| rs12546771 | 8   | 287118        | intergenic  | T/C                 | 0.0631         | 7.21*10 <sup>-04</sup> | 1.31 (1.12 - 1.53) | 1.42*10 <sup>-01</sup> | 1.06 (0.98 - 1.15) |
| rs6980727  | 8   | 4961603       | intergenic  | C/T                 | 0.5503         | 4.00*10 <sup>-04</sup> | 1.16 (1.07 - 1.25) | 3.35*10 <sup>-02</sup> | 1.04 (1.00 - 1.08) |
| rs7841137  | 8   | 15589523      | TUSC3       | T/C                 | 0.5173         | 1.28*10 <sup>-04</sup> | 1.16 (1.07 - 1.26) | 4.91*10 <sup>-01</sup> | 1.01 (0.98 - 1.05) |
| rs1362865  | 8   | 15591821      | TUSC3       | T/C                 | 0.5264         | 2.99*10 <sup>-04</sup> | 1.15 (1.06 - 1.25) | 2.55*10 <sup>-02</sup> | 1.07 (1.01 - 1.13) |
| rs7834392  | 8   | 26951349      | intergenic  | T/C                 | 0.1279         | 6.94*10 <sup>-04</sup> | 1.23 (1.09 - 1.38) | 2.21*10 <sup>-01</sup> | 1.04 (0.98 - 1.11) |
| rs3943670  | 8   | 33599038      | intergenic  | T/C                 | 0.5434         | 6.86*10 <sup>-04</sup> | 1.15 (1.06 - 1.24) | 1.30*10 <sup>-01</sup> | 1.03 (0.99 - 1.07) |
| rs4733161  | 8   | 33617193      | AC013603.17 | C/T                 | 0.5836         | 8.91*10 <sup>-04</sup> | 1.15 (1.06 - 1.24) | 4.14*10 <sup>-01</sup> | 1.02 (0.98 - 1.06) |
| rs1838041  | 8   | 33644324      | intergenic  | C/T                 | 0.6117         | 2.52*10 <sup>-04</sup> | 1.17 (1.07 - 1.27) | 1.74*10 <sup>-02</sup> | 1.07 (1.01 - 1.14) |
| rs1530345  | 8   | 33651668      | intergenic  | G/C                 | 0.6153         | 6.07*10 <sup>-04</sup> | 1.15 (1.06 - 1.25) | 4.01*10 <sup>-01</sup> | 1.02 (0.98 - 1.05) |
| rs4733163  | 8   | 33653826      | intergenic  | C/T                 | 0.6154         | 5.74*10 <sup>-04</sup> | 1.15 (1.06 - 1.25) | 3.95*10 <sup>-01</sup> | 1.02 (0.98 - 1.05) |
| rs1026217  | 8   | 35090459      | intergenic  | A/G                 | 0.3613         | 9.96*10 <sup>-04</sup> | 1.15 (1.06 - 1.25) | 9.97*10 <sup>-01</sup> | 1.00 (0.96 - 1.04) |
| rs1451355  | 8   | 35123428      | intergenic  | A/G                 | 0.3382         | 1.51*10 <sup>-04</sup> | 1.17 (1.07 - 1.27) | 4.41*10 <sup>-01</sup> | 1.02 (0.98 - 1.06) |
| rs10958811 | 8   | 38891319      | PLEKHA2     | A/C                 | 0.1843         | 8.38*10 <sup>-04</sup> | 1.19 (1.07 - 1.31) | 6.47*10 <sup>-01</sup> | 1.01 (0.96 - 1.07) |
| rs6989571  | 8   | 40105536      | intergenic  | T/G                 | 0.6158         | 3.08*10 <sup>-05</sup> | 1.2 (1.1 - 1.3)    | 6.31*10 <sup>-02</sup> | 1.05 (1.00 - 1.10) |
| rs3906806  | 8   | 53538312      | intergenic  | A/G                 | 0.4256         | 9.31*10 <sup>-04</sup> | 1.15 (1.06 - 1.24) | 3.39*10 <sup>-01</sup> | 1.02 (0.98 - 1.06) |
| rs10958322 | 8   | 53539789      | intergenic  | T/C                 | 0.4333         | 3.01*10 <sup>-04</sup> | 1.16 (1.07 - 1.26) | 2.02*10 <sup>-01</sup> | 1.03 (0.99 - 1.07) |
| rs12544654 | 8   | 66265324      | intergenic  | T/C                 | 0.7066         | 7.66*10 <sup>-04</sup> | 1.16 (1.06 - 1.27) | 1.44*10 <sup>-01</sup> | 1.03 (0.99 - 1.07) |
| rs16939078 | 8   | 76554139      | HNF4G       | A/T                 | 0.2639         | 4.03*10 <sup>-04</sup> | 1.16 (1.06 - 1.27) | 5.54*10 <sup>-01</sup> | 1.01 (0.97 - 1.06) |
| rs2977942  | 8   | 76628378      | HNF4G       | G/T                 | 0.0544         | 3.18*10 <sup>-05</sup> | 1.44 (1.21 - 1.71) | 5.40*10 <sup>-01</sup> | 1.03 (0.95 - 1.11) |
| rs2922778  | 8   | 76664902      | intergenic  | T/C                 | 0.1216         | 3.83*10 <sup>-04</sup> | 1.24 (1.1 - 1.4)   | 1.73*10 <sup>-02</sup> | 1.09 (1.01 - 1.17) |
| rs7818923  | 8   | 76705115      | intergenic  | T/C                 | 0.1213         | 4.22*10 <sup>-04</sup> | 1.24 (1.1 - 1.4)   | 9.53*10 <sup>-01</sup> | 1.00 (0.94 - 1.07) |
| rs16886892 | 8   | 87202047      | ATP6V0D2    | G/A                 | 0.1336         | 7.04*10 <sup>-04</sup> | 1.22 (1.09 - 1.38) | 6.19*10 <sup>-02</sup> | 1.06 (1.00 - 1.12) |
| rs13282617 | 8   | 90099093      | intergenic  | C/G                 | 0.9306         | 1.72*10 <sup>-04</sup> | 1.36 (1.16 - 1.61) | 9.88*10 <sup>-01</sup> | 1.00 (0.93 - 1.07) |
| rs6994748  | 8   | 97165066      | intergenic  | A/T                 | 0.0658         | 3.67*10 <sup>-04</sup> | 1.33 (1.14 - 1.56) | 6.16*10 <sup>-01</sup> | 1.02 (0.94 - 1.10) |
| rs2704261  | 8   | 97672009      | SDC2        | G/A                 | 0.7671         | 1.35*10 <sup>-04</sup> | 1.18 (1.07 - 1.3)  | 2.50*10 <sup>-01</sup> | 1.03 (0.98 - 1.07) |
| rs2028086  | 8   | 97673354      | SDC2        | G/C                 | 0.7708         | 1.70*10 <sup>-04</sup> | 1.19 (1.08 - 1.31) | 2.85*10 <sup>-01</sup> | 1.02 (0.98 - 1.07) |
| rs2704259  | 8   | 97675483      | SDC2        | G/A                 | 0.7649         | 2.46*10 <sup>-04</sup> | 1.18 (1.07 - 1.3)  | 3.04*10 <sup>-01</sup> | 1.02 (0.98 - 1.07) |
| rs2981220  | 8   | 107902953     | intergenic  | T/C                 | 0.9254         | 8.17*10 <sup>-04</sup> | 1.31 (1.12 - 1.54) | 8.52*10 <sup>-02</sup> | 1.07 (0.99 - 1.15) |
| rs2981218  | 8   | 107904720     | intergenic  | T/G                 | 0.9258         | 7.77*10 <sup>-04</sup> | 1.32 (1.12 - 1.54) | 8.66*10 <sup>-02</sup> | 1.07 (0.99 - 1.15) |
| rs12542215 | 8   | 123571823     | intergenic  | G/C                 | 0.8791         | 7.41*10 <sup>-04</sup> | 1.24 (1.09 - 1.4)  | 3.90*10 <sup>-03</sup> | 1.11 (1.03 - 1.19) |
| rs263239   | 8   | 131934200     | ADCY8       | A/G                 | 0.1712         | 8.13*10 <sup>-04</sup> | 1.2 (1.08 - 1.34)  | 6.72*10 <sup>-03</sup> | 1.11 (1.03 - 1.19) |
| rs2597348  | 8   | 133541123     | KCNQ3       | C/T                 | 0.3152         | 3.23*10 <sup>-04</sup> | 1.17 (1.07 - 1.27) | 1.59*10 <sup>-02</sup> | 1.06 (1.01 - 1.11) |
| rs2403775  | 8   | 133541544     | KCNQ3       | A/G                 | 0.3145         | 3.36*10 <sup>-04</sup> | 1.17 (1.07 - 1.27) | 3.97*10 <sup>-01</sup> | 1.02 (0.98 - 1.06) |



| SNP        | Chr | Position (bp) | Gene                         | Risk/NonRisk Allele | Risk frequency | GWA                    |                    | Pooled analysis        |                    |
|------------|-----|---------------|------------------------------|---------------------|----------------|------------------------|--------------------|------------------------|--------------------|
|            |     |               |                              |                     |                | P Value                | OR (95% CI)        | P Value                | OR (95% CI)        |
| rs2673556  | 8   | 133546112     | KCNQ3                        | G/C                 | 0.2864         | 3.80*10 <sup>-04</sup> | 1.17 (1.07 - 1.28) | 4.17*10 <sup>-01</sup> | 1.02 (0.98 - 1.06) |
| rs17617902 | 8   | 137187961     | intergenic                   | A/G                 | 0.3913         | 8.26*10 <sup>-04</sup> | 1.15 (1.06 - 1.25) | 1.53*10 <sup>-01</sup> | 1.03 (0.99 - 1.07) |
| rs3936181  | 8   | 139775446     | COL22A1                      | G/T                 | 0.1789         | 2.86*10 <sup>-04</sup> | 1.2 (1.08 - 1.33)  | 1.01*10 <sup>-01</sup> | 1.04 (0.99 - 1.09) |
| rs13282061 | 8   | 141369559     | TRAPPC9                      | T/C                 | 0.0532         | 3.33*10 <sup>-04</sup> | 1.36 (1.15 - 1.63) | 6.61*10 <sup>-02</sup> | 1.09 (0.99 - 1.20) |
| rs7865812  | 9   | 4160979       | GLIS3                        | A/C                 | 0.4958         | 9.21*10 <sup>-04</sup> | 1.14 (1.06 - 1.24) | 2.17*10 <sup>-01</sup> | 1.03 (0.99 - 1.07) |
| rs4326470  | 9   | 14684536      | ZDHHC21,<br>AL159169.14      | C/A                 | 0.1808         | 2.77*10 <sup>-04</sup> | 1.21 (1.09 - 1.34) | 7.37*10 <sup>-01</sup> | 1.01 (0.96 - 1.06) |
| rs9650683  | 9   | 15447801      | SNAPC3                       | G/C                 | 0.0873         | 6.16*10 <sup>-04</sup> | 1.27 (1.11 - 1.46) | 1.59*10 <sup>-02</sup> | 1.10 (1.02 - 1.18) |
| rs6475535  | 9   | 21440474      | AL353732.14-201              | C/G                 | 0.1391         | 1.49*10 <sup>-04</sup> | 1.25 (1.11 - 1.4)  | 1.49*10 <sup>-03</sup> | 1.14 (1.05 - 1.23) |
| rs1889680  | 9   | 21685460      | AL355679.20,<br>RP11-473O3.1 | T/C                 | 0.4785         | 2.13*10 <sup>-04</sup> | 1.16 (1.07 - 1.26) | 1.14*10 <sup>-03</sup> | 1.06 (1.02 - 1.10) |
| rs1452658  | 9   | 21690795      | AL355679.20,<br>RP11-473O3.1 | G/A                 | 0.4744         | 2.42*10 <sup>-04</sup> | 1.16 (1.07 - 1.26) | 4.54*10 <sup>-04</sup> | 1.07 (1.03 - 1.11) |
| rs10811584 | 9   | 21691005      | AL355679.20,<br>RP11-473O3.1 | T/G                 | 0.4748         | 3.07*10 <sup>-04</sup> | 1.16 (1.07 - 1.25) | 3.48*10 <sup>-04</sup> | 1.07 (1.03 - 1.11) |
| rs7848524  | 9   | 21691432      | AL355679.20,<br>RP11-473O3.1 | T/C                 | 0.4793         | 7.25*10 <sup>-05</sup> | 1.18 (1.09 - 1.28) | 6.97*10 <sup>-05</sup> | 1.08 (1.04 - 1.12) |
| rs6475552  | 9   | 21691674      | AL355679.20,<br>RP11-473O3.1 | G/A                 | 0.4739         | 4.65*10 <sup>-04</sup> | 1.15 (1.07 - 1.25) | 3.52*10 <sup>-04</sup> | 1.07 (1.03 - 1.11) |
| rs643319   | 9   | 22007836      | MTAP                         | C/A                 | 0.5302         | 7.11*10 <sup>-05</sup> | 1.16 (1.07 - 1.25) | 1.92*10 <sup>-14</sup> | 1.17 (1.13 - 1.22) |
| rs7044859  | 9   | 22008781      | MTAP                         | A/T                 | 0.4586         | 2.03*10 <sup>-05</sup> | 1.17 (1.08 - 1.27) | 7.02*10 <sup>-24</sup> | 1.21 (1.16 - 1.25) |
| rs523096   | 9   | 22009129      | MTAP                         | A/G                 | 0.5653         | 4.05*10 <sup>-05</sup> | 1.18 (1.09 - 1.28) | 5.18*10 <sup>-22</sup> | 1.20 (1.16 - 1.24) |
| rs518394   | 9   | 22009673      | MTAP                         | G/C                 | 0.5677         | 4.43*10 <sup>-05</sup> | 1.18 (1.08 - 1.28) | 1.16*10 <sup>-18</sup> | 1.18 (1.14 - 1.23) |
| rs10757264 | 9   | 22009732      | MTAP                         | G/A                 | 0.4957         | 6.99*10 <sup>-06</sup> | 1.17 (1.08 - 1.27) | 1.82*10 <sup>-19</sup> | 1.18 (1.14 - 1.23) |
| rs10965212 | 9   | 22013795      | MTAP                         | A/T                 | 0.4897         | 1.03*10 <sup>-04</sup> | 1.17 (1.08 - 1.26) | 1.39*10 <sup>-25</sup> | 1.21 (1.17 - 1.26) |
| rs496892   | 9   | 22014351      | MTAP                         | C/T                 | 0.5346         | 1.75*10 <sup>-04</sup> | 1.15 (1.06 - 1.24) | 6.45*10 <sup>-08</sup> | 1.17 (1.10 - 1.23) |
| rs10965215 | 9   | 22019445      | MTAP                         | A/G                 | 0.4862         | 1.85*10 <sup>-04</sup> | 1.16 (1.07 - 1.26) | 1.32*10 <sup>-25</sup> | 1.21 (1.17 - 1.26) |
| rs564398   | 9   | 22019547      | MTAP                         | T/C                 | 0.5948         | 1.82*10 <sup>-04</sup> | 1.17 (1.08 - 1.27) | 1.77*10 <sup>-24</sup> | 1.21 (1.17 - 1.26) |
| rs7865618  | 9   | 22021005      | MTAP                         | A/G                 | 0.5854         | 6.25*10 <sup>-05</sup> | 1.18 (1.09 - 1.28) | 3.94*10 <sup>-25</sup> | 1.22 (1.17 - 1.26) |
| rs10965219 | 9   | 22043687      | intergenic                   | G/A                 | 0.4966         | 2.36*10 <sup>-05</sup> | 1.18 (1.09 - 1.27) | 2.02*10 <sup>-25</sup> | 1.23 (1.18 - 1.27) |
| rs10120688 | 9   | 22046499      | intergenic                   | A/G                 | 0.4951         | 7.24*10 <sup>-05</sup> | 1.16 (1.07 - 1.26) | 1.57*10 <sup>-25</sup> | 1.23 (1.18 - 1.27) |
| rs8181047  | 9   | 22054465      | intergenic                   | G/A                 | 0.6913         | 6.18*10 <sup>-04</sup> | 1.16 (1.06 - 1.27) | 4.79*10 <sup>-12</sup> | 1.18 (1.13 - 1.24) |
| rs10757270 | 9   | 22062719      | intergenic                   | G/A                 | 0.4428         | 4.52*10 <sup>-05</sup> | 1.16 (1.07 - 1.25) | 2.30*10 <sup>-13</sup> | 1.23 (1.17 - 1.30) |
| rs6475606  | 9   | 22071850      | intergenic                   | T/C                 | 0.4947         | 9.49*10 <sup>-07</sup> | 1.21 (1.12 - 1.31) | 1.23*10 <sup>-43</sup> | 1.29 (1.25 - 1.34) |
| rs10757272 | 9   | 22078260      | intergenic                   | T/C                 | 0.4955         | 4.56*10 <sup>-06</sup> | 1.19 (1.1 - 1.29)  | 1.68*10 <sup>-43</sup> | 1.29 (1.25 - 1.34) |

| SNP        | Chr | Position (bp) | Gene       | Risk/NonRisk Allele | Risk frequency | GWA                    |                    | Pooled analysis        |                    |
|------------|-----|---------------|------------|---------------------|----------------|------------------------|--------------------|------------------------|--------------------|
|            |     |               |            |                     |                | P Value                | OR (95% CI)        | P Value                | OR (95% CI)        |
| rs4977574  | 9   | 22088574      | intergenic | G/A                 | 0.4973         | 2.41*10 <sup>-06</sup> | 1.2 (1.1 - 1.3)    | 1.04*10 <sup>-45</sup> | 1.30 (1.26 - 1.35) |
| rs2891168  | 9   | 22088619      | intergenic | G/A                 | 0.4971         | 2.29*10 <sup>-06</sup> | 1.2 (1.1 - 1.3)    | 1.48*10 <sup>-45</sup> | 1.30 (1.26 - 1.35) |
| rs1333042  | 9   | 22093813      | intergenic | G/A                 | 0.5131         | 2.60*10 <sup>-07</sup> | 1.22 (1.12 - 1.32) | 7.30*10 <sup>-40</sup> | 1.30 (1.25 - 1.35) |
| rs1333048  | 9   | 22115347      | intergenic | C/A                 | 0.5058         | 1.08*10 <sup>-06</sup> | 1.2 (1.11 - 1.3)   | 8.78*10 <sup>-44</sup> | 1.30 (1.25 - 1.34) |
| rs1333049  | 9   | 22115503      | intergenic | C/G                 | 0.4858         | 4.28*10 <sup>-07</sup> | 1.22 (1.12 - 1.32) | 1.80*10 <sup>-44</sup> | 1.30 (1.25 - 1.35) |
| rs7871745  | 9   | 23299087      | intergenic | G/C                 | 0.0697         | 5.31*10 <sup>-04</sup> | 1.22 (1.13 - 1.54) | 9.31*10 <sup>-02</sup> | 1.08 (0.99 - 1.19) |
| rs2210292  | 9   | 23351805      | intergenic | A/G                 | 0.1498         | 9.78*10 <sup>-04</sup> | 1.2 (1.08 - 1.34)  | 3.01*10 <sup>-02</sup> | 1.06 (1.01 - 1.13) |
| rs1360380  | 9   | 23368488      | intergenic | G/T                 | 0.4391         | 5.43*10 <sup>-04</sup> | 1.15 (1.06 - 1.25) | 5.23*10 <sup>-04</sup> | 1.10 (1.04 - 1.17) |
| rs1414030  | 9   | 29716239      | intergenic | T/C                 | 0.5198         | 6.83*10 <sup>-04</sup> | 1.15 (1.06 - 1.24) | 6.49*10 <sup>-02</sup> | 1.03 (1.00 - 1.07) |
| rs10813159 | 9   | 29728493      | intergenic | T/A                 | 0.5262         | 2.81*10 <sup>-04</sup> | 1.16 (1.07 - 1.25) | 9.47*10 <sup>-02</sup> | 1.03 (0.99 - 1.07) |
| rs11143665 | 9   | 75506161      | intergenic | G/A                 | 0.5415         | 1.18*10 <sup>-04</sup> | 1.17 (1.08 - 1.27) | 1.11*10 <sup>-01</sup> | 1.03 (0.99 - 1.07) |
| rs11143677 | 9   | 75525136      | intergenic | A/G                 | 0.5443         | 1.80*10 <sup>-04</sup> | 1.16 (1.07 - 1.26) | 4.74*10 <sup>-06</sup> | 1.14 (1.08 - 1.20) |
| rs11143678 | 9   | 75527223      | intergenic | G/T                 | 0.5473         | 1.64*10 <sup>-04</sup> | 1.17 (1.08 - 1.26) | 1.03*10 <sup>-01</sup> | 1.03 (0.99 - 1.07) |
| rs11143679 | 9   | 75527334      | intergenic | T/C                 | 0.5502         | 1.67*10 <sup>-04</sup> | 1.17 (1.08 - 1.26) | 1.92*10 <sup>-01</sup> | 1.02 (0.99 - 1.06) |
| rs11143683 | 9   | 75532226      | intergenic | C/T                 | 0.5476         | 1.21*10 <sup>-04</sup> | 1.17 (1.08 - 1.27) | 1.05*10 <sup>-01</sup> | 1.03 (0.99 - 1.07) |
| rs7029105  | 9   | 75534759      | intergenic | C/T                 | 0.5482         | 1.52*10 <sup>-04</sup> | 1.17 (1.08 - 1.26) | 1.01*10 <sup>-01</sup> | 1.03 (0.99 - 1.07) |
| rs1327827  | 9   | 76444930      | RORB       | C/T                 | 0.9492         | 4.02*10 <sup>-04</sup> | 1.4 (1.16 - 1.69)  | 1.45*10 <sup>-01</sup> | 1.08 (0.98 - 1.19) |
| rs6560438  | 9   | 77086652      | intergenic | C/A                 | 0.1065         | 1.20*10 <sup>-04</sup> | 1.28 (1.13 - 1.46) | 6.87*10 <sup>-02</sup> | 1.05 (1.00 - 1.12) |
| rs12342299 | 9   | 77832048      | PCSK5      | T/C                 | 0.0702         | 1.09*10 <sup>-05</sup> | 1.38 (1.19 - 1.61) | 5.79*10 <sup>-04</sup> | 1.17 (1.07 - 1.27) |
| rs1027384  | 9   | 78122513      | PCSK5      | G/A                 | 0.4665         | 7.36*10 <sup>-05</sup> | 1.16 (1.07 - 1.26) | 3.27*10 <sup>-03</sup> | 1.06 (1.02 - 1.10) |
| rs11144827 | 9   | 78123694      | PCSK5      | G/A                 | 0.1635         | 9.12*10 <sup>-04</sup> | 1.2 (1.08 - 1.33)  | 7.78*10 <sup>-03</sup> | 1.08 (1.02 - 1.14) |
| rs10780688 | 9   | 86636264      | NTRK2      | G/A                 | 0.4750         | 6.06*10 <sup>-04</sup> | 1.15 (1.06 - 1.25) | 1.36*10 <sup>-01</sup> | 1.03 (0.99 - 1.07) |
| rs10868228 | 9   | 86637366      | NTRK2      | G/A                 | 0.4801         | 7.66*10 <sup>-04</sup> | 1.15 (1.06 - 1.25) | 1.24*10 <sup>-01</sup> | 1.03 (0.99 - 1.07) |
| rs10115908 | 9   | 86813205      | NTRK2      | A/G                 | 0.4482         | 3.60*10 <sup>-04</sup> | 1.16 (1.07 - 1.25) | 6.84*10 <sup>-01</sup> | 1.01 (0.97 - 1.04) |
| rs2200968  | 9   | 86841932      | intergenic | C/T                 | 0.3030         | 3.26*10 <sup>-04</sup> | 1.17 (1.07 - 1.27) | 9.97*10 <sup>-01</sup> | 1.00 (0.96 - 1.04) |
| rs3012352  | 9   | 106165626     | intergenic | C/T                 | 0.2850         | 8.26*10 <sup>-04</sup> | 1.16 (1.06 - 1.27) | 6.54*10 <sup>-01</sup> | 1.01 (0.97 - 1.05) |
| rs7865150  | 9   | 106252156     | intergenic | A/G                 | 0.3185         | 4.79*10 <sup>-04</sup> | 1.16 (1.07 - 1.27) | 6.01*10 <sup>-01</sup> | 1.01 (0.97 - 1.06) |
| rs698458   | 9   | 106273931     | intergenic | G/A                 | 0.3020         | 8.77*10 <sup>-04</sup> | 1.16 (1.06 - 1.26) | 5.06*10 <sup>-01</sup> | 1.02 (0.97 - 1.06) |
| rs698459   | 9   | 106273979     | intergenic | G/T                 | 0.3009         | 5.06*10 <sup>-04</sup> | 1.17 (1.07 - 1.27) | 3.11*10 <sup>-01</sup> | 1.02 (0.98 - 1.07) |
| rs698460   | 9   | 106274039     | intergenic | T/C                 | 0.3018         | 6.15*10 <sup>-04</sup> | 1.16 (1.07 - 1.27) | 3.49*10 <sup>-01</sup> | 1.02 (0.98 - 1.06) |
| rs1916675  | 9   | 106286225     | intergenic | G/A                 | 0.3366         | 6.20*10 <sup>-05</sup> | 1.19 (1.09 - 1.29) | 1.36*10 <sup>-01</sup> | 1.03 (0.99 - 1.07) |
| rs7032725  | 9   | 106290026     | intergenic | C/G                 | 0.6750         | 6.43*10 <sup>-04</sup> | 1.16 (1.07 - 1.26) | 6.17*10 <sup>-01</sup> | 1.01 (0.97 - 1.06) |
| rs10820650 | 9   | 106297227     | intergenic | C/T                 | 0.3182         | 5.59*10 <sup>-05</sup> | 1.19 (1.09 - 1.3)  | 2.20*10 <sup>-02</sup> | 1.05 (1.01 - 1.09) |
| rs10820656 | 9   | 106300420     | intergenic | T/C                 | 0.3246         | 1.10*10 <sup>-04</sup> | 1.18 (1.08 - 1.28) | 2.47*10 <sup>-03</sup> | 1.10 (1.03 - 1.16) |
| rs2515616  | 9   | 106721816     | ABCA1      | G/A                 | 0.8017         | 4.61*10 <sup>-05</sup> | 1.22 (1.1 - 1.35)  | 2.07*10 <sup>-02</sup> | 1.06 (1.01 - 1.11) |

| SNP        | Chr | Position (bp) | Gene               | Risk/NonRisk Allele | Risk frequency | GWA                    |                    | Pooled analysis        |                    |
|------------|-----|---------------|--------------------|---------------------|----------------|------------------------|--------------------|------------------------|--------------------|
|            |     |               |                    |                     |                | P Value                | OR (95% CI)        | P Value                | OR (95% CI)        |
| rs9299183  | 9   | 112021093     | intergenic         | C/T                 | 0.4358         | 8.38*10 <sup>-04</sup> | 1.14 (1.06 - 1.24) | 2.11*10 <sup>-03</sup> | 1.06 (1.02 - 1.11) |
| rs4979224  | 9   | 115022099     | FKBP15, SLC31A1    | G/A                 | 0.3030         | 7.80*10 <sup>-04</sup> | 1.16 (1.06 - 1.27) | 4.96*10 <sup>-01</sup> | 1.01 (0.97 - 1.05) |
| rs10981693 | 9   | 115025238     | FKBP15, SLC31A1    | C/T                 | 0.3011         | 6.24*10 <sup>-04</sup> | 1.16 (1.07 - 1.27) | 3.41*10 <sup>-01</sup> | 1.02 (0.98 - 1.06) |
| rs10121565 | 9   | 118865058     | ASTN2              | A/G                 | 0.2544         | 5.39*10 <sup>-04</sup> | 1.17 (1.07 - 1.29) | 7.71*10 <sup>-02</sup> | 1.04 (1.00 - 1.08) |
| rs1329053  | 9   | 119415942     | intergenic         | A/G                 | 0.8023         | 2.71*10 <sup>-04</sup> | 1.21 (1.09 - 1.34) | 2.31*10 <sup>-01</sup> | 1.03 (0.98 - 1.08) |
| rs7046909  | 9   | 122803701     | C5                 | C/T                 | 0.0801         | 2.85*10 <sup>-04</sup> | 1.29 (1.11 - 1.49) | 1.79*10 <sup>-03</sup> | 1.22 (1.08 - 1.38) |
| rs10985712 | 9   | 124379320     | intergenic         | T/C                 | 0.3959         | 9.81*10 <sup>-04</sup> | 1.15 (1.06 - 1.24) | 5.53*10 <sup>-01</sup> | 1.01 (0.97 - 1.05) |
| rs7867785  | 9   | 124380085     | intergenic         | T/C                 | 0.4168         | 9.23*10 <sup>-04</sup> | 1.15 (1.06 - 1.24) | 2.04*10 <sup>-01</sup> | 1.04 (0.98 - 1.10) |
| rs2384794  | 9   | 137472427     | intergenic         | C/T                 | 0.6278         | 9.16*10 <sup>-04</sup> | 1.15 (1.06 - 1.25) | 6.18*10 <sup>-03</sup> | 1.07 (1.02 - 1.12) |
| rs7093049  | 10  | 2583077       | intergenic         | G/A                 | 0.1363         | 5.45*10 <sup>-04</sup> | 1.22 (1.08 - 1.37) | 3.65*10 <sup>-02</sup> | 1.06 (1.00 - 1.13) |
| rs11252934 | 10  | 5124416       | AKR1C3, AL391427.9 | T/C                 | 0.6498         | 3.99*10 <sup>-04</sup> | 1.17 (1.07 - 1.27) | 2.18*10 <sup>-01</sup> | 1.03 (0.98 - 1.08) |
| rs1937843  | 10  | 5126915       | AKR1C3, AL391427.9 | A/G                 | 0.6478         | 5.57*10 <sup>-04</sup> | 1.16 (1.07 - 1.26) | 4.57*10 <sup>-01</sup> | 1.02 (0.97 - 1.06) |
| rs7741     | 10  | 5128607       | AKR1C3, AL391427.9 | G/A                 | 0.6487         | 3.25*10 <sup>-04</sup> | 1.17 (1.07 - 1.27) | 1.56*10 <sup>-01</sup> | 1.03 (0.99 - 1.08) |
| rs1937920  | 10  | 5151955       | RP11-499O7.5       | G/A                 | 0.2420         | 7.67*10 <sup>-04</sup> | 1.17 (1.07 - 1.28) | 8.75*10 <sup>-01</sup> | 1.00 (0.96 - 1.05) |
| rs12776280 | 10  | 5158153       | RP11-499O7.5       | G/A                 | 0.5748         | 4.45*10 <sup>-04</sup> | 1.15 (1.06 - 1.25) | 1.58*10 <sup>-01</sup> | 1.03 (0.99 - 1.07) |
| rs4448597  | 10  | 5164475       | RP11-499O7.5       | A/G                 | 0.6516         | 3.00*10 <sup>-04</sup> | 1.17 (1.07 - 1.27) | 4.38*10 <sup>-01</sup> | 1.02 (0.97 - 1.06) |
| rs1781935  | 10  | 5189934       | AKR1CL1            | C/G                 | 0.4109         | 6.93*10 <sup>-05</sup> | 1.16 (1.07 - 1.26) | 8.64*10 <sup>-01</sup> | 1.00 (0.96 - 1.05) |
| rs11253019 | 10  | 5190076       | AKR1CL1            | A/G                 | 0.6854         | 3.40*10 <sup>-04</sup> | 1.17 (1.07 - 1.28) | 8.37*10 <sup>-01</sup> | 1.00 (0.96 - 1.05) |
| rs1334467  | 10  | 5191219       | AKR1CL1            | G/A                 | 0.6506         | 9.04*10 <sup>-04</sup> | 1.15 (1.06 - 1.26) | 5.32*10 <sup>-01</sup> | 1.01 (0.97 - 1.06) |
| rs4881406  | 10  | 5193296       | AKR1CL1            | A/G                 | 0.6528         | 2.34*10 <sup>-04</sup> | 1.17 (1.08 - 1.28) | 2.78*10 <sup>-01</sup> | 1.02 (0.98 - 1.06) |
| rs11253022 | 10  | 5196049       | AKR1CL1            | C/T                 | 0.6507         | 7.47*10 <sup>-04</sup> | 1.16 (1.06 - 1.26) | 5.25*10 <sup>-01</sup> | 1.01 (0.97 - 1.06) |
| rs2398103  | 10  | 5196096       | AKR1CL1            | C/T                 | 0.4087         | 1.35*10 <sup>-04</sup> | 1.15 (1.06 - 1.24) | 9.20*10 <sup>-01</sup> | 1.00 (0.96 - 1.05) |
| rs11253036 | 10  | 5216718       | AKR1CL1            | T/C                 | 0.6537         | 3.43*10 <sup>-04</sup> | 1.17 (1.07 - 1.27) | 1.68*10 <sup>-03</sup> | 1.10 (1.04 - 1.16) |
| rs12357686 | 10  | 5540673       | intergenic         | G/A                 | 0.7560         | 5.41*10 <sup>-04</sup> | 1.17 (1.07 - 1.29) | 1.12*10 <sup>-01</sup> | 1.04 (0.99 - 1.08) |
| rs11816050 | 10  | 5547041       | AL732437.12        | C/T                 | 0.7703         | 9.32*10 <sup>-04</sup> | 1.18 (1.07 - 1.29) | 1.48*10 <sup>-01</sup> | 1.03 (0.99 - 1.08) |
| rs2791408  | 10  | 6962346       | intergenic         | G/A                 | 0.0622         | 1.11*10 <sup>-04</sup> | 1.38 (1.17 - 1.63) | 3.97*10 <sup>-01</sup> | 1.03 (0.96 - 1.12) |
| rs546899   | 10  | 6969151       | intergenic         | T/C                 | 0.0598         | 5.98*10 <sup>-05</sup> | 1.38 (1.17 - 1.63) | 2.22*10 <sup>-02</sup> | 1.14 (1.02 - 1.28) |
| rs2038922  | 10  | 9907914       | intergenic         | T/C                 | 0.9499         | 4.36*10 <sup>-04</sup> | 1.4 (1.16 - 1.69)  | 1.30*10 <sup>-01</sup> | 1.07 (0.98 - 1.16) |
| rs2815627  | 10  | 12637496      | CAMK1D             | G/T                 | 0.6795         | 5.78*10 <sup>-04</sup> | 1.16 (1.07 - 1.26) | 9.22*10 <sup>-03</sup> | 1.06 (1.01 - 1.10) |
| rs11257888 | 10  | 12641510      | CAMK1D             | T/C                 | 0.5740         | 9.61*10 <sup>-04</sup> | 1.14 (1.05 - 1.24) | 5.18*10 <sup>-03</sup> | 1.08 (1.02 - 1.15) |
| rs928337   | 10  | 12875051      | CAMK1D             | A/G                 | 0.5863         | 3.29*10 <sup>-04</sup> | 1.14 (1.05 - 1.24) | 1.77*10 <sup>-01</sup> | 1.03 (0.99 - 1.07) |

| SNP        | Chr | Position (bp) | Gene                          | Risk/NonRisk Allele | Risk frequency | GWA                    |                    | Pooled analysis        |                    |
|------------|-----|---------------|-------------------------------|---------------------|----------------|------------------------|--------------------|------------------------|--------------------|
|            |     |               |                               |                     |                | P Value                | OR (95% CI)        | P Value                | OR (95% CI)        |
| rs11258005 | 10  | 12893468      | CAMK1D                        | G/A                 | 0.0095         | 4.95*10 <sup>-04</sup> | 2.03 (1.35 - 3.05) | 3.11*10 <sup>-01</sup> | 1.11 (0.91 - 1.36) |
| rs11253924 | 10  | 16423777      | intergenic                    | T/G                 | 0.1840         | 9.98*10 <sup>-04</sup> | 1.18 (1.07 - 1.31) | 2.40*10 <sup>-01</sup> | 1.03 (0.98 - 1.08) |
| rs7090427  | 10  | 16423937      | intergenic                    | G/A                 | 0.1850         | 8.37*10 <sup>-04</sup> | 1.19 (1.07 - 1.31) | 6.42*10 <sup>-02</sup> | 1.05 (1.00 - 1.11) |
| rs10827805 | 10  | 37934266      | AL121927.24,<br>RP11-175J10.2 | C/A                 | 0.7862         | 2.48*10 <sup>-05</sup> | 1.24 (1.12 - 1.36) | 1.97*10 <sup>-01</sup> | 1.03 (0.99 - 1.08) |
| rs17660144 | 10  | 37983220      | intergenic                    | T/C                 | 0.1794         | 2.50*10 <sup>-04</sup> | 1.22 (1.1 - 1.36)  | 6.68*10 <sup>-01</sup> | 1.01 (0.96 - 1.06) |
| rs4595495  | 10  | 53343292      | PRKG1                         | A/G                 | 0.5872         | 7.59*10 <sup>-04</sup> | 1.14 (1.06 - 1.24) | 2.77*10 <sup>-02</sup> | 1.07 (1.01 - 1.13) |
| rs2893663  | 10  | 57263103      | intergenic                    | C/T                 | 0.7276         | 2.90*10 <sup>-04</sup> | 1.18 (1.08 - 1.3)  | 1.12*10 <sup>-02</sup> | 1.05 (1.01 - 1.10) |
| rs11005987 | 10  | 59402438      | intergenic                    | C/T                 | 0.0125         | 1.65*10 <sup>-05</sup> | 1.97 (1.38 - 2.81) | 8.83*10 <sup>-01</sup> | 1.01 (0.85 - 1.20) |
| rs16911440 | 10  | 59403275      | intergenic                    | C/A                 | 0.0122         | 6.88*10 <sup>-05</sup> | 1.88 (1.31 - 2.7)  | 6.79*10 <sup>-01</sup> | 1.04 (0.86 - 1.26) |
| rs7897320  | 10  | 59403324      | intergenic                    | G/A                 | 0.0122         | 1.56*10 <sup>-04</sup> | 1.88 (1.31 - 2.69) | 5.98*10 <sup>-01</sup> | 1.05 (0.87 - 1.29) |
| rs12355784 | 10  | 64791571      | JMJD1C                        | A/C                 | 0.5083         | 8.77*10 <sup>-04</sup> | 1.15 (1.06 - 1.24) | 5.71*10 <sup>-03</sup> | 1.06 (1.02 - 1.11) |
| rs736883   | 10  | 65441008      | intergenic                    | G/A                 | 0.0228         | 7.53*10 <sup>-04</sup> | 1.57 (1.2 - 2.04)  | 2.69*10 <sup>-02</sup> | 1.22 (1.02 - 1.46) |
| rs2671507  | 10  | 65444020      | intergenic                    | A/G                 | 0.0230         | 7.27*10 <sup>-04</sup> | 1.57 (1.21 - 2.03) | 2.31*10 <sup>-03</sup> | 1.21 (1.07 - 1.37) |
| rs1249149  | 10  | 79650731      | intergenic                    | C/T                 | 0.5502         | 2.52*10 <sup>-04</sup> | 1.16 (1.07 - 1.26) | 6.79*10 <sup>-04</sup> | 1.07 (1.03 - 1.11) |
| rs1149731  | 10  | 79658086      | intergenic                    | G/A                 | 0.6824         | 2.95*10 <sup>-04</sup> | 1.16 (1.06 - 1.26) | 1.80*10 <sup>-03</sup> | 1.06 (1.02 - 1.11) |
| rs2448388  | 10  | 79658589      | intergenic                    | A/G                 | 0.6823         | 2.98*10 <sup>-04</sup> | 1.16 (1.06 - 1.26) | 1.61*10 <sup>-04</sup> | 1.08 (1.04 - 1.12) |
| rs16936710 | 10  | 80443378      | intergenic                    | A/G                 | 0.0413         | 1.33*10 <sup>-04</sup> | 1.46 (1.2 - 1.78)  | 6.09*10 <sup>-02</sup> | 1.09 (1.00 - 1.20) |
| rs16936718 | 10  | 80449010      | intergenic                    | A/G                 | 0.0400         | 6.15*10 <sup>-04</sup> | 1.4 (1.15 - 1.71)  | 9.17*10 <sup>-02</sup> | 1.10 (0.98 - 1.23) |
| rs10762836 | 10  | 80463875      | intergenic                    | T/G                 | 0.0470         | 5.28*10 <sup>-04</sup> | 1.38 (1.15 - 1.66) | 3.82*10 <sup>-02</sup> | 1.12 (1.01 - 1.25) |
| rs3910578  | 10  | 80465384      | intergenic                    | A/G                 | 0.0476         | 2.92*10 <sup>-04</sup> | 1.37 (1.14 - 1.64) | 1.07*10 <sup>-02</sup> | 1.13 (1.03 - 1.24) |
| rs10824708 | 10  | 80467529      | intergenic                    | A/G                 | 0.0483         | 2.39*10 <sup>-04</sup> | 1.37 (1.15 - 1.65) | 1.24*10 <sup>-02</sup> | 1.13 (1.03 - 1.24) |
| rs1946843  | 10  | 80467583      | intergenic                    | C/A                 | 0.0475         | 2.41*10 <sup>-04</sup> | 1.39 (1.16 - 1.67) | 1.35*10 <sup>-02</sup> | 1.13 (1.03 - 1.24) |
| rs1946844  | 10  | 80467608      | intergenic                    | C/G                 | 0.0478         | 3.04*10 <sup>-04</sup> | 1.37 (1.14 - 1.64) | 1.40*10 <sup>-02</sup> | 1.13 (1.02 - 1.24) |
| rs1439034  | 10  | 80468979      | intergenic                    | C/A                 | 0.0483         | 2.39*10 <sup>-04</sup> | 1.37 (1.15 - 1.65) | 1.20*10 <sup>-02</sup> | 1.13 (1.03 - 1.24) |
| rs7911085  | 10  | 81675250      | MBL1P1                        | G/A                 | 0.8580         | 9.56*10 <sup>-05</sup> | 1.19 (1.06 - 1.33) | 9.07*10 <sup>-02</sup> | 1.06 (0.99 - 1.13) |
| rs1412444  | 10  | 90992907      | LIPA                          | T/C                 | 0.3245         | 6.29*10 <sup>-04</sup> | 1.13 (1.04 - 1.23) | 4.12*10 <sup>-05</sup> | 1.11 (1.05 - 1.16) |
| rs2246833  | 10  | 90995834      | LIPA                          | T/C                 | 0.3270         | 6.78*10 <sup>-04</sup> | 1.13 (1.04 - 1.23) | 2.24*10 <sup>-05</sup> | 1.10 (1.05 - 1.15) |
| rs701866   | 10  | 95201576      | FER1L3                        | A/G                 | 0.9201         | 6.77*10 <sup>-04</sup> | 1.3 (1.12 - 1.52)  | 4.26*10 <sup>-02</sup> | 1.08 (1.00 - 1.17) |
| rs10491067 | 10  | 97972230      | BLNK                          | T/C                 | 0.7522         | 5.17*10 <sup>-05</sup> | 1.2 (1.09 - 1.32)  | 1.91*10 <sup>-01</sup> | 1.03 (0.99 - 1.07) |
| rs11193503 | 10  | 109223312     | intergenic                    | C/T                 | 0.0101         | 3.86*10 <sup>-04</sup> | 2.02 (1.36 - 2.99) | 9.14*10 <sup>-01</sup> | 1.01 (0.80 - 1.28) |
| rs7917932  | 10  | 115758167     | intergenic                    | A/G                 | 0.9735         | 8.57*10 <sup>-04</sup> | 1.58 (1.21 - 2.07) | 9.19*10 <sup>-03</sup> | 1.17 (1.04 - 1.33) |
| rs11198060 | 10  | 119404884     | intergenic                    | C/T                 | 0.1701         | 8.54*10 <sup>-04</sup> | 1.2 (1.08 - 1.33)  | 7.83*10 <sup>-02</sup> | 1.04 (1.00 - 1.10) |
| rs2210604  | 10  | 119991181     | C10orf84                      | G/A                 | 0.6045         | 5.29*10 <sup>-05</sup> | 1.16 (1.07 - 1.26) | 1.16*10 <sup>-01</sup> | 1.03 (0.99 - 1.07) |
| rs11198334 | 10  | 120011676     | C10orf84                      | T/C                 | 0.1651         | 3.00*10 <sup>-04</sup> | 1.22 (1.1 - 1.36)  | 2.07*10 <sup>-02</sup> | 1.06 (1.01 - 1.11) |

| SNP        | Chr | Position (bp) | Gene       | Risk/NonRisk Allele | Risk frequency | GWA                    |                    | Pooled analysis        |                    |
|------------|-----|---------------|------------|---------------------|----------------|------------------------|--------------------|------------------------|--------------------|
|            |     |               |            |                     |                | P Value                | OR (95% CI)        | P Value                | OR (95% CI)        |
| rs6599671  | 10  | 124985297     | intergenic | A/G                 | 0.1988         | 5.28*10 <sup>-04</sup> | 1.19 (1.08 - 1.32) | 8.74*10 <sup>-03</sup> | 1.10 (1.02 - 1.18) |
| rs4980271  | 10  | 125005696     | intergenic | C/A                 | 0.1958         | 5.32*10 <sup>-04</sup> | 1.19 (1.08 - 1.32) | 2.70*10 <sup>-01</sup> | 1.03 (0.98 - 1.08) |
| rs12254965 | 10  | 127287028     | intergenic | A/G                 | 0.8742         | 6.43*10 <sup>-04</sup> | 1.24 (1.1 - 1.41)  | 1.09*10 <sup>-01</sup> | 1.05 (0.99 - 1.12) |
| rs17153404 | 10  | 127365853     | C10orf122  | C/G                 | 0.0529         | 5.29*10 <sup>-04</sup> | 1.37 (1.15 - 1.63) | 5.63*10 <sup>-03</sup> | 1.14 (1.04 - 1.25) |
| rs2229599  | 10  | 129097419     | DOCK1      | T/C                 | 0.0698         | 7.53*10 <sup>-04</sup> | 1.3 (1.12 - 1.51)  | 8.49*10 <sup>-01</sup> | 1.01 (0.94 - 1.08) |
| rs2260876  | 10  | 134008306     | LRRC27     | C/A                 | 0.4089         | 5.53*10 <sup>-04</sup> | 1.16 (1.07 - 1.25) | 4.84*10 <sup>-02</sup> | 1.06 (1.00 - 1.12) |
| rs16925378 | 11  | 3633672       | ART1       | G/C                 | 0.0205         | 7.82*10 <sup>-05</sup> | 1.73 (1.31 - 2.28) | 1.22*10 <sup>-02</sup> | 1.22 (1.04 - 1.42) |
| rs16908350 | 11  | 10792454      | intergenic | T/C                 | 0.6970         | 2.55*10 <sup>-04</sup> | 1.16 (1.06 - 1.26) | 6.47*10 <sup>-01</sup> | 1.01 (0.97 - 1.05) |
| rs7937695  | 11  | 10802693      | intergenic | T/C                 | 0.6961         | 1.65*10 <sup>-04</sup> | 1.16 (1.07 - 1.27) | 5.95*10 <sup>-01</sup> | 1.01 (0.97 - 1.05) |
| rs2132521  | 11  | 10807098      | intergenic | G/A                 | 0.6967         | 1.79*10 <sup>-04</sup> | 1.16 (1.06 - 1.27) | 7.10*10 <sup>-01</sup> | 1.01 (0.97 - 1.05) |
| rs1908705  | 11  | 10811298      | intergenic | A/T                 | 0.6965         | 2.16*10 <sup>-04</sup> | 1.16 (1.06 - 1.26) | 4.95*10 <sup>-01</sup> | 1.01 (0.97 - 1.05) |
| rs10160217 | 11  | 12978400      | intergenic | A/G                 | 0.2878         | 3.84*10 <sup>-04</sup> | 1.16 (1.07 - 1.27) | 2.17*10 <sup>-01</sup> | 1.03 (0.99 - 1.07) |
| rs4483574  | 11  | 12978980      | intergenic | A/G                 | 0.2882         | 3.51*10 <sup>-04</sup> | 1.17 (1.07 - 1.27) | 2.48*10 <sup>-01</sup> | 1.02 (0.98 - 1.07) |
| rs4506627  | 11  | 12979394      | intergenic | T/C                 | 0.2882         | 3.25*10 <sup>-04</sup> | 1.17 (1.07 - 1.27) | 2.21*10 <sup>-01</sup> | 1.03 (0.98 - 1.07) |
| rs4757085  | 11  | 12980219      | intergenic | C/T                 | 0.2884         | 3.19*10 <sup>-04</sup> | 1.17 (1.07 - 1.27) | 1.86*10 <sup>-01</sup> | 1.03 (0.99 - 1.07) |
| rs1540157  | 11  | 15145985      | INSC       | A/G                 | 0.8300         | 8.41*10 <sup>-04</sup> | 1.2 (1.08 - 1.34)  | 1.97*10 <sup>-02</sup> | 1.07 (1.01 - 1.13) |
| rs1627802  | 11  | 15148537      | INSC       | G/A                 | 0.8333         | 2.97*10 <sup>-04</sup> | 1.22 (1.1 - 1.36)  | 2.90*10 <sup>-02</sup> | 1.07 (1.01 - 1.13) |
| rs905553   | 11  | 19039555      | MRGPRX2    | G/A                 | 0.3159         | 5.30*10 <sup>-04</sup> | 1.16 (1.07 - 1.26) | 3.13*10 <sup>-03</sup> | 1.06 (1.02 - 1.10) |
| rs1503502  | 11  | 19040053      | MRGPRX2    | T/C                 | 0.3851         | 2.44*10 <sup>-04</sup> | 1.16 (1.07 - 1.26) | 4.09*10 <sup>-02</sup> | 1.04 (1.00 - 1.08) |
| rs12222200 | 11  | 19040692      | MRGPRX2    | T/C                 | 0.3874         | 1.47*10 <sup>-04</sup> | 1.17 (1.08 - 1.27) | 1.86*10 <sup>-02</sup> | 1.05 (1.01 - 1.09) |
| rs11024975 | 11  | 19048646      | intergenic | A/G                 | 0.3163         | 3.17*10 <sup>-04</sup> | 1.17 (1.07 - 1.27) | 3.11*10 <sup>-03</sup> | 1.06 (1.02 - 1.10) |
| rs878256   | 11  | 19051010      | intergenic | A/C                 | 0.3154         | 8.68*10 <sup>-04</sup> | 1.15 (1.06 - 1.26) | 4.96*10 <sup>-04</sup> | 1.08 (1.03 - 1.13) |
| rs1429778  | 11  | 20821407      | NELL1      | T/G                 | 0.0555         | 8.48*10 <sup>-05</sup> | 1.33 (1.12 - 1.58) | 1.33*10 <sup>-02</sup> | 1.11 (1.02 - 1.20) |
| rs10833429 | 11  | 20969470      | NELL1      | A/G                 | 0.7744         | 3.82*10 <sup>-04</sup> | 1.19 (1.08 - 1.31) | 3.04*10 <sup>-02</sup> | 1.05 (1.00 - 1.10) |
| rs7927234  | 11  | 27392932      | LGR4       | C/G                 | 0.1074         | 8.42*10 <sup>-04</sup> | 1.24 (1.1 - 1.41)  | 6.11*10 <sup>-03</sup> | 1.09 (1.03 - 1.17) |
| rs473241   | 11  | 30451981      | MPPED2     | C/T                 | 0.9348         | 2.00*10 <sup>-04</sup> | 1.38 (1.16 - 1.63) | 2.23*10 <sup>-02</sup> | 1.11 (1.02 - 1.22) |
| rs7942782  | 11  | 38252542      | intergenic | T/G                 | 0.0365         | 5.32*10 <sup>-04</sup> | 1.44 (1.17 - 1.78) | 6.24*10 <sup>-01</sup> | 1.03 (0.92 - 1.14) |
| rs10836958 | 11  | 38302620      | intergenic | C/T                 | 0.0437         | 7.11*10 <sup>-04</sup> | 1.39 (1.14 - 1.68) | 4.97*10 <sup>-02</sup> | 1.14 (1.00 - 1.31) |
| rs10501200 | 11  | 38439360      | intergenic | T/C                 | 0.0293         | 6.29*10 <sup>-04</sup> | 1.49 (1.18 - 1.88) | 7.37*10 <sup>-01</sup> | 1.02 (0.91 - 1.15) |
| rs1913033  | 11  | 38826444      | intergenic | T/A                 | 0.6261         | 1.11*10 <sup>-04</sup> | 1.16 (1.07 - 1.27) | 6.00*10 <sup>-01</sup> | 1.01 (0.97 - 1.05) |
| rs994587   | 11  | 39357202      | intergenic | A/G                 | 0.3590         | 4.59*10 <sup>-04</sup> | 1.16 (1.07 - 1.26) | 7.34*10 <sup>-01</sup> | 1.01 (0.97 - 1.05) |
| rs12420372 | 11  | 48454179      | intergenic | T/G                 | 0.6252         | 5.33*10 <sup>-04</sup> | 1.16 (1.06 - 1.26) | 9.29*10 <sup>-03</sup> | 1.05 (1.01 - 1.09) |
| rs7395662  | 11  | 48475469      | intergenic | G/A                 | 0.6257         | 2.74*10 <sup>-04</sup> | 1.17 (1.07 - 1.27) | 8.61*10 <sup>-03</sup> | 1.05 (1.01 - 1.09) |
| rs11039819 | 11  | 48518757      | intergenic | T/G                 | 0.6277         | 2.62*10 <sup>-04</sup> | 1.17 (1.07 - 1.27) | 1.78*10 <sup>-03</sup> | 1.07 (1.02 - 1.11) |
| rs11039820 | 11  | 48518828      | intergenic | G/A                 | 0.6258         | 2.81*10 <sup>-04</sup> | 1.16 (1.07 - 1.27) | 7.58*10 <sup>-03</sup> | 1.05 (1.01 - 1.09) |

| SNP        | Chr | Position (bp) | Gene       | Risk/NonRisk Allele | Risk frequency | GWA                    |                    | Pooled analysis        |                    |
|------------|-----|---------------|------------|---------------------|----------------|------------------------|--------------------|------------------------|--------------------|
|            |     |               |            |                     |                | P Value                | OR (95% CI)        | P Value                | OR (95% CI)        |
| rs4882017  | 11  | 48526758      | intergenic | G/A                 | 0.6255         | 2.99*10 <sup>-04</sup> | 1.16 (1.07 - 1.26) | 8.28*10 <sup>-03</sup> | 1.05 (1.01 - 1.09) |
| rs10838954 | 11  | 48535899      | intergenic | A/G                 | 0.6259         | 2.99*10 <sup>-04</sup> | 1.16 (1.07 - 1.26) | 8.54*10 <sup>-03</sup> | 1.05 (1.01 - 1.09) |
| rs6485872  | 11  | 48536286      | intergenic | G/T                 | 0.6256         | 2.88*10 <sup>-04</sup> | 1.16 (1.07 - 1.27) | 7.58*10 <sup>-03</sup> | 1.05 (1.01 - 1.09) |
| rs6485882  | 11  | 48549011      | intergenic | G/C                 | 0.6236         | 4.61*10 <sup>-04</sup> | 1.16 (1.07 - 1.26) | 9.11*10 <sup>-03</sup> | 1.05 (1.01 - 1.09) |
| rs4882132  | 11  | 48549701      | intergenic | T/C                 | 0.6261         | 3.44*10 <sup>-04</sup> | 1.16 (1.07 - 1.26) | 1.80*10 <sup>-04</sup> | 1.10 (1.04 - 1.15) |
| rs11039871 | 11  | 48583196      | intergenic | C/T                 | 0.6244         | 3.75*10 <sup>-04</sup> | 1.16 (1.07 - 1.26) | 1.16*10 <sup>-02</sup> | 1.05 (1.01 - 1.09) |
| rs11040016 | 11  | 48740073      | intergenic | T/C                 | 0.6256         | 3.91*10 <sup>-04</sup> | 1.16 (1.07 - 1.26) | 2.28*10 <sup>-03</sup> | 1.06 (1.02 - 1.11) |
| rs8188975  | 11  | 48848453      | intergenic | A/G                 | 0.6221         | 7.38*10 <sup>-04</sup> | 1.15 (1.06 - 1.25) | 1.03*10 <sup>-03</sup> | 1.10 (1.04 - 1.17) |
| rs612040   | 11  | 73815199      | intergenic | A/C                 | 0.4645         | 4.75*10 <sup>-05</sup> | 1.17 (1.08 - 1.27) | 8.29*10 <sup>-02</sup> | 1.03 (1.00 - 1.07) |
| rs11236106 | 11  | 73828072      | intergenic | G/A                 | 0.4613         | 7.97*10 <sup>-05</sup> | 1.17 (1.08 - 1.27) | 1.17*10 <sup>-01</sup> | 1.03 (0.99 - 1.07) |
| rs10793085 | 11  | 73830656      | intergenic | T/C                 | 0.4636         | 1.54*10 <sup>-04</sup> | 1.16 (1.07 - 1.26) | 7.72*10 <sup>-02</sup> | 1.03 (1.00 - 1.07) |
| rs17412370 | 11  | 80404012      | intergenic | T/G                 | 0.7834         | 1.18*10 <sup>-04</sup> | 1.22 (1.1 - 1.34)  | 9.36*10 <sup>-05</sup> | 1.11 (1.05 - 1.17) |
| rs4944277  | 11  | 80435550      | intergenic | A/G                 | 0.4993         | 3.00*10 <sup>-04</sup> | 1.16 (1.07 - 1.25) | 2.49*10 <sup>-02</sup> | 1.05 (1.01 - 1.09) |
| rs4945476  | 11  | 80435774      | intergenic | C/G                 | 0.4991         | 5.79*10 <sup>-04</sup> | 1.15 (1.06 - 1.24) | 3.05*10 <sup>-02</sup> | 1.05 (1.00 - 1.09) |
| rs1533866  | 11  | 80440791      | intergenic | C/T                 | 0.5022         | 9.31*10 <sup>-04</sup> | 1.14 (1.06 - 1.24) | 3.39*10 <sup>-02</sup> | 1.05 (1.00 - 1.10) |
| rs12789328 | 11  | 82497967      | intergenic | A/C                 | 0.0501         | 9.56*10 <sup>-04</sup> | 1.35 (1.12 - 1.61) | 1.11*10 <sup>-01</sup> | 1.07 (0.99 - 1.16) |
| rs515718   | 11  | 82617399      | ANKRD42    | C/T                 | 0.6483         | 1.70*10 <sup>-04</sup> | 1.17 (1.08 - 1.27) | 9.19*10 <sup>-02</sup> | 1.04 (0.99 - 1.08) |
| rs506321   | 11  | 82641936      | ANKRD42    | A/G                 | 0.6392         | 1.41*10 <sup>-04</sup> | 1.17 (1.08 - 1.28) | 1.53*10 <sup>-01</sup> | 1.03 (0.99 - 1.07) |
| rs1278402  | 11  | 82649745      | CCDC90B    | A/G                 | 0.7389         | 4.22*10 <sup>-04</sup> | 1.18 (1.08 - 1.3)  | 5.86*10 <sup>-01</sup> | 1.01 (0.96 - 1.07) |
| rs673850   | 11  | 82690410      | intergenic | G/C                 | 0.6424         | 6.71*10 <sup>-05</sup> | 1.18 (1.09 - 1.29) | 3.92*10 <sup>-02</sup> | 1.04 (1.00 - 1.09) |
| rs17517294 | 11  | 82726203      | intergenic | C/T                 | 0.0974         | 6.81*10 <sup>-04</sup> | 1.26 (1.1 - 1.44)  | 2.22*10 <sup>-02</sup> | 1.08 (1.01 - 1.15) |
| rs6592113  | 11  | 82743548      | intergenic | G/A                 | 0.6052         | 2.59*10 <sup>-04</sup> | 1.16 (1.07 - 1.26) | 1.91*10 <sup>-01</sup> | 1.02 (0.99 - 1.06) |
| rs7124362  | 11  | 82743579      | intergenic | C/T                 | 0.6453         | 5.11*10 <sup>-06</sup> | 1.21 (1.12 - 1.32) | 9.12*10 <sup>-03</sup> | 1.08 (1.02 - 1.15) |
| rs2512674  | 11  | 82839423      | DLG2       | C/T                 | 0.6374         | 3.82*10 <sup>-05</sup> | 1.19 (1.1 - 1.29)  | 2.94*10 <sup>-01</sup> | 1.02 (0.98 - 1.06) |
| rs2507847  | 11  | 82839996      | DLG2       | T/C                 | 0.6313         | 1.17*10 <sup>-04</sup> | 1.18 (1.08 - 1.28) | 3.42*10 <sup>-01</sup> | 1.02 (0.98 - 1.06) |
| rs2507848  | 11  | 82840048      | DLG2       | G/C                 | 0.6336         | 1.04*10 <sup>-04</sup> | 1.18 (1.08 - 1.28) | 3.62*10 <sup>-01</sup> | 1.02 (0.98 - 1.06) |
| rs2507850  | 11  | 82843293      | DLG2       | G/A                 | 0.6490         | 8.98*10 <sup>-06</sup> | 1.21 (1.11 - 1.32) | 3.19*10 <sup>-01</sup> | 1.02 (0.98 - 1.06) |
| rs1075719  | 11  | 82852684      | DLG2       | T/C                 | 0.7178         | 6.30*10 <sup>-04</sup> | 1.17 (1.07 - 1.27) | 1.79*10 <sup>-01</sup> | 1.03 (0.99 - 1.07) |
| rs891773   | 11  | 82853427      | DLG2       | T/C                 | 0.7196         | 3.59*10 <sup>-04</sup> | 1.17 (1.08 - 1.28) | 2.03*10 <sup>-01</sup> | 1.03 (0.99 - 1.07) |
| rs7108874  | 11  | 82856041      | DLG2       | C/T                 | 0.7326         | 6.68*10 <sup>-05</sup> | 1.2 (1.1 - 1.31)   | 3.27*10 <sup>-01</sup> | 1.02 (0.98 - 1.06) |
| rs1939105  | 11  | 86254742      | intergenic | A/G                 | 0.5996         | 4.07*10 <sup>-05</sup> | 1.19 (1.1 - 1.3)   | 3.76*10 <sup>-03</sup> | 1.06 (1.02 - 1.10) |
| rs12801237 | 11  | 86279076      | intergenic | A/T                 | 0.5882         | 1.06*10 <sup>-04</sup> | 1.18 (1.09 - 1.28) | 2.99*10 <sup>-03</sup> | 1.06 (1.02 - 1.10) |
| rs17149491 | 11  | 86283707      | intergenic | G/A                 | 0.1234         | 5.30*10 <sup>-04</sup> | 1.24 (1.1 - 1.4)   | 2.55*10 <sup>-01</sup> | 1.03 (0.98 - 1.09) |
| rs1789158  | 11  | 106877275     | ALKBH8     | C/A                 | 0.9112         | 7.15*10 <sup>-04</sup> | 1.28 (1.11 - 1.48) | 8.70*10 <sup>-01</sup> | 1.01 (0.94 - 1.07) |
| rs10892117 | 11  | 116830688     | DSCAML1    | C/T                 | 0.0718         | 1.63*10 <sup>-04</sup> | 1.34 (1.15 - 1.57) | 1.46*10 <sup>-01</sup> | 1.07 (0.98 - 1.17) |

| SNP        | Chr | Position (bp) | Gene             | Risk/NonRisk Allele | Risk frequency | GWA                    |                    | Pooled analysis        |                    |
|------------|-----|---------------|------------------|---------------------|----------------|------------------------|--------------------|------------------------|--------------------|
|            |     |               |                  |                     |                | P Value                | OR (95% CI)        | P Value                | OR (95% CI)        |
| rs12098917 | 11  | 117221361     | FXVD6            | C/T                 | 0.1595         | 7.62*10 <sup>-04</sup> | 1.2 (1.08 - 1.34)  | 4.58*10 <sup>-03</sup> | 1.09 (1.03 - 1.16) |
| rs530291   | 11  | 119494779     | TRIM29           | T/C                 | 0.0321         | 8.48*10 <sup>-04</sup> | 1.45 (1.16 - 1.81) | 5.57*10 <sup>-01</sup> | 1.05 (0.90 - 1.21) |
| rs10790424 | 11  | 120642730     | intergenic       | T/C                 | 0.2817         | 3.31*10 <sup>-04</sup> | 1.17 (1.08 - 1.28) | 3.70*10 <sup>-03</sup> | 1.06 (1.02 - 1.11) |
| rs10790443 | 11  | 120739341     | AP002959.2       | C/A                 | 0.3106         | 3.38*10 <sup>-04</sup> | 1.17 (1.07 - 1.28) | 1.59*10 <sup>-02</sup> | 1.08 (1.01 - 1.14) |
| rs72991    | 11  | 120748926     | intergenic       | C/T                 | 0.2674         | 2.82*10 <sup>-04</sup> | 1.18 (1.08 - 1.29) | 2.69*10 <sup>-01</sup> | 1.02 (0.98 - 1.07) |
| rs985421   | 11  | 120867526     | SORL1            | G/A                 | 0.9837         | 1.23*10 <sup>-04</sup> | 1.98 (1.39 - 2.83) | 4.98*10 <sup>-02</sup> | 1.19 (1.00 - 1.41) |
| rs11218351 | 11  | 120958917     | SORL1            | T/C                 | 0.0802         | 9.35*10 <sup>-04</sup> | 1.28 (1.11 - 1.48) | 6.65*10 <sup>-01</sup> | 1.02 (0.94 - 1.09) |
| rs7126620  | 11  | 122247638     | CRTAM            | G/T                 | 0.1684         | 9.75*10 <sup>-04</sup> | 1.19 (1.07 - 1.33) | 1.20*10 <sup>-01</sup> | 1.04 (0.99 - 1.10) |
| rs3107635  | 11  | 122286766     | C11orf63         | G/A                 | 0.1604         | 3.39*10 <sup>-04</sup> | 1.22 (1.1 - 1.36)  | 2.56*10 <sup>-02</sup> | 1.07 (1.01 - 1.14) |
| rs2512284  | 11  | 123591632     | OR8G2            | A/G                 | 0.4978         | 8.53*10 <sup>-04</sup> | 1.14 (1.06 - 1.24) | 3.86*10 <sup>-01</sup> | 1.02 (0.98 - 1.06) |
| rs954838   | 11  | 126834560     | intergenic       | G/T                 | 0.3798         | 9.70*10 <sup>-04</sup> | 1.15 (1.06 - 1.25) | 4.07*10 <sup>-03</sup> | 1.06 (1.02 - 1.11) |
| rs11221362 | 11  | 127955429     | intergenic       | C/A                 | 0.9617         | 9.27*10 <sup>-04</sup> | 1.44 (1.16 - 1.8)  | 2.73*10 <sup>-01</sup> | 1.06 (0.96 - 1.17) |
| rs1395504  | 11  | 132234377     | OPCML            | G/T                 | 0.4647         | 6.59*10 <sup>-04</sup> | 1.15 (1.06 - 1.25) | 1.42*10 <sup>-01</sup> | 1.03 (0.99 - 1.07) |
| rs4937883  | 11  | 133798653     | intergenic       | G/A                 | 0.9315         | 9.00*10 <sup>-04</sup> | 1.32 (1.12 - 1.56) | 4.35*10 <sup>-01</sup> | 1.04 (0.95 - 1.13) |
| rs10773979 | 12  | 1659125       | intergenic       | A/C                 | 0.1615         | 1.57*10 <sup>-04</sup> | 1.21 (1.09 - 1.35) | 3.45*10 <sup>-02</sup> | 1.06 (1.00 - 1.11) |
| rs1863657  | 12  | 22892233      | intergenic       | T/C                 | 0.5318         | 2.15*10 <sup>-04</sup> | 1.16 (1.07 - 1.26) | 9.67*10 <sup>-01</sup> | 1.00 (0.96 - 1.04) |
| rs1861932  | 12  | 67172800      | intergenic       | T/C                 | 0.8637         | 5.68*10 <sup>-04</sup> | 1.23 (1.1 - 1.39)  | 2.35*10 <sup>-02</sup> | 1.07 (1.01 - 1.13) |
| rs10878977 | 12  | 68085957      | SRP_euk_arch     | T/C                 | 0.7525         | 1.04*10 <sup>-04</sup> | 1.21 (1.1 - 1.32)  | 2.39*10 <sup>-04</sup> | 1.08 (1.04 - 1.13) |
| rs11177666 | 12  | 68111378      | intergenic       | A/G                 | 0.8649         | 5.28*10 <sup>-04</sup> | 1.24 (1.1 - 1.4)   | 1.58*10 <sup>-02</sup> | 1.08 (1.01 - 1.15) |
| rs2707126  | 12  | 77433783      | intergenic       | C/T                 | 0.8241         | 8.51*10 <sup>-04</sup> | 1.2 (1.08 - 1.33)  | 6.80*10 <sup>-01</sup> | 1.01 (0.96 - 1.06) |
| rs17691177 | 12  | 80654496      | PPFIA2           | T/G                 | 0.8255         | 4.25*10 <sup>-04</sup> | 1.21 (1.09 - 1.35) | 2.07*10 <sup>-01</sup> | 1.03 (0.98 - 1.08) |
| rs10506852 | 12  | 80687070      | intergenic       | G/A                 | 0.6258         | 4.93*10 <sup>-04</sup> | 1.16 (1.07 - 1.26) | 2.29*10 <sup>-01</sup> | 1.02 (0.99 - 1.06) |
| rs12307959 | 12  | 80757555      | intergenic       | G/A                 | 0.8292         | 4.08*10 <sup>-04</sup> | 1.21 (1.09 - 1.35) | 2.05*10 <sup>-01</sup> | 1.03 (0.98 - 1.08) |
| rs10777699 | 12  | 94445392      | USP44            | C/G                 | 0.5351         | 3.05*10 <sup>-04</sup> | 1.16 (1.07 - 1.26) | 2.53*10 <sup>-02</sup> | 1.04 (1.01 - 1.08) |
| rs2373455  | 12  | 100417052     | intergenic       | T/C                 | 0.4724         | 8.20*10 <sup>-04</sup> | 1.15 (1.06 - 1.24) | 1.41*10 <sup>-02</sup> | 1.06 (1.01 - 1.11) |
| rs733328   | 12  | 100417290     | intergenic       | C/A                 | 0.3751         | 5.39*10 <sup>-04</sup> | 1.16 (1.07 - 1.26) | 7.42*10 <sup>-02</sup> | 1.04 (1.00 - 1.08) |
| rs733327   | 12  | 100417446     | intergenic       | A/G                 | 0.4412         | 4.59*10 <sup>-04</sup> | 1.16 (1.07 - 1.25) | 8.76*10 <sup>-03</sup> | 1.06 (1.01 - 1.11) |
| rs11614937 | 12  | 100417857     | intergenic       | A/G                 | 0.4720         | 6.49*10 <sup>-04</sup> | 1.15 (1.06 - 1.25) | 1.18*10 <sup>-02</sup> | 1.06 (1.01 - 1.11) |
| rs11112867 | 12  | 105020976     | NUAK1            | G/T                 | 0.7762         | 2.68*10 <sup>-04</sup> | 1.19 (1.07 - 1.31) | 3.93*10 <sup>-01</sup> | 1.02 (0.98 - 1.07) |
| rs2062906  | 12  | 116732449     | KSR2             | T/A                 | 0.8789         | 3.09*10 <sup>-04</sup> | 1.26 (1.11 - 1.43) | 3.59*10 <sup>-01</sup> | 1.03 (0.97 - 1.10) |
| rs4767629  | 12  | 116739460     | KSR2             | G/T                 | 0.8798         | 3.60*10 <sup>-04</sup> | 1.26 (1.11 - 1.42) | 3.82*10 <sup>-01</sup> | 1.03 (0.96 - 1.11) |
| rs7299238  | 12  | 119546133     | intergenic       | A/G                 | 0.3175         | 7.57*10 <sup>-04</sup> | 1.16 (1.06 - 1.26) | 6.52*10 <sup>-03</sup> | 1.06 (1.02 - 1.10) |
| rs10846531 | 12  | 122664565     | DDX55,<br>SNORA9 | G/C                 | 0.1526         | 2.94*10 <sup>-04</sup> | 1.23 (1.1 - 1.37)  | 2.18*10 <sup>-01</sup> | 1.03 (0.98 - 1.08) |
| rs4765195  | 12  | 124022458     | DHX37            | T/C                 | 0.2511         | 2.94*10 <sup>-04</sup> | 1.19 (1.08 - 1.3)  | 1.94*10 <sup>-01</sup> | 1.04 (0.98 - 1.11) |

| SNP        | Chr | Position (bp) | Gene          | Risk/NonRisk Allele | Risk frequency | GWA                    |                    | Pooled analysis        |                    |
|------------|-----|---------------|---------------|---------------------|----------------|------------------------|--------------------|------------------------|--------------------|
|            |     |               |               |                     |                | P Value                | OR (95% CI)        | P Value                | OR (95% CI)        |
| rs619302   | 12  | 129086627     | AC055717.36   | T/C                 | 0.3842         | 8.74*10 <sup>-04</sup> | 1.15 (1.06 - 1.25) | 2.02*10 <sup>-01</sup> | 1.03 (0.99 - 1.07) |
| rs7299940  | 12  | 129956707     | Y_RNA         | G/C                 | 0.5670         | 4.26*10 <sup>-04</sup> | 1.12 (1.03 - 1.21) | 7.91*10 <sup>-01</sup> | 1.00 (0.97 - 1.04) |
| rs11061560 | 12  | 130537457     | intergenic    | C/T                 | 0.8489         | 8.63*10 <sup>-04</sup> | 1.21 (1.08 - 1.36) | 8.77*10 <sup>-01</sup> | 1.00 (0.95 - 1.06) |
| rs12716699 | 13  | 21677237      | intergenic    | T/C                 | 0.7348         | 7.66*10 <sup>-04</sup> | 1.17 (1.07 - 1.28) | 6.20*10 <sup>-01</sup> | 1.01 (0.97 - 1.05) |
| rs4262814  | 13  | 28945180      | intergenic    | A/T                 | 0.1195         | 9.35*10 <sup>-04</sup> | 1.23 (1.09 - 1.39) | 8.13*10 <sup>-01</sup> | 1.01 (0.94 - 1.08) |
| rs17076673 | 13  | 31279039      | RXFP2         | A/G                 | 0.1449         | 4.15*10 <sup>-04</sup> | 1.22 (1.09 - 1.36) | 7.90*10 <sup>-02</sup> | 1.05 (0.99 - 1.10) |
| rs10492606 | 13  | 31281225      | intergenic    | C/T                 | 0.1473         | 5.28*10 <sup>-04</sup> | 1.22 (1.09 - 1.36) | 6.32*10 <sup>-02</sup> | 1.05 (1.00 - 1.11) |
| rs594679   | 13  | 36400102      | RP11-421P11.8 | C/G                 | 0.4182         | 6.44*10 <sup>-04</sup> | 1.13 (1.04 - 1.23) | 6.39*10 <sup>-03</sup> | 1.08 (1.02 - 1.15) |
| rs9549168  | 13  | 39784355      | intergenic    | C/T                 | 0.4410         | 4.70*10 <sup>-05</sup> | 1.16 (1.07 - 1.26) | 7.16*10 <sup>-02</sup> | 1.05 (1.00 - 1.11) |
| rs13378575 | 13  | 43825384      | intergenic    | C/T                 | 0.9351         | 2.02*10 <sup>-04</sup> | 1.37 (1.16 - 1.63) | 5.90*10 <sup>-03</sup> | 1.12 (1.03 - 1.21) |
| rs1041711  | 13  | 44004018      | TSC22D1       | C/T                 | 0.9603         | 4.42*10 <sup>-04</sup> | 1.45 (1.17 - 1.8)  | 6.79*10 <sup>-02</sup> | 1.10 (0.99 - 1.22) |
| rs9534145  | 13  | 44908470      | RP11-38J6.1   | A/C                 | 0.5844         | 7.55*10 <sup>-04</sup> | 1.15 (1.06 - 1.25) | 1.98*10 <sup>-01</sup> | 1.03 (0.99 - 1.07) |
| rs7324600  | 13  | 45245355      | intergenic    | G/A                 | 0.0653         | 1.24*10 <sup>-04</sup> | 1.37 (1.17 - 1.61) | 2.02*10 <sup>-02</sup> | 1.10 (1.01 - 1.19) |
| rs17068501 | 13  | 46113908      | LRCH1         | A/G                 | 0.8915         | 8.74*10 <sup>-05</sup> | 1.31 (1.14 - 1.49) | 7.79*10 <sup>-01</sup> | 1.01 (0.95 - 1.07) |
| rs6561324  | 13  | 46142405      | LRCH1         | G/A                 | 0.8883         | 3.27*10 <sup>-04</sup> | 1.27 (1.12 - 1.45) | 5.68*10 <sup>-01</sup> | 1.02 (0.96 - 1.08) |
| rs9645940  | 13  | 46143992      | LRCH1         | T/C                 | 0.8890         | 5.64*10 <sup>-04</sup> | 1.26 (1.11 - 1.44) | 8.36*10 <sup>-01</sup> | 1.01 (0.95 - 1.07) |
| rs17068595 | 13  | 46144505      | LRCH1         | G/T                 | 0.9283         | 7.05*10 <sup>-04</sup> | 1.32 (1.13 - 1.55) | 6.25*10 <sup>-01</sup> | 1.02 (0.95 - 1.09) |
| rs4942931  | 13  | 50072312      | intergenic    | T/C                 | 0.5481         | 3.35*10 <sup>-04</sup> | 1.15 (1.06 - 1.25) | 2.04*10 <sup>-03</sup> | 1.07 (1.02 - 1.12) |
| rs6562437  | 13  | 65609441      | intergenic    | A/G                 | 0.5799         | 1.75*10 <sup>-04</sup> | 1.16 (1.06 - 1.26) | 5.54*10 <sup>-01</sup> | 1.01 (0.97 - 1.06) |
| rs891643   | 13  | 67744600      | intergenic    | T/C                 | 0.3663         | 7.18*10 <sup>-04</sup> | 1.15 (1.06 - 1.25) | 9.55*10 <sup>-02</sup> | 1.04 (0.99 - 1.08) |
| rs9541316  | 13  | 67754079      | intergenic    | A/G                 | 0.3707         | 6.35*10 <sup>-04</sup> | 1.15 (1.06 - 1.25) | 1.94*10 <sup>-01</sup> | 1.03 (0.99 - 1.06) |
| rs9541317  | 13  | 67761954      | RP11-520F24.2 | G/A                 | 0.3643         | 6.85*10 <sup>-04</sup> | 1.15 (1.06 - 1.25) | 2.70*10 <sup>-01</sup> | 1.02 (0.98 - 1.06) |
| rs6562522  | 13  | 67769430      | RP11-520F24.1 | C/G                 | 0.3606         | 9.46*10 <sup>-04</sup> | 1.15 (1.06 - 1.25) | 1.95*10 <sup>-01</sup> | 1.03 (0.99 - 1.06) |
| rs7332897  | 13  | 67773416      | RP11-520F24.1 | A/G                 | 0.3645         | 7.85*10 <sup>-04</sup> | 1.15 (1.06 - 1.25) | 2.88*10 <sup>-01</sup> | 1.02 (0.98 - 1.06) |
| rs9529327  | 13  | 67796857      | intergenic    | A/C                 | 0.3708         | 8.56*10 <sup>-04</sup> | 1.15 (1.06 - 1.25) | 3.21*10 <sup>-01</sup> | 1.02 (0.98 - 1.06) |
| rs9541322  | 13  | 67805872      | RP11-520F24.3 | G/A                 | 0.3650         | 7.93*10 <sup>-04</sup> | 1.15 (1.06 - 1.25) | 2.40*10 <sup>-01</sup> | 1.02 (0.99 - 1.06) |
| rs17086847 | 13  | 69824408      | intergenic    | T/C                 | 0.0854         | 6.84*10 <sup>-04</sup> | 1.28 (1.11 - 1.47) | 9.16*10 <sup>-02</sup> | 1.06 (0.99 - 1.14) |
| rs17086923 | 13  | 69835751      | intergenic    | T/C                 | 0.0833         | 4.29*10 <sup>-04</sup> | 1.29 (1.12 - 1.49) | 3.91*10 <sup>-01</sup> | 1.03 (0.96 - 1.10) |
| rs9600699  | 13  | 75857025      | intergenic    | T/G                 | 0.0784         | 2.96*10 <sup>-04</sup> | 1.31 (1.13 - 1.52) | 3.82*10 <sup>-01</sup> | 1.03 (0.96 - 1.12) |
| rs16955846 | 13  | 98233139      | intergenic    | C/T                 | 0.7191         | 4.31*10 <sup>-04</sup> | 1.17 (1.07 - 1.28) | 5.72*10 <sup>-02</sup> | 1.05 (1.00 - 1.09) |
| rs1821542  | 13  | 109146713     | intergenic    | G/A                 | 0.9574         | 8.19*10 <sup>-04</sup> | 1.42 (1.15 - 1.74) | 8.05*10 <sup>-04</sup> | 1.20 (1.08 - 1.34) |
| rs9587963  | 13  | 109150490     | intergenic    | A/C                 | 0.9685         | 6.50*10 <sup>-05</sup> | 1.65 (1.29 - 2.12) | 1.84*10 <sup>-02</sup> | 1.17 (1.03 - 1.34) |
| rs8001174  | 13  | 109254227     | intergenic    | T/G                 | 0.3963         | 5.83*10 <sup>-04</sup> | 1.16 (1.06 - 1.25) | 2.70*10 <sup>-02</sup> | 1.05 (1.01 - 1.09) |
| rs8001629  | 13  | 113134783     | ADPRHL1       | C/T                 | 0.0473         | 7.38*10 <sup>-04</sup> | 1.37 (1.14 - 1.65) | 7.24*10 <sup>-02</sup> | 1.22 (0.98 - 1.50) |
| rs977123   | 14  | 29053877      | intergenic    | G/A                 | 0.8981         | 2.99*10 <sup>-04</sup> | 1.29 (1.12 - 1.48) | 8.34*10 <sup>-03</sup> | 1.08 (1.02 - 1.15) |



| SNP        | Chr | Position (bp) | Gene                        | Risk/NonRisk Allele | Risk frequency | GWA                    |                    | Pooled analysis        |                    |
|------------|-----|---------------|-----------------------------|---------------------|----------------|------------------------|--------------------|------------------------|--------------------|
|            |     |               |                             |                     |                | P Value                | OR (95% CI)        | P Value                | OR (95% CI)        |
| rs977122   | 14  | 29054049      | intergenic                  | C/A                 | 0.8794         | 7.59*10 <sup>-04</sup> | 1.24 (1.1 - 1.41)  | 6.62*10 <sup>-02</sup> | 1.05 (1.00 - 1.11) |
| rs4981191  | 14  | 32986367      | NPAS3                       | A/G                 | 0.1531         | 3.53*10 <sup>-04</sup> | 1.21 (1.08 - 1.34) | 5.16*10 <sup>-02</sup> | 1.07 (1.00 - 1.13) |
| rs12434640 | 14  | 47970228      | intergenic                  | G/T                 | 0.1610         | 3.98*10 <sup>-06</sup> | 1.22 (1.09 - 1.36) | 3.66*10 <sup>-02</sup> | 1.06 (1.00 - 1.13) |
| rs10083389 | 14  | 47989758      | intergenic                  | G/A                 | 0.1448         | 2.13*10 <sup>-05</sup> | 1.21 (1.08 - 1.36) | 1.41*10 <sup>-02</sup> | 1.07 (1.01 - 1.14) |
| rs10873099 | 14  | 56230692      | intergenic                  | A/G                 | 0.4637         | 7.07*10 <sup>-04</sup> | 1.14 (1.05 - 1.24) | 1.99*10 <sup>-01</sup> | 1.02 (0.99 - 1.06) |
| rs17779877 | 14  | 65840963      | intergenic                  | G/C                 | 0.0946         | 5.55*10 <sup>-05</sup> | 1.31 (1.14 - 1.5)  | 2.01*10 <sup>-02</sup> | 1.08 (1.01 - 1.15) |
| rs7160622  | 14  | 65870632      | intergenic                  | T/C                 | 0.1213         | 1.55*10 <sup>-04</sup> | 1.26 (1.11 - 1.42) | 9.80*10 <sup>-02</sup> | 1.05 (0.99 - 1.12) |
| rs7149488  | 14  | 65893425      | intergenic                  | T/C                 | 0.1239         | 3.34*10 <sup>-04</sup> | 1.23 (1.09 - 1.38) | 1.22*10 <sup>-01</sup> | 1.05 (0.99 - 1.12) |
| rs12589479 | 14  | 65963473      | intergenic                  | A/G                 | 0.1236         | 2.56*10 <sup>-04</sup> | 1.23 (1.09 - 1.38) | 1.08*10 <sup>-01</sup> | 1.05 (0.99 - 1.12) |
| rs735957   | 14  | 65965477      | intergenic                  | A/G                 | 0.1235         | 3.12*10 <sup>-04</sup> | 1.23 (1.09 - 1.38) | 1.02*10 <sup>-01</sup> | 1.05 (0.99 - 1.12) |
| rs933039   | 14  | 65973000      | intergenic                  | G/A                 | 0.1230         | 1.23*10 <sup>-04</sup> | 1.25 (1.11 - 1.4)  | 7.43*10 <sup>-02</sup> | 1.06 (0.99 - 1.13) |
| rs7146723  | 14  | 66038848      | C14orf53                    | T/A                 | 0.1193         | 1.90*10 <sup>-05</sup> | 1.28 (1.14 - 1.45) | 1.32*10 <sup>-02</sup> | 1.07 (1.01 - 1.14) |
| rs7146849  | 14  | 66101823      | GPHN                        | C/T                 | 0.1242         | 1.69*10 <sup>-04</sup> | 1.24 (1.1 - 1.4)   | 7.81*10 <sup>-02</sup> | 1.06 (0.99 - 1.12) |
| rs9783601  | 14  | 66218692      | GPHN                        | C/T                 | 0.1239         | 3.12*10 <sup>-04</sup> | 1.23 (1.09 - 1.39) | 7.84*10 <sup>-02</sup> | 1.06 (0.99 - 1.12) |
| rs6573706  | 14  | 66220517      | GPHN                        | A/T                 | 0.1235         | 2.72*10 <sup>-04</sup> | 1.23 (1.09 - 1.39) | 7.76*10 <sup>-02</sup> | 1.06 (0.99 - 1.12) |
| rs7157740  | 14  | 66231094      | GPHN                        | G/A                 | 0.1242         | 2.19*10 <sup>-04</sup> | 1.24 (1.1 - 1.39)  | 7.06*10 <sup>-02</sup> | 1.06 (1.00 - 1.13) |
| rs7154017  | 14  | 66233836      | GPHN                        | C/A                 | 0.1241         | 2.69*10 <sup>-04</sup> | 1.23 (1.09 - 1.39) | 7.66*10 <sup>-02</sup> | 1.06 (0.99 - 1.12) |
| rs1885198  | 14  | 66234513      | GPHN                        | T/C                 | 0.1228         | 4.03*10 <sup>-04</sup> | 1.22 (1.09 - 1.38) | 1.09*10 <sup>-01</sup> | 1.05 (0.99 - 1.12) |
| rs17836572 | 14  | 66262776      | GPHN                        | G/A                 | 0.1238         | 1.36*10 <sup>-04</sup> | 1.24 (1.1 - 1.4)   | 6.09*10 <sup>-02</sup> | 1.06 (1.00 - 1.13) |
| rs6573719  | 14  | 66278401      | GPHN                        | C/T                 | 0.1242         | 2.14*10 <sup>-04</sup> | 1.24 (1.1 - 1.39)  | 6.96*10 <sup>-02</sup> | 1.06 (1.00 - 1.13) |
| rs17247749 | 14  | 66292836      | GPHN                        | G/A                 | 0.1243         | 2.67*10 <sup>-04</sup> | 1.24 (1.1 - 1.39)  | 6.81*10 <sup>-02</sup> | 1.06 (1.00 - 1.13) |
| rs17765625 | 14  | 69721366      | SLC8A3, COX16               | G/A                 | 0.9476         | 1.76*10 <sup>-04</sup> | 1.43 (1.18 - 1.73) | 2.58*10 <sup>-01</sup> | 1.05 (0.96 - 1.14) |
| rs11466414 | 14  | 75517603      | C14orf179, TGFB3, C14orf159 | G/A                 | 0.9385         | 8.70*10 <sup>-04</sup> | 1.35 (1.13 - 1.6)  | 7.66*10 <sup>-03</sup> | 1.12 (1.03 - 1.23) |
| rs4903711  | 14  | 77683970      | intergenic                  | T/C                 | 0.1543         | 3.46*10 <sup>-04</sup> | 1.21 (1.09 - 1.36) | 1.83*10 <sup>-02</sup> | 1.07 (1.01 - 1.12) |
| rs10444740 | 14  | 77741579      | intergenic                  | C/G                 | 0.5518         | 5.01*10 <sup>-04</sup> | 1.16 (1.07 - 1.25) | 5.91*10 <sup>-01</sup> | 1.01 (0.97 - 1.05) |
| rs7152994  | 14  | 82706270      | intergenic                  | C/G                 | 0.7206         | 9.89*10 <sup>-04</sup> | 1.16 (1.06 - 1.27) | 2.99*10 <sup>-04</sup> | 1.12 (1.05 - 1.20) |
| rs1457011  | 14  | 82719963      | intergenic                  | G/C                 | 0.7808         | 4.79*10 <sup>-04</sup> | 1.19 (1.08 - 1.31) | 4.42*10 <sup>-04</sup> | 1.08 (1.04 - 1.13) |
| rs10484152 | 14  | 82720294      | intergenic                  | T/C                 | 0.7820         | 3.90*10 <sup>-04</sup> | 1.19 (1.08 - 1.32) | 8.14*10 <sup>-04</sup> | 1.08 (1.03 - 1.13) |
| rs7155433  | 14  | 87237928      | intergenic                  | T/C                 | 0.0097         | 1.29*10 <sup>-04</sup> | 2.15 (1.44 - 3.22) | 2.29*10 <sup>-01</sup> | 1.26 (0.87 - 1.83) |
| rs17259751 | 14  | 87256973      | intergenic                  | C/T                 | 0.0096         | 3.90*10 <sup>-04</sup> | 2.06 (1.37 - 3.08) | 1.27*10 <sup>-01</sup> | 1.33 (0.92 - 1.92) |
| rs17128893 | 14  | 92685360      | intergenic                  | A/G                 | 0.9641         | 1.47*10 <sup>-04</sup> | 1.55 (1.23 - 1.95) | 2.95*10 <sup>-03</sup> | 1.17 (1.06 - 1.30) |
| rs748752   | 14  | 94358391      | intergenic                  | A/G                 | 0.3675         | 5.21*10 <sup>-04</sup> | 1.16 (1.07 - 1.26) | 2.47*10 <sup>-01</sup> | 1.03 (0.98 - 1.07) |
| rs10130003 | 14  | 94452633      | intergenic                  | T/C                 | 0.8585         | 9.36*10 <sup>-04</sup> | 1.22 (1.08 - 1.37) | 3.03*10 <sup>-01</sup> | 1.03 (0.97 - 1.10) |

| SNP        | Chr | Position (bp) | Gene                         | Risk/NonRisk Allele | Risk frequency | GWA                    |                    | Pooled analysis        |                    |
|------------|-----|---------------|------------------------------|---------------------|----------------|------------------------|--------------------|------------------------|--------------------|
|            |     |               |                              |                     |                | P Value                | OR (95% CI)        | P Value                | OR (95% CI)        |
| rs1350277  | 14  | 97562596      | intergenic                   | T/C                 | 0.7271         | 6.24*10 <sup>-04</sup> | 1.17 (1.07 - 1.28) | 2.02*10 <sup>-01</sup> | 1.03 (0.99 - 1.07) |
| rs2183623  | 14  | 97621009      | intergenic                   | T/G                 | 0.4501         | 4.55*10 <sup>-04</sup> | 1.16 (1.07 - 1.25) | 5.33*10 <sup>-04</sup> | 1.07 (1.03 - 1.11) |
| rs11625944 | 14  | 98653124      | intergenic                   | C/A                 | 0.9166         | 7.38*10 <sup>-04</sup> | 1.29 (1.11 - 1.49) | 8.39*10 <sup>-02</sup> | 1.08 (0.99 - 1.17) |
| rs1958956  | 14  | 101200280     | intergenic                   | T/C                 | 0.4589         | 5.71*10 <sup>-05</sup> | 1.18 (1.09 - 1.28) | 7.13*10 <sup>-04</sup> | 1.10 (1.04 - 1.17) |
| rs11625483 | 14  | 101321490     | PPP2R5C                      | C/G                 | 0.6489         | 1.94*10 <sup>-04</sup> | 1.17 (1.08 - 1.28) | 9.11*10 <sup>-02</sup> | 1.03 (0.99 - 1.07) |
| rs4779824  | 15  | 29191586      | intergenic                   | T/C                 | 0.4018         | 4.98*10 <sup>-04</sup> | 1.15 (1.06 - 1.25) | 9.02*10 <sup>-02</sup> | 1.04 (0.99 - 1.08) |
| rs2338853  | 15  | 29193335      | intergenic                   | A/G                 | 0.3771         | 5.55*10 <sup>-04</sup> | 1.15 (1.06 - 1.25) | 2.59*10 <sup>-01</sup> | 1.02 (0.98 - 1.06) |
| rs4779592  | 15  | 30938399      | FMN1                         | G/A                 | 0.2051         | 3.06*10 <sup>-04</sup> | 1.2 (1.09 - 1.32)  | 4.36*10 <sup>-02</sup> | 1.05 (1.00 - 1.09) |
| rs4780050  | 15  | 30938452      | FMN1                         | C/T                 | 0.1797         | 7.27*10 <sup>-04</sup> | 1.2 (1.08 - 1.32)  | 5.87*10 <sup>-03</sup> | 1.08 (1.02 - 1.14) |
| rs4780051  | 15  | 30938654      | FMN1                         | C/G                 | 0.2053         | 4.98*10 <sup>-04</sup> | 1.19 (1.08 - 1.31) | 4.88*10 <sup>-02</sup> | 1.05 (1.00 - 1.09) |
| rs10519759 | 15  | 30939107      | FMN1                         | A/G                 | 0.2057         | 3.93*10 <sup>-04</sup> | 1.19 (1.08 - 1.32) | 4.41*10 <sup>-02</sup> | 1.05 (1.00 - 1.09) |
| rs542036   | 15  | 41328431      | TGM5, Y_RNA                  | T/C                 | 0.7503         | 8.70*10 <sup>-04</sup> | 1.17 (1.07 - 1.29) | 1.36*10 <sup>-01</sup> | 1.03 (0.99 - 1.08) |
| rs17779494 | 15  | 41366515      | TGM7                         | C/T                 | 0.7554         | 1.82*10 <sup>-04</sup> | 1.2 (1.09 - 1.32)  | 2.20*10 <sup>-03</sup> | 1.07 (1.02 - 1.12) |
| rs514438   | 15  | 41407735      | ADAL, LCMT2                  | T/C                 | 0.7895         | 2.13*10 <sup>-04</sup> | 1.21 (1.09 - 1.34) | 1.44*10 <sup>-02</sup> | 1.06 (1.01 - 1.12) |
| rs10518812 | 15  | 41440229      | ZNF690                       | A/C                 | 0.7872         | 2.49*10 <sup>-04</sup> | 1.21 (1.09 - 1.33) | 7.02*10 <sup>-02</sup> | 1.04 (1.00 - 1.09) |
| rs17780920 | 15  | 41449654      | ELL3,<br>TUBGCP4,<br>ZNF690  | C/T                 | 0.7870         | 2.50*10 <sup>-04</sup> | 1.21 (1.09 - 1.33) | 7.43*10 <sup>-02</sup> | 1.04 (1.00 - 1.09) |
| rs16957715 | 15  | 41496029      | TP53BP1,<br>TUBGCP4          | T/G                 | 0.7876         | 1.22*10 <sup>-04</sup> | 1.22 (1.1 - 1.35)  | 5.35*10 <sup>-02</sup> | 1.05 (1.00 - 1.10) |
| rs12899865 | 15  | 41528309      | TP53BP1                      | G/A                 | 0.7880         | 2.11*10 <sup>-04</sup> | 1.21 (1.09 - 1.34) | 2.35*10 <sup>-02</sup> | 1.06 (1.01 - 1.11) |
| rs17795279 | 15  | 41716670      | CATSPER2,<br>HISPPD2A,<br>U6 | C/T                 | 0.8036         | 1.81*10 <sup>-04</sup> | 1.21 (1.1 - 1.35)  | 4.37*10 <sup>-02</sup> | 1.05 (1.00 - 1.10) |
| rs11070411 | 15  | 41845926      | PDIA3                        | C/G                 | 0.8037         | 1.19*10 <sup>-04</sup> | 1.22 (1.1 - 1.36)  | 2.18*10 <sup>-02</sup> | 1.06 (1.01 - 1.11) |
| rs2930531  | 15  | 41908862      | WDR76, MFAP1                 | A/G                 | 0.8013         | 1.82*10 <sup>-04</sup> | 1.22 (1.1 - 1.35)  | 9.07*10 <sup>-02</sup> | 1.06 (0.99 - 1.14) |
| rs7183100  | 15  | 45008657      | intergenic                   | T/C                 | 0.2833         | 2.07*10 <sup>-04</sup> | 1.18 (1.08 - 1.29) | 5.76*10 <sup>-02</sup> | 1.04 (1.00 - 1.08) |
| rs12443493 | 15  | 45077010      | intergenic                   | G/A                 | 0.3051         | 7.65*10 <sup>-04</sup> | 1.16 (1.06 - 1.26) | 4.64*10 <sup>-01</sup> | 1.02 (0.97 - 1.06) |
| rs10431773 | 15  | 45080767      | intergenic                   | C/T                 | 0.3061         | 4.74*10 <sup>-04</sup> | 1.16 (1.07 - 1.27) | 4.04*10 <sup>-01</sup> | 1.02 (0.98 - 1.06) |
| rs1515744  | 15  | 45122962      | intergenic                   | A/G                 | 0.3068         | 8.41*10 <sup>-04</sup> | 1.16 (1.06 - 1.26) | 4.01*10 <sup>-01</sup> | 1.02 (0.98 - 1.06) |
| rs281299   | 15  | 45473373      | intergenic                   | C/T                 | 0.3791         | 2.44*10 <sup>-04</sup> | 1.17 (1.07 - 1.27) | 1.00*10 <sup>-02</sup> | 1.05 (1.01 - 1.09) |
| rs8036806  | 15  | 46926246      | SHC4                         | A/T                 | 0.9755         | 5.09*10 <sup>-04</sup> | 1.63 (1.23 - 2.15) | 9.33*10 <sup>-01</sup> | 1.01 (0.89 - 1.14) |
| rs16961743 | 15  | 46936551      | SHC4                         | C/T                 | 0.9754         | 5.07*10 <sup>-04</sup> | 1.63 (1.23 - 2.15) | 9.62*10 <sup>-01</sup> | 1.00 (0.88 - 1.14) |
| rs9672326  | 15  | 46944898      | SHC4                         | T/G                 | 0.9745         | 1.41*10 <sup>-04</sup> | 1.66 (1.26 - 2.18) | 6.87*10 <sup>-01</sup> | 1.03 (0.91 - 1.16) |
| rs10519195 | 15  | 46950476      | SHC4                         | C/T                 | 0.9754         | 6.99*10 <sup>-04</sup> | 1.6 (1.22 - 2.12)  | 9.08*10 <sup>-01</sup> | 1.01 (0.89 - 1.14) |

| SNP        | Chr | Position (bp) | Gene           | Risk/NonRisk Allele | Risk frequency | GWA                    |                    | Pooled analysis        |                    |
|------------|-----|---------------|----------------|---------------------|----------------|------------------------|--------------------|------------------------|--------------------|
|            |     |               |                |                     |                | P Value                | OR (95% CI)        | P Value                | OR (95% CI)        |
| rs10519196 | 15  | 46951793      | SHC4           | C/T                 | 0.9759         | 7.70*10 <sup>-05</sup> | 1.77 (1.33 - 2.36) | 7.24*10 <sup>-01</sup> | 1.02 (0.90 - 1.16) |
| rs577659   | 15  | 47248540      | GALK2          | T/C                 | 0.2049         | 8.21*10 <sup>-04</sup> | 1.18 (1.07 - 1.31) | 3.98*10 <sup>-03</sup> | 1.11 (1.03 - 1.19) |
| rs7167041  | 15  | 47542036      | FGF7, C15orf33 | G/C                 | 0.2490         | 6.29*10 <sup>-04</sup> | 1.17 (1.07 - 1.29) | 1.03*10 <sup>-03</sup> | 1.07 (1.03 - 1.12) |
| rs7180653  | 15  | 48067540      | ATP8B4         | A/G                 | 0.0349         | 1.68*10 <sup>-04</sup> | 1.5 (1.21 - 1.85)  | 2.02*10 <sup>-01</sup> | 1.07 (0.97 - 1.18) |
| rs2413998  | 15  | 48077587      | ATP8B4         | G/A                 | 0.0330         | 1.23*10 <sup>-04</sup> | 1.53 (1.23 - 1.9)  | 5.56*10 <sup>-01</sup> | 1.03 (0.93 - 1.14) |
| rs7170142  | 15  | 48111352      | ATP8B4         | A/C                 | 0.0329         | 1.47*10 <sup>-04</sup> | 1.52 (1.22 - 1.89) | 4.00*10 <sup>-01</sup> | 1.05 (0.94 - 1.16) |
| rs16963416 | 15  | 48299661      | SLC27A2, Y_RNA | G/C                 | 0.1659         | 9.68*10 <sup>-04</sup> | 1.19 (1.07 - 1.32) | 3.65*10 <sup>-01</sup> | 1.02 (0.97 - 1.07) |
| rs2165991  | 15  | 50888992      | intergenic     | G/A                 | 0.2465         | 4.99*10 <sup>-04</sup> | 1.18 (1.08 - 1.3)  | 1.65*10 <sup>-02</sup> | 1.06 (1.01 - 1.11) |
| rs2440352  | 15  | 50932511      | intergenic     | G/T                 | 0.2570         | 6.93*10 <sup>-04</sup> | 1.17 (1.07 - 1.28) | 2.37*10 <sup>-02</sup> | 1.06 (1.01 - 1.11) |
| rs4774822  | 15  | 53854963      | intergenic     | G/T                 | 0.5317         | 9.13*10 <sup>-04</sup> | 1.15 (1.06 - 1.24) | 1.78*10 <sup>-03</sup> | 1.07 (1.03 - 1.12) |
| rs2635382  | 15  | 55652104      | intergenic     | T/C                 | 0.3516         | 4.38*10 <sup>-05</sup> | 1.19 (1.09 - 1.29) | 1.26*10 <sup>-03</sup> | 1.10 (1.04 - 1.17) |
| rs1666577  | 15  | 55654219      | intergenic     | T/G                 | 0.3559         | 4.06*10 <sup>-05</sup> | 1.19 (1.09 - 1.29) | 2.46*10 <sup>-03</sup> | 1.07 (1.02 - 1.12) |
| rs7181170  | 15  | 55655740      | intergenic     | A/T                 | 0.3782         | 5.29*10 <sup>-05</sup> | 1.18 (1.09 - 1.28) | 3.84*10 <sup>-04</sup> | 1.07 (1.03 - 1.12) |
| rs1690325  | 15  | 55667015      | GRINL1A        | T/C                 | 0.4588         | 2.29*10 <sup>-04</sup> | 1.16 (1.07 - 1.26) | 2.14*10 <sup>-03</sup> | 1.09 (1.03 - 1.15) |
| rs1452455  | 15  | 85187845      | AGBL1          | A/C                 | 0.9001         | 2.03*10 <sup>-04</sup> | 1.3 (1.13 - 1.5)   | 4.33*10 <sup>-02</sup> | 1.06 (1.00 - 1.13) |
| rs3087374  | 15  | 87660998      | POLG, FANCI    | C/A                 | 0.9200         | 2.58*10 <sup>-04</sup> | 1.33 (1.14 - 1.55) | 5.23*10 <sup>-02</sup> | 1.07 (1.00 - 1.16) |
| rs11634165 | 15  | 89710119      | intergenic     | T/G                 | 0.9015         | 7.99*10 <sup>-04</sup> | 1.26 (1.1 - 1.45)  | 1.50*10 <sup>-01</sup> | 1.06 (0.98 - 1.14) |
| rs4777989  | 15  | 90807744      | ST8SIA2        | A/G                 | 0.5898         | 6.10*10 <sup>-04</sup> | 1.15 (1.06 - 1.25) | 5.66*10 <sup>-03</sup> | 1.05 (1.02 - 1.09) |
| rs2397805  | 15  | 93927621      | intergenic     | G/A                 | 0.0934         | 1.34*10 <sup>-04</sup> | 1.26 (1.1 - 1.44)  | 1.18*10 <sup>-03</sup> | 1.14 (1.05 - 1.24) |
| rs1045763  | 16  | 664085        | RHBDL1, RHOT2  | C/T                 | 0.9333         | 4.63*10 <sup>-04</sup> | 1.34 (1.14 - 1.58) | 8.09*10 <sup>-04</sup> | 1.14 (1.06 - 1.23) |
| rs2005316  | 16  | 5313941       | intergenic     | T/C                 | 0.1151         | 2.40*10 <sup>-04</sup> | 1.27 (1.12 - 1.44) | 1.53*10 <sup>-04</sup> | 1.12 (1.06 - 1.19) |
| rs932233   | 16  | 15766780      | MYH11          | G/C                 | 0.6992         | 6.30*10 <sup>-04</sup> | 1.17 (1.07 - 1.28) | 6.49*10 <sup>-04</sup> | 1.07 (1.03 - 1.12) |
| rs321472   | 16  | 26652877      | intergenic     | G/A                 | 0.3258         | 8.04*10 <sup>-04</sup> | 1.15 (1.06 - 1.26) | 7.13*10 <sup>-03</sup> | 1.06 (1.02 - 1.11) |
| rs11649335 | 16  | 66993655      | SMPD3          | T/C                 | 0.2004         | 7.62*10 <sup>-04</sup> | 1.19 (1.07 - 1.31) | 1.55*10 <sup>-01</sup> | 1.03 (0.99 - 1.08) |
| rs2278044  | 16  | 75812364      | intergenic     | G/C                 | 0.0921         | 4.99*10 <sup>-04</sup> | 1.28 (1.11 - 1.47) | 1.90*10 <sup>-01</sup> | 1.05 (0.98 - 1.12) |
| rs8064066  | 16  | 77096616      | WWOX           | C/G                 | 0.9660         | 7.96*10 <sup>-04</sup> | 1.48 (1.17 - 1.87) | 1.73*10 <sup>-02</sup> | 1.14 (1.02 - 1.27) |
| rs4888920  | 16  | 77673432      | WWOX           | A/G                 | 0.4837         | 2.00*10 <sup>-04</sup> | 1.17 (1.08 - 1.26) | 1.83*10 <sup>-03</sup> | 1.06 (1.02 - 1.10) |
| rs13339155 | 16  | 77676570      | WWOX           | A/G                 | 0.4942         | 7.94*10 <sup>-04</sup> | 1.15 (1.06 - 1.24) | 1.78*10 <sup>-03</sup> | 1.07 (1.02 - 1.11) |
| rs2875784  | 16  | 81885663      | CDH13          | G/A                 | 0.5160         | 3.65*10 <sup>-04</sup> | 1.16 (1.07 - 1.26) | 2.45*10 <sup>-02</sup> | 1.05 (1.01 - 1.10) |
| rs735675   | 16  | 82340018      | CDH13          | C/T                 | 0.9613         | 4.30*10 <sup>-05</sup> | 1.58 (1.27 - 1.97) | 1.94*10 <sup>-01</sup> | 1.07 (0.97 - 1.18) |
| rs11641114 | 16  | 82342649      | CDH13          | C/T                 | 0.9626         | 8.33*10 <sup>-05</sup> | 1.56 (1.25 - 1.96) | 2.11*10 <sup>-01</sup> | 1.06 (0.97 - 1.17) |
| rs11864540 | 16  | 82348766      | CDH13          | G/A                 | 0.9623         | 5.50*10 <sup>-05</sup> | 1.58 (1.26 - 1.97) | 3.69*10 <sup>-01</sup> | 1.05 (0.95 - 1.16) |
| rs8058334  | 16  | 82383135      | CDH13          | T/C                 | 0.8935         | 5.18*10 <sup>-05</sup> | 1.32 (1.15 - 1.51) | 1.48*10 <sup>-01</sup> | 1.05 (0.98 - 1.11) |
| rs7197423  | 16  | 82388190      | CDH13          | G/A                 | 0.9495         | 3.56*10 <sup>-05</sup> | 1.5 (1.23 - 1.82)  | 1.74*10 <sup>-01</sup> | 1.06 (0.97 - 1.16) |
| rs9940475  | 16  | 86714884      | intergenic     | T/G                 | 0.1207         | 8.28*10 <sup>-05</sup> | 1.27 (1.13 - 1.43) | 8.42*10 <sup>-01</sup> | 1.01 (0.94 - 1.08) |

| SNP        | Chr | Position (bp) | Gene            | Risk/NonRisk Allele | Risk frequency | GWA                    |                    | Pooled analysis        |                    |
|------------|-----|---------------|-----------------|---------------------|----------------|------------------------|--------------------|------------------------|--------------------|
|            |     |               |                 |                     |                | P Value                | OR (95% CI)        | P Value                | OR (95% CI)        |
| rs9936927  | 16  | 86720383      | intergenic      | A/G                 | 0.1166         | 1.78*10 <sup>-04</sup> | 1.26 (1.12 - 1.42) | 9.24*10 <sup>-01</sup> | 1.00 (0.95 - 1.06) |
| rs4534894  | 17  | 9137020       | STX8            | A/G                 | 0.6962         | 1.26*10 <sup>-04</sup> | 1.19 (1.09 - 1.3)  | 8.68*10 <sup>-02</sup> | 1.04 (0.99 - 1.08) |
| rs16946685 | 17  | 12686023      | AC005277.1      | A/G                 | 0.0301         | 4.47*10 <sup>-04</sup> | 1.51 (1.2 - 1.9)   | 3.11*10 <sup>-02</sup> | 1.14 (1.01 - 1.28) |
| rs12938215 | 17  | 32887493      | TADA2L          | G/A                 | 0.7646         | 6.24*10 <sup>-04</sup> | 1.18 (1.08 - 1.3)  | 7.49*10 <sup>-03</sup> | 1.06 (1.02 - 1.11) |
| rs11574831 | 17  | 40703393      | MAP3K14         | C/T                 | 0.8686         | 4.77*10 <sup>-04</sup> | 1.24 (1.1 - 1.4)   | 6.92*10 <sup>-02</sup> | 1.05 (1.00 - 1.11) |
| rs2873938  | 17  | 47110373      | CA10            | G/A                 | 0.4564         | 7.15*10 <sup>-04</sup> | 1.15 (1.06 - 1.25) | 9.30*10 <sup>-01</sup> | 1.00 (0.97 - 1.04) |
| rs2958933  | 17  | 50308029      | intergenic      | T/C                 | 0.9350         | 7.72*10 <sup>-04</sup> | 1.33 (1.13 - 1.58) | 7.25*10 <sup>-03</sup> | 1.13 (1.03 - 1.24) |
| rs8071484  | 17  | 50705097      | HLF             | C/T                 | 0.9369         | 4.96*10 <sup>-04</sup> | 1.35 (1.14 - 1.6)  | 7.22*10 <sup>-01</sup> | 1.02 (0.93 - 1.10) |
| rs10515149 | 17  | 53211049      | intergenic      | G/C                 | 0.0716         | 5.86*10 <sup>-04</sup> | 1.3 (1.12 - 1.52)  | 1.88*10 <sup>-01</sup> | 1.05 (0.98 - 1.13) |
| rs8077600  | 17  | 55968112      | intergenic      | C/T                 | 0.0391         | 4.03*10 <sup>-04</sup> | 1.44 (1.17 - 1.76) | 5.06*10 <sup>-02</sup> | 1.11 (1.00 - 1.22) |
| rs1197062  | 17  | 55995900      | intergenic      | G/T                 | 0.0406         | 6.38*10 <sup>-04</sup> | 1.4 (1.15 - 1.71)  | 3.54*10 <sup>-02</sup> | 1.12 (1.01 - 1.26) |
| rs757558   | 17  | 60992054      | AXIN2           | T/G                 | 0.1637         | 2.59*10 <sup>-05</sup> | 1.25 (1.13 - 1.4)  | 4.56*10 <sup>-01</sup> | 1.02 (0.96 - 1.09) |
| rs734232   | 17  | 70277326      | SLC9A3R1, NAT9  | G/A                 | 0.5759         | 3.58*10 <sup>-04</sup> | 1.14 (1.05 - 1.23) | 4.26*10 <sup>-01</sup> | 1.02 (0.97 - 1.06) |
| rs9908508  | 17  | 73201616      | intergenic      | C/T                 | 0.9594         | 2.09*10 <sup>-04</sup> | 1.49 (1.2 - 1.85)  | 3.92*10 <sup>-02</sup> | 1.10 (1.00 - 1.21) |
| rs9901599  | 17  | 73207843      | intergenic      | A/C                 | 0.6754         | 2.77*10 <sup>-04</sup> | 1.17 (1.08 - 1.28) | 7.59*10 <sup>-02</sup> | 1.04 (1.00 - 1.08) |
| rs9902073  | 17  | 73208038      | intergenic      | A/C                 | 0.9582         | 2.49*10 <sup>-04</sup> | 1.48 (1.2 - 1.83)  | 6.00*10 <sup>-02</sup> | 1.09 (1.00 - 1.20) |
| rs9897643  | 17  | 73213171      | intergenic      | G/C                 | 0.9059         | 1.65*10 <sup>-04</sup> | 1.31 (1.14 - 1.51) | 4.12*10 <sup>-03</sup> | 1.10 (1.03 - 1.18) |
| rs7217176  | 17  | 73788078      | AC087645.19-201 | G/A                 | 0.0531         | 2.18*10 <sup>-05</sup> | 1.45 (1.22 - 1.72) | 4.55*10 <sup>-02</sup> | 1.10 (1.00 - 1.21) |
| rs9891371  | 17  | 78531117      | B3GNTL1         | A/G                 | 0.0144         | 6.74*10 <sup>-04</sup> | 1.75 (1.26 - 2.43) | 9.31*10 <sup>-02</sup> | 1.19 (0.97 - 1.45) |
| rs12606657 | 18  | 10448256      | APCDD1          | A/C                 | 0.1789         | 9.83*10 <sup>-04</sup> | 1.19 (1.07 - 1.32) | 1.97*10 <sup>-01</sup> | 1.05 (0.98 - 1.13) |
| rs11663520 | 18  | 13420212      | C18orf1         | A/C                 | 0.5137         | 6.24*10 <sup>-04</sup> | 1.15 (1.06 - 1.24) | 1.56*10 <sup>-01</sup> | 1.03 (0.99 - 1.08) |
| rs12458775 | 18  | 13422341      | C18orf1         | T/C                 | 0.4516         | 2.53*10 <sup>-04</sup> | 1.16 (1.07 - 1.26) | 5.30*10 <sup>-02</sup> | 1.04 (1.00 - 1.09) |
| rs9950714  | 18  | 21545098      | intergenic      | T/C                 | 0.0898         | 4.82*10 <sup>-04</sup> | 1.28 (1.11 - 1.47) | 2.79*10 <sup>-01</sup> | 1.04 (0.97 - 1.10) |
| rs16941764 | 18  | 21560658      | intergenic      | A/G                 | 0.0918         | 6.49*10 <sup>-04</sup> | 1.27 (1.11 - 1.46) | 2.64*10 <sup>-01</sup> | 1.04 (0.97 - 1.10) |
| rs10502876 | 18  | 42511420      | ST8SIA5         | A/G                 | 0.0298         | 7.01*10 <sup>-04</sup> | 1.48 (1.18 - 1.85) | 2.38*10 <sup>-01</sup> | 1.06 (0.96 - 1.17) |
| rs16955291 | 18  | 48383321      | DCC             | G/A                 | 0.9771         | 5.19*10 <sup>-04</sup> | 1.66 (1.24 - 2.22) | 3.55*10 <sup>-02</sup> | 1.16 (1.01 - 1.34) |
| rs559998   | 18  | 52468021      | WDR7            | G/T                 | 0.8505         | 7.93*10 <sup>-04</sup> | 1.19 (1.06 - 1.33) | 2.51*10 <sup>-02</sup> | 1.06 (1.01 - 1.12) |
| rs477415   | 18  | 52470097      | WDR7            | A/T                 | 0.8516         | 6.26*10 <sup>-04</sup> | 1.2 (1.07 - 1.34)  | 1.47*10 <sup>-02</sup> | 1.07 (1.01 - 1.12) |
| rs12953387 | 18  | 52516963      | WDR7            | T/C                 | 0.8495         | 1.91*10 <sup>-04</sup> | 1.21 (1.08 - 1.35) | 1.47*10 <sup>-02</sup> | 1.07 (1.01 - 1.12) |
| rs2080681  | 18  | 52539900      | WDR7            | G/T                 | 0.8493         | 2.43*10 <sup>-04</sup> | 1.2 (1.07 - 1.35)  | 1.67*10 <sup>-02</sup> | 1.07 (1.01 - 1.12) |
| rs4800956  | 18  | 52854527      | intergenic      | C/T                 | 0.6512         | 7.00*10 <sup>-04</sup> | 1.16 (1.06 - 1.26) | 2.51*10 <sup>-01</sup> | 1.02 (0.98 - 1.06) |
| rs1426284  | 18  | 56889918      | intergenic      | A/G                 | 0.9651         | 5.17*10 <sup>-05</sup> | 1.62 (1.28 - 2.04) | 3.34*10 <sup>-02</sup> | 1.12 (1.01 - 1.24) |
| rs8090450  | 18  | 56903198      | intergenic      | G/A                 | 0.9832         | 4.96*10 <sup>-05</sup> | 2.06 (1.44 - 2.94) | 1.25*10 <sup>-01</sup> | 1.13 (0.97 - 1.31) |
| rs17067791 | 18  | 56936463      | intergenic      | G/A                 | 0.9812         | 1.02*10 <sup>-04</sup> | 1.89 (1.36 - 2.62) | 1.82*10 <sup>-02</sup> | 1.30 (1.05 - 1.63) |
| rs10460149 | 18  | 56938911      | intergenic      | C/T                 | 0.9803         | 3.60*10 <sup>-04</sup> | 1.76 (1.29 - 2.42) | 1.31*10 <sup>-01</sup> | 1.12 (0.97 - 1.30) |

| SNP        | Chr | Position (bp) | Gene                  | Risk/NonRisk Allele | Risk frequency | GWA                    |                    | Pooled analysis        |                    |
|------------|-----|---------------|-----------------------|---------------------|----------------|------------------------|--------------------|------------------------|--------------------|
|            |     |               |                       |                     |                | P Value                | OR (95% CI)        | P Value                | OR (95% CI)        |
| rs1421521  | 18  | 60236486      | intergenic            | G/A                 | 0.6498         | 4.29*10 <sup>-04</sup> | 1.17 (1.07 - 1.27) | 9.03*10 <sup>-05</sup> | 1.08 (1.04 - 1.13) |
| rs11151300 | 18  | 62549968      | intergenic            | G/A                 | 0.2601         | 2.73*10 <sup>-04</sup> | 1.17 (1.07 - 1.28) | 6.30*10 <sup>-01</sup> | 1.01 (0.97 - 1.05) |
| rs17754718 | 18  | 69411839      | intergenic            | T/C                 | 0.4396         | 6.61*10 <sup>-04</sup> | 1.15 (1.06 - 1.25) | 3.49*10 <sup>-02</sup> | 1.05 (1.00 - 1.10) |
| rs1943858  | 18  | 69444668      | intergenic            | T/C                 | 0.3180         | 4.02*10 <sup>-04</sup> | 1.17 (1.07 - 1.27) | 2.78*10 <sup>-02</sup> | 1.07 (1.01 - 1.14) |
| rs17829352 | 18  | 69444962      | intergenic            | A/G                 | 0.3162         | 6.13*10 <sup>-04</sup> | 1.16 (1.07 - 1.27) | 2.05*10 <sup>-01</sup> | 1.03 (0.99 - 1.07) |
| rs1943856  | 18  | 69445059      | intergenic            | T/C                 | 0.3171         | 9.23*10 <sup>-04</sup> | 1.16 (1.06 - 1.26) | 2.70*10 <sup>-01</sup> | 1.02 (0.98 - 1.07) |
| rs17762504 | 18  | 69459603      | intergenic            | A/T                 | 0.3235         | 9.30*10 <sup>-04</sup> | 1.16 (1.06 - 1.26) | 3.62*10 <sup>-01</sup> | 1.02 (0.98 - 1.06) |
| rs4892122  | 18  | 69473702      | intergenic            | G/A                 | 0.3332         | 9.10*10 <sup>-04</sup> | 1.15 (1.06 - 1.26) | 4.51*10 <sup>-01</sup> | 1.02 (0.97 - 1.06) |
| rs9953978  | 18  | 69498407      | intergenic            | G/A                 | 0.3470         | 5.76*10 <sup>-04</sup> | 1.16 (1.06 - 1.26) | 5.64*10 <sup>-02</sup> | 1.04 (1.00 - 1.08) |
| rs1667918  | 18  | 72945946      | MBP                   | G/A                 | 0.2053         | 1.97*10 <sup>-04</sup> | 1.19 (1.08 - 1.31) | 8.41*10 <sup>-01</sup> | 1.00 (0.96 - 1.05) |
| rs12957544 | 18  | 73371516      | intergenic            | A/G                 | 0.6302         | 5.52*10 <sup>-04</sup> | 1.15 (1.06 - 1.25) | 1.19*10 <sup>-01</sup> | 1.03 (0.99 - 1.08) |
| rs2168838  | 18  | 74319036      | intergenic            | A/T                 | 0.1335         | 9.20*10 <sup>-04</sup> | 1.21 (1.08 - 1.36) | 1.08*10 <sup>-01</sup> | 1.04 (0.99 - 1.10) |
| rs10415811 | 19  | 11038408      | SMARCA4               | T/C                 | 0.7081         | 7.20*10 <sup>-04</sup> | 1.17 (1.07 - 1.28) | 2.30*10 <sup>-04</sup> | 1.13 (1.06 - 1.20) |
| rs1062958  | 19  | 11477807      | ECSIT, ZNF653         | A/G                 | 0.9708         | 2.41*10 <sup>-04</sup> | 1.61 (1.24 - 2.07) | 4.06*10 <sup>-03</sup> | 1.35 (1.10 - 1.66) |
| rs2361019  | 19  | 22521453      | ZNF729                | A/T                 | 0.4326         | 3.27*10 <sup>-04</sup> | 1.16 (1.07 - 1.26) | 3.50*10 <sup>-03</sup> | 1.06 (1.02 - 1.10) |
| rs1105167  | 19  | 33320637      | intergenic            | T/C                 | 0.8546         | 2.00*10 <sup>-05</sup> | 1.29 (1.15 - 1.45) | 1.77*10 <sup>-01</sup> | 1.04 (0.98 - 1.09) |
| rs4805590  | 19  | 35810431      | intergenic            | T/C                 | 0.4909         | 9.59*10 <sup>-04</sup> | 1.14 (1.06 - 1.24) | 4.96*10 <sup>-01</sup> | 1.01 (0.97 - 1.06) |
| rs10417396 | 19  | 35817069      | intergenic            | T/A                 | 0.4924         | 9.64*10 <sup>-04</sup> | 1.14 (1.06 - 1.24) | 2.67*10 <sup>-01</sup> | 1.02 (0.98 - 1.07) |
| rs2867078  | 19  | 35827051      | intergenic            | A/G                 | 0.4950         | 3.07*10 <sup>-04</sup> | 1.16 (1.07 - 1.25) | 7.11*10 <sup>-01</sup> | 1.01 (0.97 - 1.05) |
| rs17714261 | 19  | 49669102      | ZNF180,<br>AC069278.1 | C/T                 | 0.2124         | 7.74*10 <sup>-04</sup> | 1.18 (1.07 - 1.3)  | 7.93*10 <sup>-04</sup> | 1.08 (1.03 - 1.13) |
| rs1399834  | 19  | 56489138      | intergenic            | A/G                 | 0.4446         | 7.42*10 <sup>-04</sup> | 1.15 (1.06 - 1.24) | 4.87*10 <sup>-03</sup> | 1.07 (1.02 - 1.11) |
| rs299170   | 19  | 61008282      | NLRP11                | A/G                 | 0.7091         | 4.29*10 <sup>-05</sup> | 1.18 (1.08 - 1.29) | 9.84*10 <sup>-01</sup> | 1.00 (0.96 - 1.04) |
| rs6052360  | 20  | 4039972       | intergenic            | C/T                 | 0.1064         | 2.61*10 <sup>-04</sup> | 1.26 (1.11 - 1.43) | 4.91*10 <sup>-01</sup> | 1.02 (0.96 - 1.09) |
| rs13039424 | 20  | 38055505      | intergenic            | C/T                 | 0.2129         | 2.44*10 <sup>-05</sup> | 1.21 (1.1 - 1.33)  | 5.40*10 <sup>-02</sup> | 1.05 (1.00 - 1.09) |
| rs10485664 | 20  | 38064192      | intergenic            | G/A                 | 0.2105         | 2.62*10 <sup>-05</sup> | 1.21 (1.1 - 1.34)  | 9.70*10 <sup>-03</sup> | 1.06 (1.01 - 1.11) |
| rs4812422  | 20  | 38085300      | intergenic            | G/C                 | 0.2077         | 1.36*10 <sup>-04</sup> | 1.2 (1.09 - 1.32)  | 1.14*10 <sup>-01</sup> | 1.04 (0.99 - 1.10) |
| rs8122094  | 20  | 39115097      | TOP1                  | G/C                 | 0.2269         | 2.24*10 <sup>-05</sup> | 1.23 (1.12 - 1.35) | 6.23*10 <sup>-03</sup> | 1.06 (1.02 - 1.11) |
| rs2179680  | 20  | 42229264      | JPH2                  | G/A                 | 0.4631         | 3.44*10 <sup>-05</sup> | 1.18 (1.09 - 1.28) | 1.95*10 <sup>-02</sup> | 1.07 (1.01 - 1.13) |
| rs4812790  | 20  | 42236111      | JPH2                  | C/T                 | 0.6175         | 5.58*10 <sup>-04</sup> | 1.15 (1.06 - 1.25) | 6.90*10 <sup>-01</sup> | 1.01 (0.97 - 1.05) |
| rs4812791  | 20  | 42236175      | JPH2                  | C/T                 | 0.6154         | 2.58*10 <sup>-04</sup> | 1.17 (1.07 - 1.27) | 9.08*10 <sup>-01</sup> | 1.00 (0.96 - 1.04) |
| rs738498   | 20  | 42241323      | JPH2                  | G/A                 | 0.6174         | 7.84*10 <sup>-04</sup> | 1.15 (1.06 - 1.25) | 9.80*10 <sup>-01</sup> | 1.00 (0.96 - 1.04) |
| rs667008   | 20  | 47837871      | intergenic            | A/G                 | 0.0175         | 4.57*10 <sup>-04</sup> | 1.7 (1.26 - 2.29)  | 1.88*10 <sup>-01</sup> | 1.15 (0.93 - 1.43) |
| rs12479616 | 20  | 54854061      | intergenic            | T/C                 | 0.6430         | 1.03*10 <sup>-04</sup> | 1.18 (1.08 - 1.28) | 3.40*10 <sup>-02</sup> | 1.05 (1.00 - 1.10) |
| rs12481021 | 20  | 54855185      | intergenic            | A/G                 | 0.5941         | 6.72*10 <sup>-05</sup> | 1.17 (1.08 - 1.27) | 1.41*10 <sup>-01</sup> | 1.04 (0.99 - 1.09) |

| SNP        | Chr | Position (bp) | Gene                 | Risk/NonRisk Allele | Risk frequency | GWA                    |                    | Pooled analysis        |                    |
|------------|-----|---------------|----------------------|---------------------|----------------|------------------------|--------------------|------------------------|--------------------|
|            |     |               |                      |                     |                | P Value                | OR (95% CI)        | P Value                | OR (95% CI)        |
| rs1537479  | 20  | 56260074      | PPP4R1L, AL354776.15 | T/C                 | 0.5556         | 9.95*10 <sup>-04</sup> | 1.15 (1.06 - 1.24) | 3.61*10 <sup>-02</sup> | 1.04 (1.00 - 1.08) |
| rs531317   | 20  | 56324877      | RAB22A               | A/G                 | 0.8246         | 7.92*10 <sup>-04</sup> | 1.2 (1.08 - 1.34)  | 3.59*10 <sup>-03</sup> | 1.09 (1.03 - 1.15) |
| rs718670   | 21  | 14570025      | ABCC13               | T/C                 | 0.1548         | 2.34*10 <sup>-04</sup> | 1.23 (1.1 - 1.37)  | 3.60*10 <sup>-01</sup> | 1.02 (0.97 - 1.08) |
| rs718671   | 21  | 14570050      | ABCC13               | G/A                 | 0.1575         | 3.91*10 <sup>-04</sup> | 1.22 (1.09 - 1.36) | 6.55*10 <sup>-01</sup> | 1.01 (0.96 - 1.06) |
| rs17274722 | 21  | 15220401      | intergenic           | T/C                 | 0.0918         | 8.85*10 <sup>-04</sup> | 1.26 (1.1 - 1.45)  | 6.02*10 <sup>-02</sup> | 1.07 (1.00 - 1.15) |
| rs9981313  | 21  | 29752264      | intergenic           | T/G                 | 0.5790         | 9.52*10 <sup>-04</sup> | 1.14 (1.06 - 1.24) | 7.95*10 <sup>-03</sup> | 1.06 (1.01 - 1.10) |
| rs2835327  | 21  | 36543972      | DOPEY2               | G/A                 | 0.8493         | 7.25*10 <sup>-04</sup> | 1.22 (1.09 - 1.37) | 8.42*10 <sup>-04</sup> | 1.10 (1.04 - 1.17) |
| rs8130834  | 21  | 42143203      | PRDM15               | T/C                 | 0.2294         | 1.69*10 <sup>-04</sup> | 1.19 (1.08 - 1.31) | 2.73*10 <sup>-03</sup> | 1.07 (1.02 - 1.12) |
| rs4346474  | 21  | 42146473      | PRDM15               | A/T                 | 0.2293         | 2.93*10 <sup>-04</sup> | 1.18 (1.08 - 1.3)  | 6.83*10 <sup>-03</sup> | 1.06 (1.02 - 1.11) |
| rs385674   | 21  | 45367098      | ADARB1               | G/A                 | 0.3349         | 1.64*10 <sup>-04</sup> | 1.18 (1.08 - 1.28) | 2.80*10 <sup>-03</sup> | 1.06 (1.02 - 1.10) |
| rs412626   | 21  | 45370468      | ADARB1               | A/G                 | 0.1806         | 1.25*10 <sup>-04</sup> | 1.22 (1.1 - 1.36)  | 2.10*10 <sup>-01</sup> | 1.03 (0.98 - 1.09) |
| rs391815   | 21  | 45373039      | ADARB1               | G/A                 | 0.3356         | 1.35*10 <sup>-04</sup> | 1.18 (1.08 - 1.28) | 4.89*10 <sup>-03</sup> | 1.06 (1.02 - 1.11) |
| rs5761704  | 22  | 25449061      | intergenic           | C/T                 | 0.5012         | 4.82*10 <sup>-04</sup> | 1.15 (1.06 - 1.24) | 1.61*10 <sup>-01</sup> | 1.03 (0.99 - 1.06) |
| rs6005150  | 22  | 25452480      | intergenic           | C/T                 | 0.3701         | 1.03*10 <sup>-04</sup> | 1.16 (1.07 - 1.26) | 3.85*10 <sup>-01</sup> | 1.02 (0.98 - 1.06) |
| rs5761709  | 22  | 25453638      | intergenic           | G/T                 | 0.3708         | 1.42*10 <sup>-04</sup> | 1.16 (1.06 - 1.26) | 3.21*10 <sup>-01</sup> | 1.02 (0.98 - 1.06) |
| rs5761710  | 22  | 25453944      | intergenic           | T/C                 | 0.3748         | 7.63*10 <sup>-05</sup> | 1.16 (1.07 - 1.26) | 2.92*10 <sup>-01</sup> | 1.02 (0.98 - 1.06) |
| rs5761711  | 22  | 25459747      | intergenic           | A/G                 | 0.5079         | 8.43*10 <sup>-06</sup> | 1.18 (1.09 - 1.28) | 2.73*10 <sup>-01</sup> | 1.02 (0.98 - 1.06) |
| rs7291420  | 22  | 34018623      | HMG2L1               | T/C                 | 0.0372         | 3.06*10 <sup>-04</sup> | 1.43 (1.16 - 1.76) | 8.18*10 <sup>-02</sup> | 1.09 (0.99 - 1.21) |
| rs133416   | 22  | 34136376      | MCM5                 | T/C                 | 0.2879         | 8.74*10 <sup>-04</sup> | 1.16 (1.06 - 1.27) | 2.82*10 <sup>-01</sup> | 1.03 (0.98 - 1.08) |
| rs9610322  | 22  | 34310119      | intergenic           | A/G                 | 0.5367         | 3.85*10 <sup>-04</sup> | 1.16 (1.07 - 1.25) | 9.77*10 <sup>-02</sup> | 1.03 (0.99 - 1.07) |
| rs989677   | 22  | 43147495      | intergenic           | G/C                 | 0.2184         | 8.78*10 <sup>-04</sup> | 1.18 (1.07 - 1.3)  | 9.43*10 <sup>-01</sup> | 1.00 (0.95 - 1.06) |
| rs4823354  | 22  | 43148331      | intergenic           | C/T                 | 0.2172         | 6.13*10 <sup>-04</sup> | 1.18 (1.08 - 1.3)  | 8.02*10 <sup>-01</sup> | 1.01 (0.96 - 1.06) |
| rs5766424  | 22  | 43881197      | intergenic           | A/G                 | 0.4644         | 6.12*10 <sup>-04</sup> | 1.15 (1.06 - 1.24) | 7.84*10 <sup>-01</sup> | 1.01 (0.96 - 1.06) |
| rs2858642  | 22  | 48037941      | intergenic           | A/C                 | 0.1501         | 3.71*10 <sup>-04</sup> | 1.22 (1.1 - 1.37)  | 1.25*10 <sup>-01</sup> | 1.05 (0.99 - 1.12) |
| rs802637   | 23  | 154639046     | intergenic           | C/A                 | 0.9575         | 9.49*10 <sup>-04</sup> | 1.42 (1.15 - 1.74) | 9.09*10 <sup>-01</sup> | 1.02 (0.77 - 1.34) |
| rs781716   | 23  | 154648189     | SPRY3                | T/C                 | 0.2948         | 3.41*10 <sup>-07</sup> | 1.26 (1.15 - 1.38) | 7.39*10 <sup>-01</sup> | 1.02 (0.90 - 1.16) |

**Supplementary Table 5. SNPs previously reported to be associated with CAD and/or myocardial infarction in the literature used for eQTL analyses**

|            | Chr      | Gene                 | Reference |
|------------|----------|----------------------|-----------|
| rs10755578 | 6q26-q27 | LPA                  | 15        |
| rs11206510 | 1p32.3   | PCSK9                | 6         |
| rs1122608  | 19p13.2  | SMARCA4, LDLR        | 6         |
| rs12526453 | 6p24.1   | PHACTR1              | 6         |
| rs1333048  | 9p21.3   | ANRIL                | 16        |
| rs17228212 | 15q22.33 | SMAD3                | 3         |
| rs1746048  | 10q11.21 | intergenic, CXCL12   | 6         |
| rs17465637 | 1q41     | MIA3                 | 6         |
| rs17672135 | 1q43     | FMN2                 | 7         |
| rs2048327  | 6q26-q27 | SLC22A3              | 15        |
| rs2146807  | 10q11.21 | intergenic, CXCL12   | 17        |
| rs2259816  | 12q24.31 | HNF1A, C12orf43      | 4         |
| rs2439554  | 6p24.1   | intergenic           | 18        |
| rs2943634  | 2q36.3   | intergenic           | 3         |
| rs3127599  | 6q26-q27 | LPAL2                | 15        |
| rs4977574  | 9p21.3   | ANRIL                | 6         |
| rs599839   | 1p13.1   | PSRC1, SORT1         | 3         |
| rs629301*  | 1p13.1   | CELSR2, PSRC1, SORT1 | 6         |
| rs671765   | 10q11.21 | intergenic, CXCL12   | 3         |
| rs6725887  | 2q33.1   | WDR12                | 6         |
| rs688034   | 22q12    | SEZ61                | 7         |
| rs6922269  | 6q25.1   | MTHFD1L              | 3         |
| rs7767084  | 6q26-q27 | LPA                  | 15        |
| rs8055236  | 16q23    | CDH13                | 7         |
| rs9818870  | 3q22.3   | MRAS                 | 4         |
| rs9978407  | 21q22.11 | SLC5A3, MRPS6, KCNE2 | 6         |

\*The corresponding published tagSNP for rs629301 is rs646776

**Part C – Supplementary Figures**

**Supplementary Figure 1. Meta-analysis of the association of the loci on chromosome 9p21.3 with coronary artery disease in a case-control design including 14 independent cohorts of European ancestry with n=59,789**

Forest plots showing SNPs on chromosome 9p21.3 that reached genome-wide significance in the final meta-analysis ( $P < 5 \times 10^{-8}$ ). The individual odds ratios (OR) with 95% confidence intervals and p-values are presented.

**1 A.**

rs1333049  
 OR 1.27  
 95% CI 1.23 - 1.31  
 $P = 7.12 \times 10^{-58}$

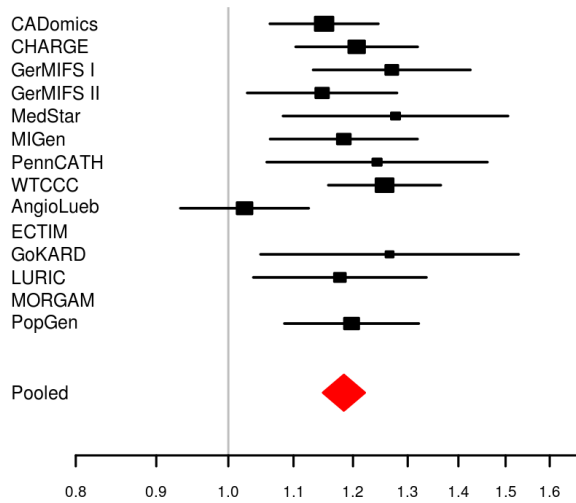

**1 B.**

rs7044859  
 OR 1.18  
 95% CI 1.15 - 1.22  
 $P = 3.93 \times 10^{-27}$

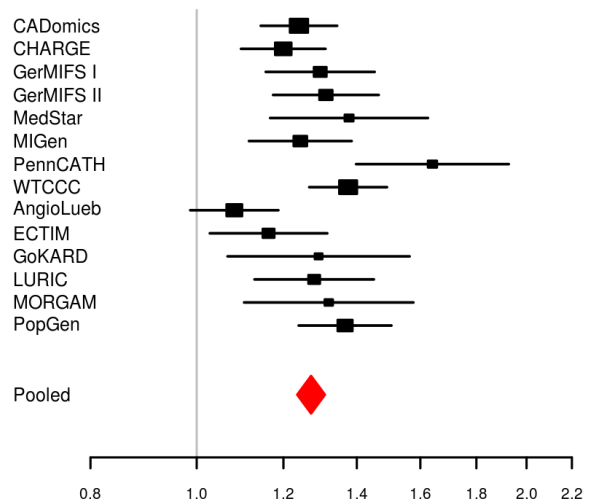



**1 C.**

rs7865618  
 OR 1.18  
 95% CI 1.14 – 1.21  
 P =  $1.72 \times 10^{-27}$

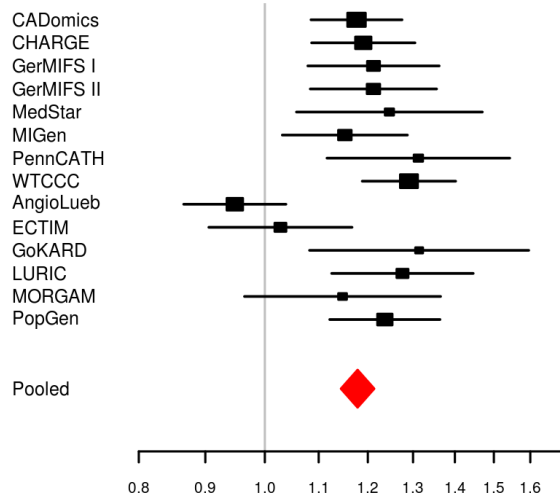

**Supplementary Figure 2. Platform validation of *LIPA* eSNP - eQTL transcript analyses**

For validation of association of *LIPA* eSNPs rs1412444 and rs2246833 with *LIPA* transcript, semi-quantitative RT-PCR was performed on 119 monocytic total RNA samples of the GHSExpress Study that were not used for global gene expression analysis, but for whom genotypes were available. Boxplots are shown for the fold change of *LIPA* expression depending on the genotype. Fold change of *LIPA* expression was calculated relative to median expression of the non-risk allele (C) genotype.

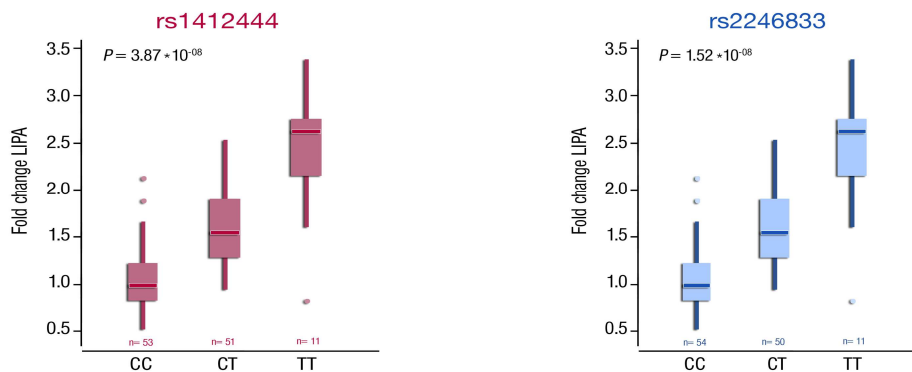

## Part D. Supplementary References

1. Blankenberg S, Rupprecht HJ, Bickel C, Torzewski M, Hafner G, Tiret L, Smieja M, Cambien F, Meyer J, Lackner KJ. Glutathione peroxidase 1 activity and cardiovascular events in patients with coronary artery disease. *N Engl J Med.* 2003;349:1605-1613
2. Psaty BM, O'Donnell CJ, Gudnason V, Lunetta KL, Folsom AR, Rotter JI, Uitterlinden AG, Harris TB, Witteman JC, Boerwinkle E. Cohorts for heart and aging research in genomic epidemiology (charge) consortium: Design of prospective meta-analyses of genome-wide association studies from 5 cohorts. *Circ Cardiovasc Genet.* 2009;2:73-80
3. Samani NJ, Erdmann J, Hall AS, Hengstenberg C, Mangino M, Mayer B, Dixon RJ, Meitinger T, Braund P, Wichmann HE, Barrett JH, König IR, Stevens SE, Szymczak S, Tregouet DA, Iles MM, Pahlke F, Pollard H, Lieb W, Cambien F, Fischer M, Ouwehand W, Blankenberg S, Balmforth AJ, Baessler A, Ball SG, Strom TM, Braenne I, Gieger C, Deloukas P, Tobin MD, Ziegler A, Thompson JR, Schunkert H. Genomewide association analysis of coronary artery disease. *N Engl J Med.* 2007;357:443-453
4. Erdmann J, Grosshennig A, Braund PS, König IR, Hengstenberg C, Hall AS, Linsel-Nitschke P, Kathiresan S, Wright B, Tregouet DA, Cambien F, Bruse P, Aherrahrou Z, Wagner AK, Stark K, Schwartz SM, Salomaa V, Elosua R, Melander O, Voight BF, O'Donnell CJ, Peltonen L, Siscovick DS, Altshuler D, Merlino PA, Peyvandi F, Bernardinelli L, Ardissino D, Schillert A, Blankenberg S, Zeller T, Wild P, Schwarz DF, Tiret L, Perret C, Schreiber S, El Mokhtari NE, Schafer A, Marz W, Renner W, Bugert P, Kluter H, Schrezenmeir J, Rubin D, Ball SG, Balmforth AJ, Wichmann HE, Meitinger T, Fischer M, Meisinger C, Baumert J, Peters A, Ouwehand WH, Deloukas P, Thompson JR, Ziegler A, Samani NJ, Schunkert H. New susceptibility locus for coronary artery disease on chromosome 3q22.3. *Nat Genet.* 2009;41:280-282

5. Grant SF, Thorleifsson G, Reynisdottir I, Benediktsson R, Manolescu A, Sainz J, Helgason A, Stefansson H, Emilsson V, Helgadóttir A, Styrkarsdóttir U, Magnusson KP, Walters GB, Palsdóttir E, Jonsdóttir T, Gudmundsdóttir T, Gylfason A, Saemundsdóttir J, Wilensky RL, Reilly MP, Rader DJ, Bagger Y, Christiansen C, Gudnason V, Sigurdsson G, Thorsteinsdóttir U, Gulcher JR, Kong A, Stefansson K. Variant of transcription factor 7-like 2 (*tcf7l2*) gene confers risk of type 2 diabetes. *Nat Genet.* 2006;38:320-323
6. Kathiresan S, Voight BF, Purcell S, Musunuru K, Ardissino D, Mannucci PM, Anand S, Engert JC, Samani NJ, Schunkert H, Erdmann J, Reilly MP, Rader DJ, Morgan T, Spertus JA, Stoll M, Girelli D, McKeown PP, Patterson CC, Siscovick DS, O'Donnell CJ, Elosua R, Peltonen L, Salomaa V, Schwartz SM, Melander O, Altshuler D, Merlini PA, Berzuini C, Bernardinelli L, Peyvandi F, Tubaro M, Celli P, Ferrario M, Fève R, Marziliano N, Casari G, Galli M, Ribichini F, Rossi M, Bernardi F, Zonzin P, Piazza A, Yee J, Friedlander Y, Marrugat J, Lucas G, Subirana I, Sala J, Ramos R, Meigs JB, Williams G, Nathan DM, MacRae CA, Havulinna AS, Berglund G, Hirschhorn JN, Asselta R, Duga S, Sreafico M, Daly MJ, Nemes J, Korn JM, McCarroll SA, Surti A, Guiducci C, Gianniny L, Mirel D, Parkin M, Burt N, Gabriel SB, Thompson JR, Braund PS, Wright BJ, Balmforth AJ, Ball SG, Hall AS, Linsel-Nitschke P, Lieb W, Ziegler A, König I, Hengstenberg C, Fischer M, Stark K, Grosshennig A, Preuss M, Wichmann HE, Schreiber S, Ouwehand W, Deloukas P, Scholz M, Cambien F, Li M, Chen Z, Wilensky R, Matthai W, Qasim A, Hakonarson HH, Devaney J, Burnett MS, Pichard AD, Kent KM, Satler L, Lindsay JM, Waksman R, Epstein SE, Scheffold T, Berger K, Häge A, Martinelli N, Olivieri O, Corrocher R, McKeown P, Erdmann E, König IR, Holm H, Thorleifsson G, Thorsteinsdóttir U, Stefansson K, Do R, Xie C, Siscovick D. Genome-wide association of early-onset myocardial infarction with single nucleotide polymorphisms and copy number variants. *Nat Genet.* 2009;41:334-341
7. Genome-wide association study of 14,000 cases of seven common diseases and 3,000 shared controls. *Nature.* 2007;447:661-678

8. Kee F, Morrison C, Evans AE, McCrum E, McMaster D, Dallongeville J, Nicaud V, Poirier O, Cambien F. Polymorphisms of the p-selectin gene and risk of myocardial infarction in men and women in the ectim extension study. Etude cas-temoin de l'infarctus myocarde. *Heart*. 2000;84:548-552
9. Parra HJ, Arveiler D, Evans AE, Cambou JP, Amouyel P, Bingham A, McMaster D, Schaffer P, Douste-Blazy P, Luc G, et al. A case-control study of lipoprotein particles in two populations at contrasting risk for coronary heart disease. The ectim study. *Arterioscler Thromb*. 1992;12:701-707
10. Winkelmann BR, Marz W, Boehm BO, Zotz R, Hager J, Hellstern P, Senges J. Rationale and design of the luric study--a resource for functional genomics, pharmacogenomics and long-term prognosis of cardiovascular disease. *Pharmacogenomics*. 2001;2:S1-73
11. Evans A, Salomaa V, Kulathinal S, Asplund K, Cambien F, Ferrario M, Perola M, Peltonen L, Shields D, Tunstall-Pedoe H, Kuulasmaa K. Morgam (an international pooling of cardiovascular cohorts). *Int J Epidemiol*. 2005;34:21-27
12. Krawczak M, Nikolaus S, von Eberstein H, Croucher PJ, El Mokhtari NE, Schreiber S. Popgen: Population-based recruitment of patients and controls for the analysis of complex genotype-phenotype relationships. *Community Genet*. 2006;9:55-61
13. Warnholtz A, Wild P, Ostad MA, Elsner V, Stieber F, Schinzel R, Walter U, Peetz D, Lackner K, Blankenberg S, Munzel T. Effects of oral niacin on endothelial dysfunction in patients with coronary artery disease: Results of the randomized, double-blind, placebo-controlled inef study. *Atherosclerosis*. 2009;204:216-221
14. Zeller T, Wild P, Szymczak S, Rotival M, Schillert A, Castagne R, Maouche S, Germain M, Lackner K, Rossmann H, Eleftheriadis M, Sinning CR, Schnabel RB, Lubos E, Mennerich D, Rust W, Perret C, Proust C, Nicaud V, Loscalzo J, Hubner N, Tregouet D, Munzel T, Ziegler A, Tiret L, Blankenberg S, Cambien F. Genetics and beyond--the transcriptome of human monocytes and disease susceptibility. *PLoS One*. 5:e10693

15. Tregouet DA, König IR, Erdmann J, Munteanu A, Braund PS, Hall AS, Grosshennig A, Linsel-Nitschke P, Perret C, DeSuremain M, Meitinger T, Wright BJ, Preuss M, Balmforth AJ, Ball SG, Meisinger C, Germain C, Evans A, Arveiler D, Luc G, Ruidavets JB, Morrison C, van der Harst P, Schreiber S, Neureuther K, Schafer A, Bugert P, El Mokhtari NE, Schrezenmeir J, Stark K, Rubin D, Wichmann HE, Hengstenberg C, Ouwehand W, Ziegler A, Tiret L, Thompson JR, Cambien F, Schunkert H, Samani NJ. Genome-wide haplotype association study identifies the *slc22a3-lpa2-lpa* gene cluster as a risk locus for coronary artery disease. *Nat Genet.* 2009;41:283-285
16. McPherson R, Pertsemlidis A, Kavaslar N, Stewart A, Roberts R, Cox DR, Hinds DA, Pennacchio LA, Tybjaerg-Hansen A, Folsom AR, Boerwinkle E, Hobbs HH, Cohen JC. A common allele on chromosome 9 associated with coronary heart disease. *Science.* 2007;316:1488-1491
17. Karvanen J, Silander K, Kee F, Tiret L, Salomaa V, Kuulasmaa K, Wiklund PG, Virtamo J, Saarela O, Perret C, Perola M, Peltonen L, Cambien F, Erdmann J, Samani NJ, Schunkert H, Evans A. The impact of newly identified loci on coronary heart disease, stroke and total mortality in the morgam prospective cohorts. *Genet Epidemiol.* 2009;33:237-246
18. Larson MG, Atwood LD, Benjamin EJ, Cupples LA, D'Agostino RB, Sr., Fox CS, Govindaraju DR, Guo CY, Heard-Costa NL, Hwang SJ, Murabito JM, Newton-Cheh C, O'Donnell CJ, Seshadri S, Vasan RS, Wang TJ, Wolf PA, Levy D. Framingham heart study 100k project: Genome-wide associations for cardiovascular disease outcomes. *BMC Med Genet.* 2007;8 Suppl 1:S5

## Part E. Affiliations of Authors to Cohorts

**CADomics (Coronary Artery Disease and Genomics) Study:** Department of Medicine II, University Medical Center Mainz, Germany (Wild PS, Zeller T, Sinning CR, Deiseroth A, Schnabel RB, Lubos E, Keller T, Eleftheriadis MS, Rupprecht HJ, Wilde S, Munzel T, Blankenberg S); Institute of Medical Biometry and Statistics, University at Lübeck, University Hospital Schleswig-Holstein, Lübeck, Germany (Schillert A, Szymczak S, Ziegler A); Department of Internal Medicine, Federal Armed Hospital Koblenz, Germany (Bickel C), Institute for Clinical Chemistry and Laboratory Medicine, Johannes Gutenberg-University Mainz, Germany (Rossmann H, Lackner KJ); INSERM UMRS937, Pierre and Marie Curie University and Medical School, Paris, France (Cambien F, Tiret L, Perret C, Proust C, Yon E)

### Cohorts for *in silico* replication

**Cohorts of Heart and Aging Research in Genomic Epidemiology (CHARGE) Consortium:** National Heart, Lung and Blood Institute's Framingham Heart Study, Framingham, MA, USA (Cupples LA, Demissie S, O'Donnell CJ); Icelandic Heart Association, Kopavogur Iceland (Smith AV, Gudnason V); University of Iceland, Reykjavik, Iceland (Smith AV); Laboratory of Epidemiology, Demography, and Biometry, Intramural Research Program, National Institute on Aging, National Institutes of Health, Bethesda MD, USA (Harris TB); Department of Medicine, University of Washington, Seattle, Washington, USA (Bis JC); Department of Epidemiology, Erasmus Medical Center, Rotterdam, The Netherlands (Kavousi M, Witteman JCM, Uitterlinden AG, Hofman A); Netherlands Genomics Initiative (NGI)-Sponsored Netherlands Consortium for Healthy Aging (NCHA) (Kavousi M, Witteman JCM, Uitterlinden AG, Hofman A); Department of Internal Medicine, Erasmus Medical Center, Rotterdam, The Netherlands (Uitterlinden AG); University of Minnesota School of Public Health, Division of Epidemiology and Community Health, School of Public Health, Minneapolis, Minn, USA (Folsom AR); University of Texas Health Science Center, Human Genetics Center, Houston, TX, USA (Barbalic M, Boerwinkle E)

**German MI Family Study I (GerMIFS I):** Medizinische Klinik II, Universität zu Lübeck, Ratzeburger Allee 160, 23538 Lübeck, Germany (Schunkert H); Institut für Epidemiologie, Helmholtz Zentrum München, Ingolstädter Landstraße 1, 85764 Neuherberg, Germany (Wichmann HE); Institute of Clinical Molecular Biology, Christian-Albrechts-University Kiel, Arnold-Heller Strasse 3, 24105 Kiel (Schreiber S)

**German MI Family Study II (GerMIFS II):** Medizinische Klinik II, Universität zu Lübeck, Ratzeburger Allee 160, 23538 Lübeck, Germany (Erdmann J); Institute of Medical Biometry and Statistics, University at Lübeck, University Hospital Schleswig-Holstein, Lübeck, Germany (König IR, Ziegler A); Institut für Epidemiologie, Helmholtz Zentrum München, Ingolstädter Landstraße 1, 85764 Neuherberg, Germany (Peters A); Klinik und Poliklinik für Innere Medizin II University Hospital Regensburg Franz-Josef-Strauss-Allee 11 93053 Regensburg (Hengstenberg C)

**MedStar Study:** Cardiovascular Research Institute MedStar Health Research Institute Washington, D.C. 20010 (Epstein SE, Burnett MS, Devaney J); Cardiovascular Institute University of Pennsylvania 650 BRB, 421 Curie Blvd, Philadelphia 19104, USA (Reilly MP); Center for Applied Genomics Children's Hospital of Philadelphia / University of Pennsylvania, 14 Abrahamson Research, Philadelphia 19104, USA (Hakonarson H); Institute of Translational Medicine and Therapeutics University of Pennsylvania, 650 BRB, 421 Curie Blvd, Philadelphia 19104, USA (Rader DJ)

**Myocardial Infarction Genetics (MIGen) Consortium:** Broad Institute, 5 Cambridge Center, Cambridge 02142, USA (Voight BF); Cardiovascular Health Research Unit, Departments of Medicine and Epidemiology University of Washington 1730 Minor Ave., Mail Room 9, Seattle 98101 USA (Siscovick D, Schwartz S); Department of Clinical Sciences Lund University Lund SE, 205 02, Sweden (Melander O); National Heart, Lung, and Blood Institute's Framingham Heart Study Framingham 01702 USA (O'Donnell CJ); THL-National Institute for Health and Welfare POB 30, Mannerheimintie 166 Helsinki FI-00271, Finland (Salomaa V); Grup d'Epidemiologia i Genètica Cardiovascular IMIM Doctor Aiguader, 88 Barcelona 08003, Spain (Elosua R); Center for Human Genetic Research and Department of Molecular Biology, Massachusetts General Hospital, 185 Cambridge Street, Boston 02114, USA (Altshuler D); Center for Human Genetic Research and Cardiovascular Research Center, Massachusetts General Hospital, 185 Cambridge Street, Boston 02114, USA (Kathiresan S)

**PennCATH Study:** Department of Biostatistics University of Pennsylvania, 2 Blockley, Philadelphia 19104, USA (Li M, Qu L); Cardiovascular Institute University of Pennsylvania, Philadelphia 19104, USA (Reilly MP, Mehta NN); Center for Applied Genomics Children's Hospital of Philadelphia / University of Pennsylvania, 14 Abrahamson Research, Philadelphia 19104, USA (Hakonarson H), Institute of Translational Medicine and Therapeutics University of Pennsylvania 650 BRB, 421 Curie Blvd, Philadelphia 19104, USA (Rader, DJ)

**Wellcome Trust Case-Control Consortium CAD (WTCCC-CAD) Study:** Department of Health Sciences University of Leicester University Road Leicester LE1 7RH UK (Thompson JR); Leeds Institute of Genetics, Health and Therapeutics University of Leeds Great George Street Leeds Leeds LS1 3EX UK (Hall AS); Department of Cardiovascular Sciences University of Leicester Glenfield Hospital, Groby Road Leicester LE3 9QP, UK (Braund PS, Samani NJ)

#### **Cohorts for wet lab replication**

##### **AngioLueb Study:**

Medizinische Klinik II, Universität zu Lübeck, Ratzeburger Allee 160, 23538 Lübeck, Germany (Linsel-Nitschke P, Sager H); Institut für Epidemiologie, Helmholtz Zentrum München, Ingolstädter Landstraße 1, 85764 Neuherberg, Germany (Baumert J)

**Etude Cas-Témoin sur l'Infarctus du Myocarde (ECTIM) Study:** INSERM UMRS937, Pierre and Marie Curie University and Medical School, Paris, France (Cambien F)

**GoKard (Genetische Epidemiologie in der Kardiologie) Study** Klinik und Poliklinik für Innere Medizin II University Hospital Regensburg Franz-Josef-Strauss-Allee 11 93053 Regensburg (Stark K; Reinhard W, Hengstenberg C)

**Ludwigshafen Risk and Cardiovascular Health (LURIC) Study:** LURIC Study nonprofit LLC, Platz der Alten Synagoge 1, 79098 Freiburg (Kleber ME); Hoffmann Michael M, University Medical Center, Hugstetter Strasse 49, 79075 Freiburg (Hoffmann MM); März Winfried, Synlab Center of Laboratory Diagnostics Heidelberg, PO Box 10 47 80, 69037 Heidelberg (März W)

**popgen Study:** Institute of Clinical Molecular Biology, Christian-Albrechts-University Kiel, Arnold-Heller Strasse 3, 24105 Kiel (Schäfer AS, Schreiber S); Clinic of Cardiology, University Medical Center Schleswig-Holstein, Arnold-Heller Strasse 3, 24105 Kiel (Mokthari NEE); Internal Medicine University Medical Center Schleswig-Holstein, Arnold-Heller Strasse 3, 24105 Kiel (Rubin D); Institute of Physiology and Biochemistry of Nutrition, Max Rubner-Institute, Hermann-Weigmann-Str 1, 24103 Kiel (Schrezenmier J)

**Monica Risk, Genetics, Archiving and Monograph (MORGAM) Study:** THL-National Institute for Health and Welfare Dept. of Chronic Disease Prevention, P.O.Box 30, Mannerheimintie 166 Helsinki FI-00271, Finland (Salomaa V, Kuulasmaa, Sarella O, Silander K, Virtamo J); Department of Medicine II, University Medical Center Mainz, Germany (Blankenberg S); UK Clinical Research Collaboration Center of Excellence for Public Health, Queens University of Belfast, BT12 6BJ, Northern Ireland (Kee F, Evans A); Department of Public Health and Clinical Medicine, University Hospital Umeå University, SE-901 85 Umeå, Sweden (Wiklund PG); INSERM U508, Dept. Epidemiology and Public Health, Pasteur Institute of Lille, 1 rue Albert Calmette, B.P.245 59019 Lille Cedex, France (Amouyel P); Laboratoire d'Epidémiologie et de Santé Publique, 11 rue Humann Bâtiment 4, 67085 Strasbourg Cedex, France (Arveiler D); Faculté de Médecine Toulouse Purpan, Département d'Epidémiologie - Bât G, 37 Allées Jules Guesde, 31073 Toulouse Cedex, France (Ferrières J); INSERM UMRS937, Pierre and Marie Curie University and Medical School, Paris, France (Cambien F, Tiret L); Institut für Epidemiologie, Helmholtz Zentrum München, Ingolstädter Landstraße 1, 85764 Neuherberg, Germany (Illig T, Klopp N, Peters A),



**Part E. Source of Funding and Acknowledgment for replication studies (in alphabetical order)**

**AngioLueb**

We acknowledge Petra Burse for technical assistance. This study was funded by the European Union sponsored project Cardiogenics (LSHM-CT 2006-037593), by the National Genome Network (01GS0418 to Drs. Schunkert, Erdmann) sponsored by the German Federal Ministry of Education and Research (BMBF).

**CHARGE**

CHARGE cohorts include National Heart, Lung, and Blood Institute's ARIC Study, NIA's Iceland Age, Gene/Environment Susceptibility Study, National Heart, Lung, and Blood Institute's Cardiovascular Health Study and Framingham Heart Study, and the Netherland's Rotterdam Study. The study funding for the CHARGE Cohorts involved in this study are provided below (see also Psaty BM, O'Donnell CJ, et al. *Circ Cardiovasc Genetics* 2009;2:73-80).

The Age, Gene/Environment Susceptibility Reykjavik Study has been funded by NIH contract N01-AG-12100, the NIA Intramural Research Program, Hjartavernd (the Icelandic Heart Association), and the Althingi (the Icelandic Parliament).

The Atherosclerosis Risk in Communities Study is carried out as a collaborative study supported by National Heart, Lung, and Blood Institute [contracts N01-HC-55015, N01-HC-55016, N01-HC-55018, N01-HC-55019, N01-HC-55020, N01-HC-55021, N01-HC-55022, R01HL087641, R01HL59367, R01HL086694 and U10HL054512]; National Human Genome Research Institute [contract U01HG004402]; and National Institutes of Health [contract HHSN268200625226C]. Infrastructure was partly supported by a component of the National Institutes of Health and National Institutes of Health Roadmap for Medical Research [grant UL1RR025005].

The Framingham Heart Study work was supported by the National Heart Lung and Blood Institute of the National Institutes of Health and Boston University School of Medicine (Contract No. N01-HC-25195), its contract with Affymetrix, Inc for genotyping services (Contract No. N02-HL-6-4278), based upon analyses by Framingham Heart Study investigators participating in the SNP Health Association Resource (SHARe) project. A portion of this research was conducted using the Linux Cluster for Genetic Analysis (LinGA-II) funded by the Robert Dawson Evans Endowment of the Department of Medicine at Boston University School of Medicine and Boston Medical Center.

The Rotterdam GWA study was funded by the Netherlands Organisation of Scientific Research NWO Investments (nr. 175.010.2005.011, 911-03-012), the Research Institute for Diseases in the Elderly (014-93-015; RIDE2), the Netherlands Genomics Initiative (NGI)/Netherlands Consortium for Healthy Aging (NCHA) project nr. 050-060-810. We thank Pascal Arp, Mila Jhamai, Dr Michael Moorhouse, Marijn Verkerk, and Sander Bervoets for their help in creating the GWAS database. The Rotterdam Study is funded by Erasmus Medical Center and Erasmus University, Rotterdam, Netherlands Organization for the Health Research and Development (ZonMw), the Research Institute for Diseases in the Elderly (RIDE), the Netherlands Heart Foundation, the Ministry of Education, Culture and Science, the Ministry for Health, Welfare and Sports, the European Commission (DG XII), and the Municipality of Rotterdam. The authors are very grateful to the participants and staff from the Rotterdam Study, the participating general practitioners and the pharmacists. We would like to thank Dr. Tobias A. Knoch, Luc V. de Zeeuw, Anis Abuseiris, and Rob de Graaf as well as their institutions the Erasmus Computing Grid, Rotterdam, The Netherlands, and especially the national German MediGRID and Services@MediGRID part of the German D-Grid, both funded by the German Bundesministerium fuer Forschung und Technology under grants #01 AK 803 A-H and # 01 IG 07015 G, for access to their grid resources.

### **ECTIM**

We acknowledge the primary investigators of the Etude Cas-Témoins sur l'infarctus du Myocarde

Study (ECTIM): D. Arveiler, F. Cambien, A. Evans, F. Kee, G. Luc, C. Morrison, J.-B. Ruidavets.

### **GerMIFS I und II**

The German Myocardial Infarction Studies were supported by the Deutsche Forschungsgemeinschaft, the German Federal Ministry of Education and Research (BMBF) in the context of the German National Genome Research Network (NGFN-2 and NGFN-plus), and the EU funded integrated project Cardiogenics (LSHM-CT-2006-037593).

### **GoKard**

We appreciate the invaluable contribution of participants of the GoKARD study. We gratefully acknowledge the excellent support of Ute Hubauer, PhD, and the technical assistance of Michaela Schmid and Josef Simon.

Part of this work was financed by the German National Genome Research Network (NGFN-2 01GS0417 and NGFNplus Atherogenomics 01GS0832), the German Heart Foundation (Deutsche Herzstiftung), German Research Foundation (Deutsche Forschungsgemeinschaft DFG He1921/9-1), and by the University Hospital of Regensburg, Germany.

### **LURIC**

The authors extend appreciation to the participants of the LURIC and the LURIC study team either temporarily or permanently involved in patient recruitment, sample and data handling, and the laboratory staff at the Ludwigshafen General Hospital and the Universities of Freiburg and Ulm, Germany. LURIC has received funding through the 6th Framework Program (integrated project Bloodomics, grant LSHM-CT-2004-503485) and 7th of Framework Program (integrated project Atheroremo, Grant Agreement number 201668) of the European Union.

### **MIGen**

The US National Institutes of Health (NIH) and the National Heart, Lung, and Blood Institute the Myocardial Infarction Genetics Consortium study through the STAMPEED genomics research program (R01 HL087676). Genotyping was partially funded by The Broad Institute Center for Genotyping and Analysis, which is supported by grant U54 RR020278 from the National Center for Research Resources.

### **MORGAM**

The research was supported by the MORGAM Project grant under the Biomed 2 Programme, by the GenomEUtwin Project grant under the Programme 'Quality of Life and Management of the Living Resources' of 5th Framework Programme (no QLG2-CT-2002-01254) and through the European Community's Seventh Framework Programme (FP7/2007-2013), ENGAGE project, grant agreement HEALTH-F4-2007- 201413.

Sites and key personnel of contributing MORGAM Centres:

#### Finland

*FINRISK*: National Institute for Health and Welfare, Helsinki: V. Salomaa (principal investigator), A. Juolevi, E. Vartiainen, P. Jousilahti;

*ATBC*: National Institute for Health and Welfare, Helsinki: J. Virtamo (principal investigator), H. Kilpeläinen;

*MORGAM Data Centre*: National Institute for Health and Welfare, Helsinki: K. Kuulasmaa (head), Z. Cepaitis, A. Haukijärvi, B. Joseph, J. Karvanen, S. Kulathinal, M. Niemelä, O. Saarela;

*MORGAM Central Laboratory*: National Institute for Health and Welfare, Helsinki:

M. Perola (responsible person), L. Peltonen, K. Silander, M. Alanne, P. Laiho, K. Kristiansson, K. Ahonen;

#### France

*National Coordinating Centre*: National Institute of Health and Medical Research (U258), Paris: P. Ducimetière (national coordinator), A. Bingham

*PRIME/Strasbourg*: Department of Epidemiology and Public Health, Louis Pasteur University, Faculty of Medicine, Strasbourg: D. Arveiler (principal investigator), B. Haas, A. Wagner;

*PRIME/Toulouse*: Department of Epidemiology, Toulouse University School of Medicine, Toulouse: J. Ferrières (Principal Investigator), J-B. Ruidavets, V. Bongard, D. Deckers, C. Saulet, S. Barrere

*PRIME/Lille*: Department of Epidemiology and Public Health, Pasteur Institute of Lille: P. Amouyel (principal investigator), M. Montaye, B. Lemaire, S. Beauchant, D. Cotel, C. Graux, N. Marecaux, C. Steclebout, S. Szeremeta

*MORGAM Laboratory*: INSERM U525, Paris: F. Cambien (responsible person), L. Tiret, V. Nicaud;

Germany

*MORGAM Laboratory*: Helmholtz Zentrum München, Neuherberg: T. Illig (responsible person), N Klopp;

Sweden

*Northern Sweden*: Umeå University Hospital, Department of Medicine, Umeå: P-G Wiklund (principal investigator), B. Stegmayr (former principal investigator), K. Asplund (former principal investigator), S. Nasic, G. Rönnerberg, Å. Johansson, V. Lundberg, E. Jägare-Westerberg, T. Messner

United Kingdom

*MORGAM Coordinating Centre*: Queen's University Belfast, Belfast, Northern Ireland: A. Evans (MORGAM coordinator), S. Cashman, F Kee;

*MORGAM Management Group*: A. Evans (chair), S. Blankenberg (Mainz, Germany), F. Cambien,

M. Ferrario (Varese, Italy), K. Kuulasmaa, A. Palotie (Hinxton, U.K.), M. Perola, A. Peters, V. Salomaa, P-G. Wiklund, H. Tunstall-Pedoe (Dundee, Scotland); former members: K. Asplund, L. Peltonen, D. Shields (Dublin, Ireland), B. Stegmayr.

***PennCATH/MedStar***

Recruitment of the PennCATH cohort was supported by the Cardiovascular Institute of the University of Pennsylvania. Recruitment of the MedStar cohort was supported by research grants from GlaxoSmithKline, the Washington Hospital Center, and the MedStar Health Research Institute. Genotyping was performed at the Center for Applied Genomics at the Children's Hospital of Philadelphia and supported by GlaxoSmithKline through an Alternate Drug Discovery Initiative research alliance award (to M.P.R. and D.J.R.) with the University of Pennsylvania School of Medicine.

***popGen***

The popgen study was funded by the BMBF through the POPGEN biobank project (01GR0468). The Max Rubner-Institute controls were recruited and phenotyped by a BMBF grant "Dietary fat and metabolism - gene variability, function and regulation (AZ 0313437).

***WTCCC-CAD***

The WTCCC Study was funded by the Wellcome Trust. Recruitment of cases for the WTCCC-CAD Study was carried out by the British Heart Foundation (BHF) Family Heart Study Research Group and supported by the BHF and the UK Medical Research Council. We are grateful to Dr Jonathan Marchini for carrying out imputation in the WTCCC-CAD data. NJS holds a chair funded by the BHF and is a UK National Institute for Health Research Senior Investigator. The work on WTCCC-CAD is part of the portfolio of research supported by the Leicester NIHR Biomedical Research Unit in Cardiovascular Disease. We thank the WTCCC for allowing us access to their data.
